# Supplementary material for: Photo-induced decarboxylative coupling reaction between aliphatic N-hydroxyphthalimide esters and terminal 2-trifluoromethylalkenes
Source: Royal Society of Chemistry journal article supplement (doi:10.1039/d4ob01950d), 2025-01-01

**Supporting Information for**  
**Photo-induced Decarboxylative Coupling Reaction between Aliphatic**  
***N*-hydroxyphthalimide Esters and Terminal 2-**  
**Trifluoromethylalkenes**

Man Chen,<sup>1</sup> Chaoyu Wang,<sup>2</sup> Lang Xie,<sup>1</sup> Ting Mao,<sup>1</sup> Long Xiao,<sup>1</sup> Ze Wang,<sup>1</sup> Wen-Yong Han,<sup>1,2</sup>  
Ping Liu,<sup>\*2</sup> and Jia Jia<sup>\*1,3</sup>

1. Key Laboratory of Biocatalysis & Chiral Drug Synthesis of Guizhou Province, Generic Drug Research Center of Guizhou Province, Zunyi Medical University, Zunyi, Guizhou, 563000, China.
2. Key Laboratory of Clinical Pharmacy of Guizhou Province, School of Pharmacy, Zunyi Medical University, Zunyi, Guizhou, China
3. Key Laboratory of Basic Pharmacology of Ministry of Education and Joint International Research Laboratory of Ethnomedicine of Ministry of Education. School of Pharmacy, Zunyi Medical University, Zunyi, Guizhou, P. R. China.

## Table of Contents

|                                                                                                                                                                  |    |
|------------------------------------------------------------------------------------------------------------------------------------------------------------------|----|
| 1. General information .....                                                                                                                                     | 1  |
| 2. General procedure for the synthesis of trifluoromethyl alkenes .....                                                                                          | 1  |
| 3. General procedure for the decarboxylative coupling reaction between aliphatic <i>N</i> -hydroxyphthalimide esters and terminal 2-trifluoromethylalkenes ..... | 3  |
| 4. Detailed procedure for the gram scale synthesis .....                                                                                                         | 4  |
| 5. Mechanism studies .....                                                                                                                                       | 4  |
| 6. Materials and methods of tumor cell growth inhibition test .....                                                                                              | 7  |
| 7. Characterization data for the products .....                                                                                                                  | 8  |
| 8. Reference .....                                                                                                                                               | 21 |
| 9. Copies of <sup>1</sup> H NMR, <sup>19</sup> F NMR and <sup>13</sup> C NMR charts of the Products .....                                                        | 22 |

## 1. General information

$^1\text{H}$  NMR and  $^{13}\text{C}$  NMR spectra were recorded on an Agilent MR400 spectrometer.  $^{19}\text{F}$  NMR was recorded on an Agilent MR400 spectrometer. Chemical shifts ( $\delta$ ) are reported in ppm and coupling constants ( $J$ ) are in Hertz (Hz). The following abbreviations were used to explain the multiplicities: s = singlet, d = doublet, t = triplet, q = quartet, m = multiplet, br = broad. High-resolution mass spectra were recorded on a Thermo Scientific Q Exactive HF with Fourier-transform (orbitrap) mass spectrometer and Agilent Technologies 7250 GCQTOF in laboratory of mass spectrometry analysis at Shanghai Institute of Organic Chemistry and Guizhou Natural Products Research Center. Melting points were taken on a SGW X-4 Melting Point Apparatus.

**Materials:** All reagents were either used directly as received from commercial sources or prepared according to the descriptions in the literature. They were all weighed and handled in air at room temperature.

## 2. General procedure for the synthesis of trifluoromethyl alkenes

### Method A<sup>[1]</sup>:

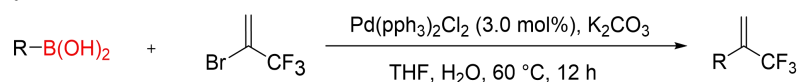

To a 25 mL Schlenk tube was added aryl boric acid (3.0 mmol, 1.0 equiv.), potassium carbonate (12.0 mmol, 4.0 equiv.), bis(triphenylphosphine)palladium(II) chloride (0.09 mmol, 3 mol%). Then removed air under vacuum and charged with Ar (3 times). The tube was added THF (9.0 mL), 2-bromo-3,3,3- trifluoropropene (4.5 mmol, 1.5 equiv.), degassed deionized H<sub>2</sub>O (6.0 mL) subsequently and sealed tightly. The reaction was heated to 60 °C for 12 hours. The mixture was cooled to room temperature, extracted with ethyl acetate and remove solvent under vacuum. The residue was purified through column chromatography utilizing silica gel, with a mixture of ethyl acetate and petroleum ether serving as the eluent. The trifluoromethyl alkenes employed in the synthesis of **3a-3c**, **3e**, **3f**, **3h**, **3i**, **3k** were prepared in accordance with method A.

### Method B<sup>[2]</sup>:

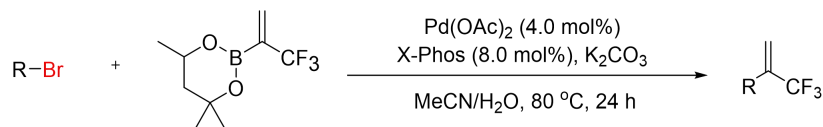

To a 25 mL Schlenk tube was added aryl bromide (1.0 mmol, 1.0 equiv.), X-Phos (0.08 mmol, 8 mol%), potassium carbonate (414.6mg, 3.0 mmol, 3.0 equiv.), Palladium (II) Acetate (0.04 mmol, 4 mol%). The reaction mixture was evacuated and backfilled with Ar (3 times). The tube was added 4,4,6-trimethyl-2-(3,3,3-trifluoroprop-1-en-2-yl)-1,3,2-dioxaborinane (1.5 equiv.), MeCN (3.0 mL), degassed deionized  $H_2O$  (1.5 mL) subsequently and sealed tightly. The tube was screw-capped, and the reaction mixture was stirred for 48 h at 80 °C. The mixture was cooled to room temperature, extracted with ethyl acetate and remove solvent under vacuum. The residue was purified through column chromatography utilizing silica gel, with a mixture of ethyl acetate and petroleum ether serving as the eluent. The trifluoromethyl alkenes employed in the synthesis of **3d**, **3g**, **3j**, **3h**, **3l-3n** were prepared in accordance with method B.

### Method C<sup>[3]</sup>:

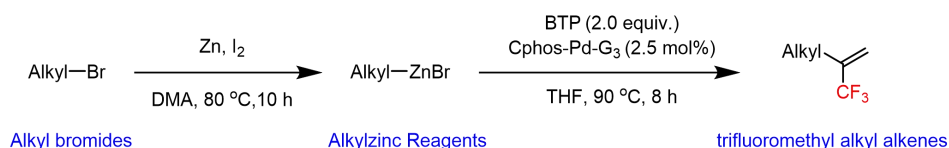

**step 1:** A 25 mL of Schlenk tube was charged with zinc powder (295.0 mg, 4.5 mmol) and heated to 80 °C under vacuum for 30 min. After the tube was back-filled with argon and cooled to room temperature, iodine (38.0 mg, 0.15 mmol) and DMA (3.0 mL) were added. The resulting mixture was stirred until the brown color disappeared, then alkylbromide (3.0 mmol) was added. The reaction mixture was heated to 80 °C. After stirring for 10 h at 80 °C, the mixture was cooled to room temperature. The gray solution was filtered and the filtrate was stored under argon in a Schlenk tube, the solution of the alkylzinc reagent was titrated with  $I_2$  according to Knochel's method.

General Procedure for the Palladium Catalyzed Cross-Coupling of Alkylzinc Reagents With 2-Bromo-3, 3, 3-trifluoropropane (**step 2**): To a 25 mL of Schlenk tube was added Cphos-Pd-G<sub>3</sub> (4.0 mg, 2.5 mol%). The tube was evacuated and backfilled with argon for three times, then alkylzinc reagent (0.3 mmol, 1.0 equiv), 2-bromo-3, 3, 3-trifluoropropane (0.6 mmol, 2.0 equiv) and THF (2.0 mL) were added. The Schlenk tube was screw capped and put into a preheated oil bath (90 °C). After stirring for 8 h, the reaction mixture was cooled to room temperature. The reaction mixture was diluted with EtOAc (50.0 mL) and filtered with a pad of cellite. The filtrate was washed with water (15.0 mL). The organic layer was dried over Na<sub>2</sub>SO<sub>4</sub>, filtered and concentrated. The residue was purified with silica gel chromatography to give the pure product. The trifluoromethyl alkenes employed in the synthesis of **3o-3r** were prepared in accordance with method B.

### 3. General procedure for the decarboxylative coupling reaction between aliphatic *N*-hydroxyphthalimide esters and terminal 2-trifluoromethylalkenes

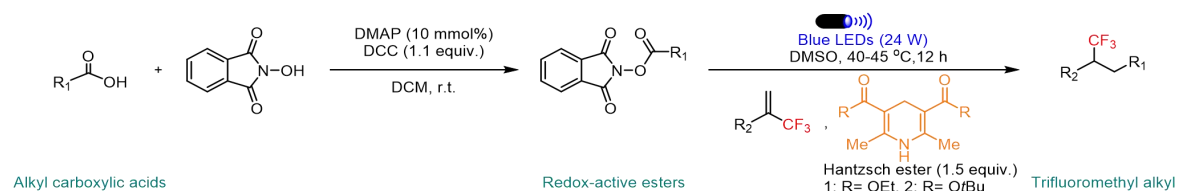

Redox-active esters were prepared according to our previous reported procedures (**step 1**)<sup>[4]</sup>. (**step 2**): A 25 mL oven-dried Schlenk tube equipped with a magnetic stirrer bar was charged with the redox active esters (0.4 mmol, 2.0 equiv), Hantzsch ester (0.3 mmol, 1.5 equiv). The tube was evacuated and backfilled with argon for three times, followed by the addition of dry DMSO (2.0 mL) and trifluoromethyl alkenes (0.2 mmol, 1.0 equiv). The tube was screw capped and heated to 40 °C under irradiation of 24 W blue LEDs. After stirred for 12 h, the reaction mixture was diluted with EtOAc (150.0 mL) washed with water and brine, dried over anhydrous Na<sub>2</sub>SO<sub>4</sub>,

filtered and concentrated under vacuum. The product was purified through silica gel chromatography, resulting in the corresponding pure product.

#### 4. Detailed procedure for the gram scale synthesis

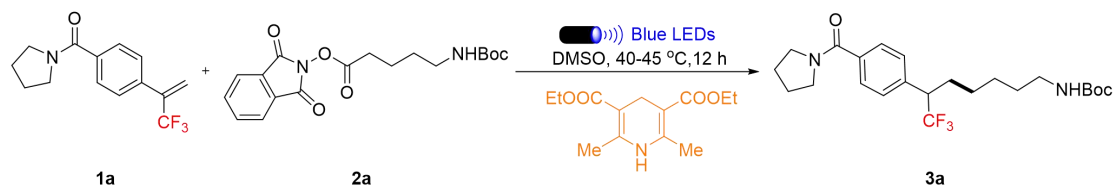

A 100.0 mL oven-dried Schlenk tube equipped with a magnetic stirrer bar was charged with **2a** (7.5 mmol, 1.5 equiv), Hantzsch ester (7.5 mmol, 1.5 equiv). The tube was evacuated and backfilled with argon for three times, followed by the addition of dry DMSO (50.0 mL) and **1a** (5.0 mmol, 1.0 equiv). The tube was screw capped and heated to 40-45 °C (heat was produced by LEDs) under irradiation of blue LEDs. After stirring for 12 h, the reaction mixture was diluted with ethyl acetate. The organic layer was washed with brine, dried over anhydrous Na<sub>2</sub>SO<sub>4</sub>, and concentrated under reduced pressure. The product **3a** (2.1272 g, 96% yield) was purified with silica gel chromatography to give corresponding pure product.

#### 5. Mechanism studies

##### 5.1 Addition of radical and SET inhibitors

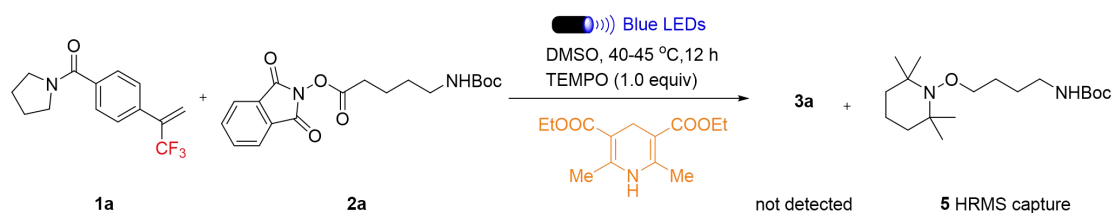

A 25.0 mL oven-dried Schlenk tube equipped with a magnetic stirrer bar was charged with the **2a** (0.3 mmol, 1.5 equiv), Hantzsch ester (0.3 mmol, 1.5 equiv), TEMPO (0.2 mmol, 1.0 equiv). The tube was evacuated and backfilled with argon for three times, followed by the addition of dry DMSO (0.5 mL) and **1a** (0.1 mmol, 1.0 equiv). The tube was screw capped and heated to 40-45 °C (heat was produced by LED) under irradiation of blue LEDs. After stirring for 12 h, the reaction mixture was cooled to room temperature, the reaction solution was diluted with 2.0 mL ethyl acetate,

pretreatment and monitored by TLC and sent to HRMS. The results indicated that the reaction was totally suppressed by the addition of a radical scavenger TEMPO, which suggests that the involvement of radical intermediates is likely during the reaction.

## 5.2 High resolution ESI-MS and MS/MS experiments for detecting TEMPO complex

High resolution ESI-MS and MS/MS spectra were recorded on a Q Exactive HF Orbitrap mass spectrometer (Thermo Fisher Scientific Inc.) equipped with ESI ion source. The ESI conditions were: spray voltage 3500 V; capillary temperature, 275 °C; sheath gas flow rate 35 arb. units. Data acquisition and analysis were done with the Thermo Xcalibur (version 4.2.47) software package.

The elemental composition analysis of the ion at  $m/z$  328.2729 by HRMS (Figure S1) supported the proposed structure of TEMPO complex.

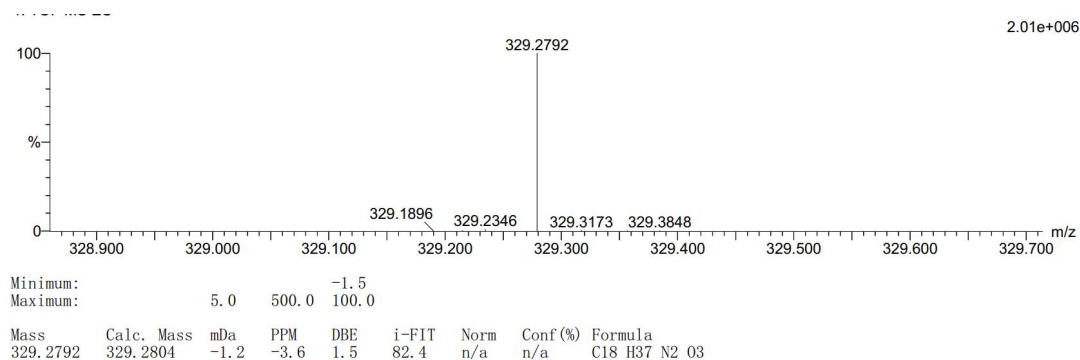

Figure S1. High resolution ESI-MS spectrum of TEMPO complex calculated for  $C_{18}H_{37}N_2O_3$  ( $[M+H]^+$ ): 329.2804; Found: 329.2792.

## 5.3 UV-vis experiments

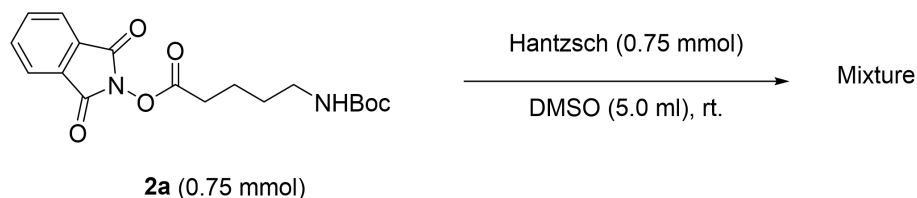

UV-vis absorption spectra of the reaction mixture in DMSO were measured to provide information on formation of EDA complex.

Solution 1: **2a** (271.8 mg, 0.75 mmol) was added in DMSO (5.0 mL). The mixture was stirred for 30 minutes under natural light conditions and then filtered.

Solution 2: HE (190.0 mg, 0.75 mmol) was added in DMSO (5.0 mL). The mixture

was stirred for 30 minutes under natural light conditions and then filtered.

Solution 3: **2a** (271.8 mg, 0.75 mmol) and HE (190.0 mg, 0.75 mmol) were added in DMSO (5.0 mL). The mixture was stirred for 30 minutes under natural light conditions and then filtered.

Performed on UV visible spectrophotometer, recorded in 1 cm path quartz cuvettes using T6 Xinyue visible spectrophotometer (PERSEETM).

| A<br>$\lambda/\text{nm}$ | <b>2a</b> +DMSO | HE+DMSO | <b>2a</b> + HE+DMSO |
|--------------------------|-----------------|---------|---------------------|
| 330                      | 2.028           | 2.235   | 2.787               |
| 340                      | 2.062           | 2.305   | 2.593               |
| 350                      | 1.420           | 2.502   | 2.591               |
| 360                      | 0.912           | 2.386   | 2.731               |
| 370                      | 0.857           | 2.122   | 2.585               |
| 380                      | 0.397           | 2.271   | 2.694               |
| 390                      | 0.169           | 2.221   | 2.794               |
| 400                      | 0.071           | 2.169   | 2.453               |
| 410                      | 0.044           | 2.028   | 2.432               |
| 420                      | 0.036           | 1.933   | 2.274               |
| 430                      | 0.028           | 1.986   | 2.345               |
| 440                      | 0.022           | 1.262   | 1.988               |
| 450                      | 0.018           | 0.256   | 1.129               |
| 460                      | 0.017           | 0.015   | 0.675               |
| 470                      | 0.016           | 0.001   | 0.447               |
| 480                      | 0.015           | 0.001   | 0.273               |
| 490                      | 0.014           | 0.001   | 0.170               |
| 500                      | 0.012           | 0.001   | 0.102               |
| 510                      | 0.011           | 0.001   | 0.059               |
| 520                      | 0.009           | 0.001   | 0.035               |
| 530                      | 0.008           | 0.000   | 0.021               |
| 540                      | 0.007           | 0.000   | 0.012               |
| 550                      | 0.007           | 0.000   | 0.008               |
| 560                      | 0.006           | 0.000   | 0.005               |



|     |       |       |       |
|-----|-------|-------|-------|
| 570 | 0.006 | 0.000 | 0.004 |
| 580 | 0.005 | 0.000 | 0.003 |
| 590 | 0.005 | 0.000 | 0.002 |
| 600 | 0.005 | 0.000 | 0.000 |

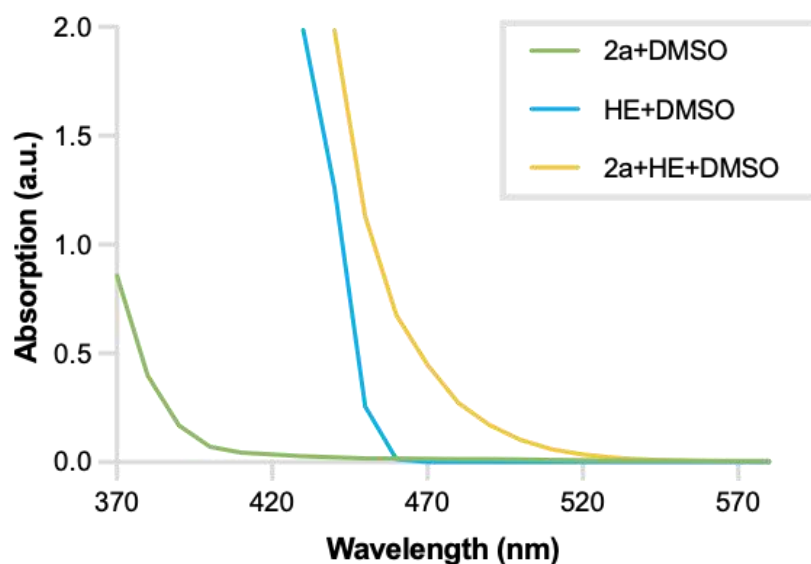

Figure S2. Optical absorption spectra studies.

## 6. Materials and methods of tumor cell growth inhibition test

### 6.1 Cell lines and culture condition

SK-Hep-1 cells (catalog number CL-0212, Wuhan, China) and A549 cells (catalog number STCC10201, Wuhan, China) were purchased from Wuhan Proxel Life Science and Technology Co., Ltd. and Wuhan Sewell Biotechnology Co., Ltd., respectively, and the complete medium consisted of MEM and Ham's F-12K basal medium (Servicebio Technology Co., Ltd., catalog numbers G4556-500 and G4560-500, Wuhan, China), 1% penicillin and streptomycin (Cellcook Biotech Co., Ltd., catalog numbers CM1005-005, Guangzhou, China), and 10% FBS (Procell Life Science & Technology Co., Ltd., catalog numbers 164210-50, Wuhan, China), respectively. The incubation environment was 37 °C and 5 per cent CO<sub>2</sub>.

### 6.2 Tumour cell growth inhibition assay

In vitro experiments were performed using SK-Hep-1 and A549 cells during the

logarithmic growth phase. SK-Hep-1 and A549 cells were seeded into 96-well plates at a density of  $5 \times 10^3$  cells per well. A range of concentrations of compounds (0, 2, 4, 8, 16, 32, and 64  $\mu\text{M}$ ) were used to assess proliferative effects on SK-Hep-1 and A549 cells. After 48 h of incubation, add 100  $\mu\text{l}$  of CCK-8-containing solution (medium to CCK-8 in a 9:1 ratio) (APExBIO, catalog number K1018, USA) and incubate at 37  $^\circ\text{C}$  for 1.5 h. The corresponding absorbance was detected at a wavelength of 450 nm. Absorbance values were converted to cell viability (%) by Microsoft Excel and visualized by GraphPad Prism 10 software.

## 7. Characterization data for the products

### *tert*-butyl (7,7,7-trifluoro-6-(4-(pyrrolidine-1-carbonyl)phenyl)heptyl)carbamate (3a)

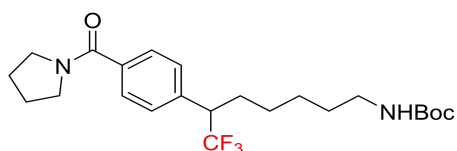

Obtained in 98% yield as a colorless oily liquid

(86.7 mg, eluent: PE/EA = 2:1).  $^1\text{H}$  NMR (400

MHz,  $\text{CDCl}_3$ )  $\delta$  7.48 (d,  $J = 8.0$  Hz, 2H), 7.27 (d,

$J = 8.0$  Hz, 2H), 4.53 (s, 1H), 3.61 (t,  $J = 6.4$  Hz, 2H), 3.41 (t,  $J = 6.4$  Hz, 2H), 3.24 –

3.15 (m, 1H), 3.03 – 2.98 (m, 2H), 1.89 (dt,  $J = 35.2, 6.8$  Hz, 6H), 1.39 (s, 9H), 1.36 –

1.32 (m, 2H), 1.28 – 1.20 (m, 2H), 1.16 – 1.12 (m, 2H).  $^{13}\text{C}$  NMR (101 MHz,  $\text{CDCl}_3$ )

$\delta$  169.3, 156.1, 137.1, 136.6, 129.0, 127.6, 126.8 (q,  $J = 280.8$  Hz), 79.1, 49.9 (q,  $J =$

26.7 Hz), 49.7, 46.3, 40.5, 29.9, 28.6, 28.5, 26.4, 24.5.  $^{19}\text{F}$  NMR (376 MHz,  $\text{CDCl}_3$ )  $\delta$

-69.60 – -69.73 (m, 3F). HRMS (ESI): calculated for  $\text{C}_{23}\text{H}_{34}\text{O}_3\text{N}_2\text{F}_3$  ( $[\text{M}+\text{H}]^+$ ):

443.2516; Found: 443.2521.

### methyl 4-(7-((*tert*-butoxycarbonyl)amino)-1,1,1-trifluoroheptan-2-yl)benzoate (3b)

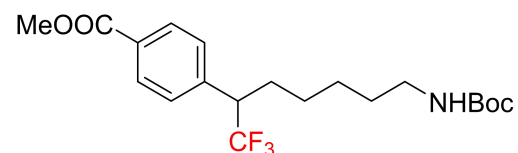

Obtained in 84% yield as a colorless oily

liquid (67.8 mg, eluent: PE/EA = 30:1).  $^1\text{H}$

NMR (400 MHz,  $\text{CDCl}_3$ )  $\delta$  8.02 (d,  $J = 8.0$

Hz, 2H), 7.35 (d,  $J = 8.0$  Hz, 2H), 4.48 (s, 1H), 3.91 (s, 3H), 3.32 – 3.22 (m, 1H), 3.06

– 3.01 (m, 2H), 2.05 – 1.97 (m, 1H), 1.91 – 1.81 (m, 1H), 1.42 (s, 9H), 1.39 – 1.35 (m,

2H), 1.33 – 1.22 (m, 2H), 1.21 – 1.11 (m, 2H).  $^{13}\text{C}$  NMR (101 MHz,  $\text{CDCl}_3$ )  $\delta$  166.8,

156.1, 140.0 (d,  $J = 2.0$  Hz), 130.2, 130.0 (d,  $J = 4.6$  Hz), 129.2, (d,  $J = 13.0$  Hz),

126.7 (q,  $J = 281.3$  Hz), 79.2, 52.3 (d,  $J = 16.7$  Hz), 50.1 (dd,  $J = 26.0, 4.5$  Hz), 40.4, 29.9, 28.7, 28.5, 28.4, 26.5.  $^{19}\text{F}$  NMR (376 MHz,  $\text{CDCl}_3$ )  $\delta$  -70.14 (d,  $J = 8.6$  Hz, 3F). **HRMS (ESI)**: calculated for  $\text{C}_{20}\text{H}_{28}\text{O}_4\text{NF}_3\text{Na}$  ( $[\text{M}+\text{Na}]^+$ ): 426.1863; Found: 426.1862.

***tert*-butyl (6-(4-acetylphenyl)-7,7,7-trifluoroheptyl)carbamate (3c)**

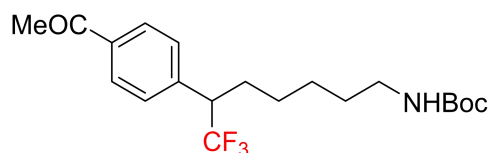

Obtained in 76% yield as a colorless oily liquid (58.9 mg, eluent: PE/EA = 5:1).  $^1\text{H}$  NMR (400 MHz,  $\text{CDCl}_3$ )  $\delta$  7.92 (dd,  $J = 8.0, 2.0$  Hz, 2H), 7.35 (d,  $J = 7.6$  Hz, 2H), 4.55 (s, 1H), 3.32 – 3.22 (m, 1H), 3.04 – 2.99 (m, 2H), 2.58 (d,  $J = 1.6$  Hz, 3H), 2.02 – 1.95 (m, 1H), 1.90 – 1.80 (m, 1H), 1.40 (s, 9H), 1.36 – 1.32 (m, 2H), 1.31 – 1.21 (m, 2H), 1.20 – 1.08 (m, 2H).  $^{13}\text{C}$  NMR (101 MHz,  $\text{CDCl}_3$ )  $\delta$  197.7, 156.1, 140.2 (d,  $J = 2.1$  Hz), 137.0, 129.3 (d,  $J = 13.7$  Hz), 128.8 (d,  $J = 1.9$  Hz), 126.6 (q,  $J = 281.1$  Hz), 79.2, 50.1 (dd,  $J = 26.1, 5.5$  Hz), 40.4, 29.8, 28.5, 28.4 (d,  $J = 8.9$  Hz), 26.8, 26.6, 26.4.  $^{19}\text{F}$  NMR (376 MHz,  $\text{CDCl}_3$ )  $\delta$  -69.50 (d,  $J = 9.0$  Hz, 3F). **HRMS (ESI)**: calculated for  $\text{C}_{20}\text{H}_{28}\text{O}_3\text{NF}_3\text{Na}$  ( $[\text{M}+\text{Na}]^+$ ): 410.1913; Found: 410.1917.

***tert*-butyl (7,7,7-trifluoro-6-(4-formylphenyl)heptyl)carbamate (3d)**

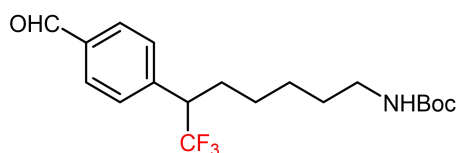

Obtained in 84% yield as a colorless oily liquid (62.7 mg, eluent: PE/EA = 5:1).  $^1\text{H}$  NMR (400 MHz,  $\text{CDCl}_3$ )  $\delta$  10.01 (s, 1H), 7.87 (d,  $J = 8.4$  Hz, 2H), 7.45 (d,  $J = 8.0$  Hz, 2H), 4.52 (s, 1H), 3.36 – 3.25 (m, 1H), 3.06 – 3.01 (m, 2H), 2.06 – 1.98 (m, 1H), 1.92 – 1.82 (m, 1H), 1.41 (s, 9H), 1.39 – 1.34 (m, 2H), 1.32 – 1.23 (m, 2H), 1.20 – 1.07 (m, 2H).  $^{13}\text{C}$  NMR (101 MHz,  $\text{CDCl}_3$ )  $\delta$  191.9 (d,  $J = 3.3$  Hz), 156.1, 141.7 (d,  $J = 2.2$  Hz), 136.3, 130.1, 129.8 (d,  $J = 10.4$  Hz), 126.6 (q,  $J = 281.6$  Hz), 79.2, 50.3 (q,  $J = 27.1$  Hz), 40.4, 29.9, 28.7, 28.5, 28.4, 26.5.  $^{19}\text{F}$  NMR (376 MHz,  $\text{CDCl}_3$ )  $\delta$  -69.42 (d,  $J = 8.3$  Hz, 3F). **HRMS (ESI)**: calculated for  $\text{C}_{19}\text{H}_{26}\text{O}_3\text{NF}_3\text{Na}$  ( $[\text{M}+\text{Na}]^+$ ): 396.1757; Found: 396.1761.

**tert-butyl (6-(3,5-dimethoxyphenyl)-7,7,7-trifluoroheptyl)carbamate (3e)**

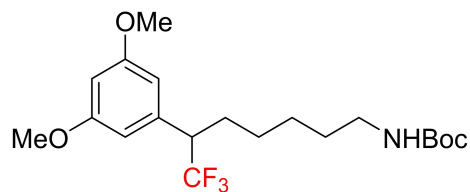

Obtained in 54% yield as a colorless oily liquid (43.7 mg, eluent: PE/EA = 10:1).  $^1\text{H NMR}$  (400 MHz,  $\text{CDCl}_3$ )  $\delta$  6.41 (s, 3H), 4.49 (s, 1H), 3.79 (s, 6H), 3.16 – 3.09 (m, 1H), 3.08 – 3.02 (m, 2H), 1.98 – 1.89 (m, 1H), 1.85 – 1.75 (m, 1H), 1.42 (s, 9H), 1.41 – 1.35 (m, 2H), 1.34 – 1.25 (m, 2H), 1.23 – 1.16 (m, 2H).  $^{13}\text{C NMR}$  (101 MHz,  $\text{CDCl}_3$ )  $\delta$  160.9, 156.1, 137.2 (d,  $J = 2.1$  Hz), 127.0 (q,  $J = 281.2$  Hz), 107.3 (d,  $J = 10.7$  Hz), 99.6 (d,  $J = 10.6$  Hz), 79.2, 55.4 (q,  $J = 13.7$  Hz), 50.3 (dd,  $J = 26.6, 8.5$  Hz), 40.5, 29.9, 28.8, 28.5 (d,  $J = 7.3$  Hz), 26.6, 26.5.  $^{19}\text{F NMR}$  (376 MHz,  $\text{CDCl}_3$ )  $\delta$  -69.62 (s, 3F). **HRMS (ESI)**: calculated for  $\text{C}_{20}\text{H}_{30}\text{O}_4\text{NF}_3\text{Na}$  ( $[\text{M}+\text{Na}]^+$ ): 428.2019; Found: 428.2018.

**tert-butyl (6-(benzo[d][1,3]dioxol-5-yl)-7,7,7-trifluoroheptyl)carbamate (3f)**

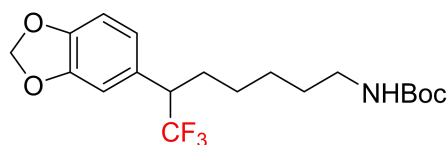

Obtained in 34% yield as a colorless oily liquid (26.5 mg, eluent: PE/EA = 20:1).  $^1\text{H NMR}$  (400 MHz,  $\text{CDCl}_3$ )  $\delta$  6.78 – 6.76 (m, 2H), 6.70 (d,  $J = 9.2$  Hz, 1H), 5.97 (d,  $J = 0.8$  Hz, 2H), 4.47 (s, 1H), 3.16 – 3.08 (m, 1H), 3.07 – 3.03 (m, 2H), 1.98 – 1.89 (m, 1H), 1.82 – 1.72 (m, 1H), 1.43 (s, 9H), 1.41 – 1.35 (m, 2H), 1.34 – 1.25 (m, 2H), 1.23 – 1.14 (m, 2H).  $^{13}\text{C NMR}$  (101 MHz,  $\text{CDCl}_3$ )  $\delta$  156.0, 148.0, 147.5, 128.4, 127.0 (q,  $J = 280.9$  Hz), 122.9, 108.7 (d,  $J = 6.7$  Hz), 108.4 (d,  $J = 3.8$  Hz), 101.3 (t,  $J = 19.2$  Hz), 79.1, 49.7 (dd,  $J = 25.8, 10.1$  Hz), 40.4, 29.9, 28.8, 28.6, 28.4 (d,  $J = 9.1$  Hz), 26.4.  $^{19}\text{F NMR}$  (376 MHz,  $\text{CDCl}_3$ )  $\delta$  -70.20 (d,  $J = 6.4$  Hz, 3F). **HRMS (ESI)**: calculated for  $\text{C}_{19}\text{H}_{26}\text{O}_4\text{NF}_3\text{Na}$  ( $[\text{M}+\text{Na}]^+$ ): 412.1706; Found: 412.1710.

**ethyl 5-(7-((tert-butoxycarbonyl)amino)-1,1,1-trifluoroheptan-2-yl)benzofuran-2-carboxylate (3g)**

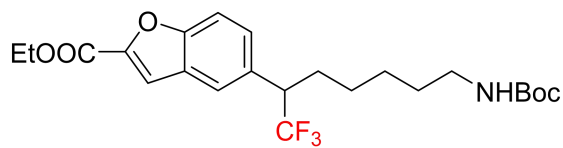

Obtained in 68% yield as a colorless oily liquid (62.4 mg, eluent: PE/EA = 10:1).  $^1\text{H NMR}$  (400 MHz,  $\text{CDCl}_3$ )  $\delta$

7.57 (d,  $J = 9.2$  Hz, 2H), 7.51 (s, 1H), 7.35 (d,  $J = 8.8$  Hz, 1H), 4.44 (q,  $J = 7.2$  Hz, 3H), 3.36 – 3.26 (m, 1H), 3.04 – 3.00 (m, 2H), 2.07 – 1.99 (m, 1H), 1.94 – 1.84 (m, 1H), 1.41 (s, 9H), 1.39 – 1.35 (m, 2H), 1.33 – 1.28 (m, 2H), 1.24 (s, 3H), 1.20 – 1.13 (m, 2H).  $^{13}\text{C}$  NMR (101 MHz,  $\text{CDCl}_3$ )  $\delta$  159.6, 156.1, 155.4, 146.5, 130.6 (d,  $J = 2.3$  Hz), 128.4 (d,  $J = 7.7$  Hz), 127.4, 127.0 (q,  $J = 281.4$  Hz), 123.4 (d,  $J = 6.8$  Hz), 113.8 (d,  $J = 9.3$  Hz), 112.7 – 112.6 (m), 79.2, 61.8, 50.0 (q,  $J = 26.7$  Hz), 40.5, 29.9 (d,  $J = 8.2$  Hz), 28.9, 28.5 (d,  $J = 5.1$  Hz), 26.54, 26.50, 14.4 (d,  $J = 5.3$  Hz).  $^{19}\text{F}$  NMR (376 MHz,  $\text{CDCl}_3$ )  $\delta$  -69.95 (d,  $J = 9.4$  Hz, 3F). **RMS (ESI):** calculated for  $\text{C}_{23}\text{H}_{30}\text{O}_5\text{NF}_3\text{Na}$  ( $[\text{M}+\text{Na}]^+$ ): 480.1968; Found: 480.1969.

***tert*-butyl (7,7,7-trifluoro-6-(1-methyl-1H-indol-5-yl)heptyl)carbamate (3h)**

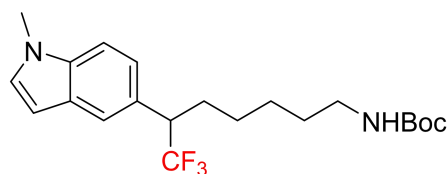

Obtained in 83% yield as a brown oily liquid (65.9 mg, eluent: PE/EA = 5:1).  $^1\text{H}$  NMR (400 MHz,  $\text{CDCl}_3$ )  $\delta$  7.54 (s, 1H), 7.31 (d,  $J = 8.8$  Hz, 1H), 7.14 (d,  $J = 8.4$  Hz, 1H), 7.07 (d,  $J = 2.8$  Hz, 1H), 6.49 – 6.48 (m, 1H), 4.50 (s, 1H), 3.78 (s, 3H), 3.37 – 3.25 (m, 1H), 3.03 (s, 2H), 2.08 – 1.90 (m, 2H), 1.44 (s, 9H), 1.40 – 1.35 (m, 2H), 1.33 – 1.26 (m, 2H), 1.24 – 1.16 (m, 2H).  $^{13}\text{C}$  NMR (101 MHz,  $\text{CDCl}_3$ )  $\delta$  156.1, 136.5, 129.6, 128.7, 127.5 (q,  $J = 281.3$  Hz), 125.6, 122.3, 121.6, 109.4, 101.1, 79.2, 50.2 (q,  $J = 26.3$  Hz), 40.6, 33.0, 29.9, 29.0, 28.5, 26.7, 26.6.  $^{19}\text{F}$  NMR (376 MHz,  $\text{CDCl}_3$ )  $\delta$  -69.91 (d,  $J = 9.4$  Hz, 3F). **HRMS (ESI):** calculated for  $\text{C}_{21}\text{H}_{30}\text{O}_2\text{N}_2\text{F}_3$  ( $[\text{M}+\text{H}]^+$ ): 399.2254; Found: 399.2257.

***tert*-butyl (6-(benzo[b]thiophen-3-yl)-7,7,7-trifluoroheptyl)carbamate (3i)**

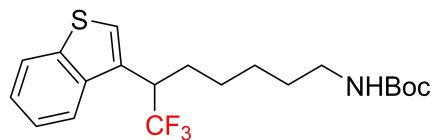

Obtained in 31% yield as a colorless oily liquid (24.9 mg, eluent: PE/EA = 30:1).  $^1\text{H}$  NMR (400 MHz,  $\text{CDCl}_3$ )  $\delta$  7.82 – 7.80 (m, 1H), 7.75 (dd,  $J = 6.8, 2.0$  Hz, 1H), 7.38 – 7.31 (m, 2H), 7.24 (s, 1H), 4.50 (s, 1H), 3.65 – 3.54 (m, 1H), 3.06 (q,  $J = 6.6$  Hz, 2H), 2.08 – 2.01 (m, 1H), 1.93 – 1.83 (m, 1H), 1.43 (s, 9H), 1.41 – 1.36 (m, 2H), 1.34 – 1.26 (m, 4H).  $^{13}\text{C}$  NMR (101 MHz,  $\text{CDCl}_3$ )  $\delta$  156.1, 139.7,

139.3, 137.8, 126.2 (q,  $J = 281.2$  Hz), 124.7, 124.6, 123.6, 122.4, 79.2, 46.4 (q,  $J = 28.3$  Hz), 40.5, 29.9, 29.7 (d,  $J = 2.0$  Hz), 28.5, 26.5, 26.4.  $^{19}\text{F}$  NMR (376 MHz,  $\text{CDCl}_3$ )  $\delta$  -71.18 – -71.22 (m, 3F). HRMS (ESI): calculated for  $\text{C}_{20}\text{H}_{26}\text{O}_2\text{NF}_3\text{NaS}$  ( $[\text{M}+\text{Na}]^+$ ): 424.1529; Found: 424.1535.

***tert*-butyl (7,7,7-trifluoro-6-(2-methoxyquinolin-6-yl)heptyl)carbamate (3j)**

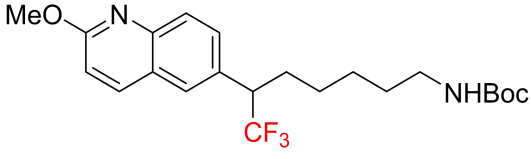 Obtained in 55% yield as a colorless oily liquid (46.8 mg, eluent: PE/EA = 15:1).  $^1\text{H}$  NMR (400 MHz,  $\text{CDCl}_3$ )  $\delta$  7.96 (d,  $J = 8.8$  Hz, 1H), 7.85 (d,  $J = 8.4$  Hz, 1H), 7.60 (s, 1H), 7.53 (d,  $J = 8.4$  Hz, 1H), 6.92 (d,  $J = 9.2$  Hz, 1H), 4.46 (s, 1H), 4.07 (s, 3H), 3.40 – 3.29 (m, 1H), 3.03 (q,  $J = 6.1$  Hz, 2H), 2.09 – 1.90 (m, 2H), 1.42 (s, 9H), 1.38 – 1.35 (m, 2H), 1.34 – 1.28 (m, 2H), 1.23 – 1.16 (m, 2H).  $^{13}\text{C}$  NMR (101 MHz,  $\text{CDCl}_3$ )  $\delta$  162.9, 156.1, 146.3, 138.8, 130.5 (d,  $J = 2.0$  Hz), 130.0, 128.2 (d,  $J = 4.9$  Hz), 127.8, 127.1 (q,  $J = 281.4$  Hz), 125.0, 113.7 (d,  $J = 6.0$  Hz), 79.2, 53.7 (d,  $J = 10.3$  Hz), 49.9 (q,  $J = 26.7$  Hz), 40.5, 29.9, 28.7, 28.5 (d,  $J = 4.0$  Hz), 26.6, 26.5.  $^{19}\text{F}$  NMR (376 MHz,  $\text{CDCl}_3$ )  $\delta$  -69.76 (d,  $J = 9.4$  Hz, 3F). HRMS (ESI): calculated for  $\text{C}_{22}\text{H}_{30}\text{O}_3\text{N}_2\text{F}_3$  ( $[\text{M}+\text{H}]^+$ ): 427.2203; Found: 427.2207.

***tert*-butyl (7,7,7-trifluoro-6-(quinolin-5-yl)heptyl)carbamate (3k)**

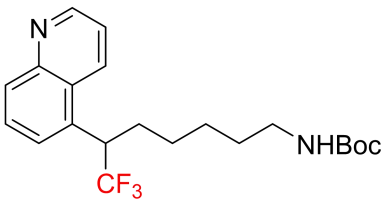 Obtained in 68% yield as a yellow solid (54.0 mg, eluent: PE/EA = 5:1), mp: 77 – 79 °C.  $^1\text{H}$  NMR (101 MHz,  $\text{CDCl}_3$ )  $\delta$  8.95 (s, 1H), 8.39 (d,  $J = 8.8$  Hz, 1H), 8.14 (d,  $J = 8.4$  Hz, 1H), 7.76 (t,  $J = 8.0$  Hz, 1H), 7.65 (d,  $J = 7.2$  Hz, 1H), 7.49 (dd,  $J = 8.8, 4.0$  Hz, 1H), 4.48 (s, 1H), 4.20 – 4.08 (m, 1H), 3.00 (q,  $J = 6.8$  Hz, 2H), 2.23 – 2.15 (m, 1H), 2.11 – 2.01 (m, 1H), 1.40 (s, 9H), 1.36 – 1.24 (m, 4H), 1.21 – 1.12 (m, 2H).  $^{13}\text{C}$  NMR (101 MHz,  $\text{CDCl}_3$ )  $\delta$  156.1, 150.2, 148.5, 131.4, 131.2, 130.1, 129.2, 128.1, 127.0 (d,  $J = 281.3$  Hz), 126.0, 121.6, 79.2, 42.7 (d,  $J = 27.6$  Hz), 40.4, 29.8, 29.3, 28.5, 26.6, 26.5.  $^{19}\text{F}$  NMR (376 MHz,  $\text{CDCl}_3$ )  $\delta$  -69.23

(s, 3F). **HRMS (ESI)**: calculated for  $C_{21}H_{28}O_2N_2F_3$  ( $[M+H]^+$ ): 397.2097; Found: 397.2099.

***tert*-butyl (7,7,7-trifluoro-6-(8-methoxyquinolin-2-yl)heptyl)carbamate (3l)**

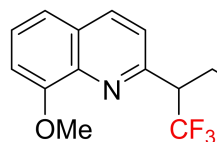

Obtained in 98% yield as a colorless oily liquid (83.6 mg, eluent: PE/EA = 6:1).  **$^1H$  NMR** (400 MHz,  $CDCl_3$ )  $\delta$  8.14 (d,  $J = 8.8$  Hz, 1H), 7.49 – 7.44 (m, 2H), 7.38 (d,  $J = 8.0$  Hz, 1H), 7.07 (d,  $J = 8.0$  Hz, 1H), 4.53 (s, 1H), 4.07 (s, 3H), 3.99 – 3.88 (m, 1H), 3.00 (s, 2H), 2.12 – 1.95 (m, 2H), 1.40 (s, 9H), 1.37 – 1.09 (m, 6H).  **$^{13}C$  NMR** (101 MHz,  $CDCl_3$ )  $\delta$  156.1, 155.5, 154.6 (d,  $J = 2.1$  Hz), 139.7, 137.2, 128.8, 127.1, 127.0 (q,  $J = 281.5$  Hz), 120.1, 119.5, 108.6, 79.1, 56.4, 53.2 (q,  $J = 26.2$  Hz), 40.5, 29.8, 28.8, 28.5, 26.6, 26.4.  **$^{19}F$  NMR** (376 MHz,  $CDCl_3$ )  $\delta$  -68.04 (d,  $J = 7.5$  Hz, 3F). **HRMS (ESI)**: calculated for  $C_{22}H_{30}O_3N_2F_3$  ( $[M+H]^+$ ): 427.2203; Found: 427.2205.

***tert*-butyl (7,7,7-trifluoro-6-(quinolin-3-yl)heptyl)carbamate (3m)**

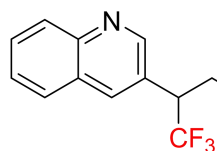

Obtained in 98% yield as a white solid (77.6 mg, eluent: PE/EA = 5:1), mp: 67 – 69°C.  **$^1H$  NMR** (400 MHz,  $CDCl_3$ )  $\delta$  8.80 (d,  $J = 2.4$  Hz, 1H), 8.13 – 8.08 (m, 2H), 7.82 (d,  $J = 8.0$  Hz, 1H), 7.72 (ddd,  $J = 8.4, 6.8, 1.2$  Hz, 1H), 7.56 (t,  $J = 7.4$  Hz, 1H), 4.59 (s, 1H), 3.48 – 3.38 (m, 1H), 3.02 (q,  $J = 6.1$  Hz, 2H), 2.15 – 2.06 (m, 1H), 2.03 – 1.93 (m, 1H), 1.39 (s, 9H), 1.37 – 1.14 (m, 6H).  **$^{13}C$  NMR** (101 MHz,  $CDCl_3$ )  $\delta$  156.1, 151.0, 147.9, 136.1, 130.1, 129.2, 127.9, 127.86, 127.79, 127.3, 126.7 (q,  $J = 281.0$  Hz), 79.1, 48.0 (q,  $J = 27.3$  Hz), 40.4, 29.8, 28.5, 28.4, 26.5, 26.4.  **$^{19}F$  NMR** (376 MHz,  $CDCl_3$ )  $\delta$  -69.23 (s, 3F). **HRMS (ESI)**: calculated for  $C_{21}H_{28}O_2N_2F_3$  ( $[M+H]^+$ ): 397.2097; Found: 397.2098.

***tert*-butyl (7,7,7-trifluoro-6-(2-oxo-1,2-dihydroquinolin-6-yl)heptyl)carbamate (3n)**

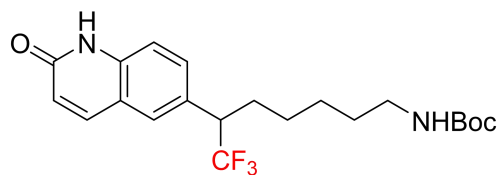

Obtained in 51% yield as a colorless oily liquid (42.2 mg, eluent: PE/EA = 2:1).  $^1\text{H}$  NMR (400 MHz,  $\text{CDCl}_3$ )  $\delta$  12.74 (s, 1H), 7.81 (d,  $J = 9.2$  Hz, 1H), 7.47 – 7.40 (m, 3H), 6.74 (d,  $J = 9.6$  Hz, 1H), 4.52 (s, 1H), 3.32 – 3.21 (m, 1H), 3.03 (t,  $J = 7.0$  Hz, 2H), 2.06 – 1.98 (m, 1H), 1.92 – 1.82 (m, 1H), 1.41 (s, 9H), 1.39 – 1.35 (m, 2H), 1.32 – 1.25 (m, 2H), 1.23 – 1.14 (m, 2H).  $^{13}\text{C}$  NMR (101 MHz,  $\text{CDCl}_3$ )  $\delta$  164.8, 156.1, 141.0, 138.4, 131.2, 129.3, 128.3, 126.9 (q,  $J = 280.3$  Hz), 122.0, 120.1, 116.8, 79.2, 49.6 (q,  $J = 26.8$  Hz), 40.5, 29.9, 28.7, 28.5, 26.52, 26.48.  $^{19}\text{F}$  NMR (376 MHz,  $\text{CDCl}_3$ )  $\delta$  -69.95 (s, 3F). HRMS (ESI): calculated for  $\text{C}_{21}\text{H}_{27}\text{O}_3\text{N}_2\text{F}_3 \text{ Na}$  ( $[\text{M}+\text{Na}]^+$ ): 435.1866; Found: 435.1870.

**tert-butyl (9-phenyl-6-(trifluoromethyl)nonyl)carbamate (3o)**

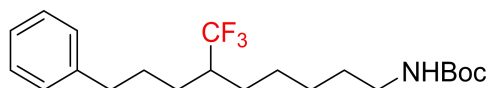

Obtained in 57% yield as a colorless oily liquid (44.0 mg, eluent: PE/EA = 50:1).  $^1\text{H}$  NMR (400 MHz,  $\text{CDCl}_3$ )  $\delta$  7.29 (t,  $J = 7.4$  Hz, 2H), 7.19 (t,  $J = 8.4$  Hz, 3H), 4.56 (s, 1H), 3.10 (q,  $J = 6.5$  Hz, 2H), 2.62 (t,  $J = 7.4$  Hz, 2H), 2.09 – 1.97 (m, 1H), 1.74 – 1.66 (m, 2H), 1.65 – 1.54 (m, 2H), 1.51 – 1.41 (m, 13H), 1.39 – 1.27 (m, 4H).  $^{13}\text{C}$  NMR (101 MHz,  $\text{CDCl}_3$ )  $\delta$  156.1, 141.9, 128.7 (q,  $J = 281.4$  Hz), 128.5, 128.4, 126.0, 79.2, 42.5 (q,  $J = 24.9$  Hz), 40.6, 36.0, 30.0, 28.7, 28.5, 27.8 (d,  $J = 2.5$  Hz), 27.5 (d,  $J = 2.5$  Hz), 27.0, 26.6.  $^{19}\text{F}$  NMR (376 MHz,  $\text{CDCl}_3$ )  $\delta$  -69.99 (d,  $J = 9.8$  Hz, 3F). HRMS (ESI): calculated for  $\text{C}_{21}\text{H}_{32}\text{O}_2\text{NF}_3\text{Na}$  ( $[\text{M}+\text{Na}]^+$ ): 410.2277; Found: 410.2283.

**tert-butyl (8-(p-tolyl)-6-(trifluoromethyl)octyl)carbamate (3p)**

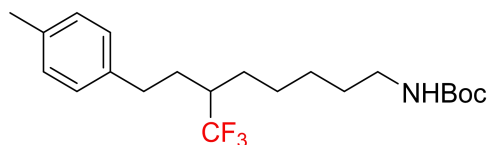

Obtained in 46% yield as a colorless oily liquid (35.6 mg, eluent: PE/EA = 80:1).  $^1\text{H}$  NMR (400 MHz,  $\text{CDCl}_3$ )  $\delta$  7.09 (t,  $J = 8.4$  Hz, 4H), 4.52 (s, 1H), 3.10 (q,  $J = 6.4$  Hz, 2H), 2.65 (t,  $J = 8.0$  Hz, 2H), 2.32 (s, 3H), 2.09 – 1.99 (m, 1H), 1.96 – 1.87 (m, 1H), 1.75 – 1.68 (m, 1H), 1.66 – 1.57 (m, 1H), 1.50 –



1.41 (m, 12H), 1.40 – 1.34 (m, 2H), 1.31 – 1.28 (m, 2H).  $^{13}\text{C}$  NMR (101 MHz,  $\text{CDCl}_3$ )  $\delta$  156.1, 138.3, 135.7, 128.84 (d,  $J = 95.3$  Hz), 128.76 (d,  $J = 281.2$  Hz), 72.9, 41.9 (d,  $J = 24.9$  Hz), 40.6, 32.7, 30.0, 29.8 (d,  $J = 1.8$  Hz), 28.5, 27.9 (d,  $J = 2.2$  Hz), 27.0, 26.5, 21.1.  $^{19}\text{F}$  NMR (376 MHz,  $\text{CDCl}_3$ )  $\delta$  -69.86 (d,  $J = 7.5$  Hz, 3F). HRMS (ESI): calculated for  $\text{C}_{21}\text{H}_{32}\text{O}_2\text{NF}_3\text{Na}$  ( $[\text{M}+\text{Na}]^+$ ): 410.2277; Found: 410.2283.

**methyl 4-(8-((*tert*-butoxycarbonyl)amino)-3-(trifluoromethyl)octyl)benzoate (3q)**

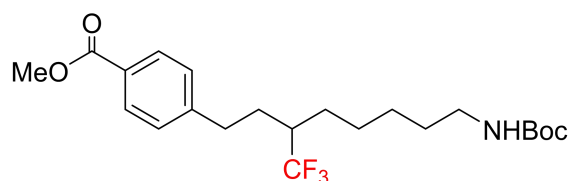

Obtained in 62% yield as a colorless oily liquid (53.5 mg, eluent: PE/EA = 20:1).  $^1\text{H}$  NMR (400 MHz,  $\text{CDCl}_3$ )  $\delta$  7.93 (d,  $J = 8.0$  Hz, 2H), 7.21 (d,  $J = 8.0$  Hz, 2H), 4.66 (s, 1H), 3.86 (s, 3H), 3.08 (q,  $J = 6.9$  Hz, 2H), 2.71 (t,  $J = 8.0$  Hz, 2H), 2.06 – 1.96 (m, 1H), 1.94 – 1.85 (m, 1H), 1.75 – 1.66 (m, 1H), 1.63 – 1.55 (m, 1H), 1.47 – 1.40 (m, 12H), 1.36 – 1.30 (m, 2H), 1.28 – 1.25 (m, 2H).  $^{13}\text{C}$  NMR (101 MHz,  $\text{CDCl}_3$ )  $\delta$  167.0, 156.1, 146.7, 129.9, 128.5 (q,  $J = 281.9$  Hz), 128.4, 128.2, 79.0, 52.0, 41.9 (q,  $J = 25.1$  Hz), 40.4, 33.0, 29.9, 29.3, 28.4, 27.8 (d,  $J = 2.5$  Hz), 26.8, 26.4.  $^{19}\text{F}$  NMR (376 MHz,  $\text{CDCl}_3$ )  $\delta$  -69.85 (s, 3F). HRMS (ESI): calculated for  $\text{C}_{22}\text{H}_{32}\text{O}_4\text{NF}_3\text{Na}$  ( $[\text{M}+\text{Na}]^+$ ): 454.2176; Found: 454.2181.

***tert*-butyl (9-(1,3-dioxoisindolin-2-yl)-6-(trifluoromethyl)nonyl)carbamate (3r)**

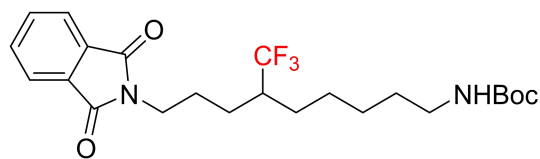

Obtained in 40% yield as a colorless oily liquid (36.5 mg, eluent: PE/EA = 8:1).  $^1\text{H}$  NMR (400 MHz,  $\text{CDCl}_3$ )  $\delta$  7.86 – 7.84 (m, 2H), 7.73 – 7.71 (m, 2H), 4.55 (s, 1H), 3.68 (t,  $J = 7.2$  Hz, 2H), 3.09 (q,  $J = 6.7$  Hz, 2H), 2.07 – 2.03 (m, 1H), 1.80 – 1.73 (m, 2H), 1.68 – 1.56 (m, 3H), 1.52 – 1.45 (m, 3H), 1.43 (s, 9H), 1.37 – 1.28 (m, 4H).  $^{13}\text{C}$  NMR (101 MHz,  $\text{CDCl}_3$ )  $\delta$  168.5, 156.1, 134.1, 132.1, 128.5 (q,  $J = 281.4$  Hz), 123.4, 79.1, 42.2 (q,  $J = 25.0$  Hz), 40.5, 37.8, 29.9, 28.5, 27.8, 26.9, 26.6, 25.9, 25.2.  $^{19}\text{F}$  NMR (376 MHz,  $\text{CDCl}_3$ )  $\delta$  -69.97 (d,  $J = 9.4$  Hz, 3F). HRMS (ESI): calculated for  $\text{C}_{23}\text{H}_{31}\text{O}_4\text{N}_2\text{F}_3\text{Na}$  ( $[\text{M}+\text{Na}]^+$ ): 479.2128; Found: 479.2130.

**(4-(3-cycloheptyl-1,1,1-trifluoropropan-2-yl)phenyl)(pyrrolidin-1-yl)methanone**

**(4a)**

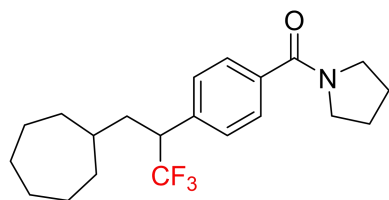

Obtained in 89% yield as a white solid (65.4 mg, eluent: PE/EA = 8:1), mp: 48 – 50 °C. <sup>1</sup>H NMR (400 MHz, CDCl<sub>3</sub>) δ 7.49 (d, *J* = 8.0 Hz, 2H), 7.28 (d, *J* = 7.6 Hz, 2H), 3.62 (s, 2H), 3.42 (s, 2H), 3.37 – 3.27 (m, 1H), 1.93 (d, *J* = 4.8 Hz, 2H), 1.84 (d, *J* = 4.4 Hz, 2H), 1.80 (t, *J* = 6.8 Hz, 2H), 1.66 – 1.60 (m, 1H), 1.59 – 1.50 (m, 3H), 1.48 – 1.37 (m, 4H), 1.32 – 1.07 (m, 5H). <sup>13</sup>C NMR (101 MHz, CDCl<sub>3</sub>) δ 169.3, 136.9, 136.8, 129.2 (d, *J* = 1.8 Hz), 129.0, 127.6, 127.4 (d, *J* = 3.6 Hz), 127.1 (q, *J* = 281.2 Hz), 49.7, 48.1 – 47.3 (m), 46.4 – 46.2 (m), 36.3 (q, *J* = 12.8 Hz), 35.7, 35.2, 32.4 (d, *J* = 10.6 Hz), 28.6, 28.4, 26.5, 26.1, 25.8, 24.5. <sup>19</sup>F NMR (376 MHz, CDCl<sub>3</sub>) δ -69.64 (d, *J* = 9.4 Hz, 3F). HRMS (ESI): calculated for C<sub>21</sub>H<sub>29</sub>ONF<sub>3</sub> ([M+H]<sup>+</sup>): 368.2196; Found: 368.2195.

**pyrrolidin-1-yl(4-(1,1,1-trifluoro-3-(1-methylcyclohexyl)propan-2-yl)phenyl)methanone (4b)**

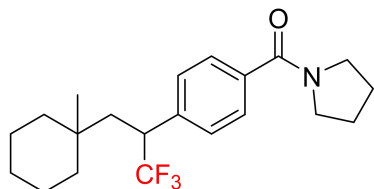

Obtained in 85% yield as a colorless oily liquid (62.4 mg, eluent: PE/EA = 8:1). <sup>1</sup>H NMR (400 MHz, CDCl<sub>3</sub>) δ 7.47 (d, *J* = 8.0 Hz, 2H), 7.34 (d, *J* = 8.0 Hz, 2H), 3.61 (t, *J* = 7.0 Hz, 2H), 3.39 (t, *J* = 6.6 Hz, 2H), 3.36 – 3.29 (m, 1H), 1.96 – 1.90 (m, 4H), 1.87 – 1.80 (m, 2H), 1.45 – 1.32 (m, 3H), 1.24 – 1.21 (m, 5H), 1.05 – 0.94 (m, 2H), 0.70 (s, 3H). <sup>13</sup>C NMR (101 MHz, CDCl<sub>3</sub>) δ 169.3, 138.9, 136.8, 129.4, 127.4, 127.2 (q, *J* = 281.0 Hz), 49.7, 46.3, 45.9 (q, *J* = 26.4 Hz), 40.7, 38.0 (d, *J* = 10.0 Hz), 33.2, 26.4, 26.2, 25.0, 24.5, 21.8 (d, *J* = 9.0 Hz). <sup>19</sup>F NMR (376 MHz, CDCl<sub>3</sub>) δ -70.07 (d, *J* = 9.8 Hz, 3F). HRMS (ESI): calculated for C<sub>21</sub>H<sub>29</sub>ONF<sub>3</sub> ([M+H]<sup>+</sup>): 368.2196; Found: 368.2194.

**pyrrolidin-1-yl(4-(1,1,1-trifluoro-3-(tetrahydro-2H-pyran-4-yl)propan-2-yl)phenyl)methanone (4c)**

**yl)phenyl)methanone (4c)**

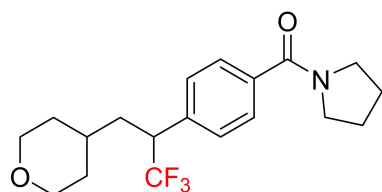

Obtained in 73% yield as a light blue oily liquid (51.9 mg, eluent: PE/EA = 1:1).  $^1\text{H NMR}$  (400 MHz,  $\text{CDCl}_3$ )  $\delta$  7.50 (d,  $J = 8.4$  Hz, 2H), 7.29 (d,  $J = 8.0$  Hz, 2H), 3.85 (t,  $J = 10.8$  Hz, 2H), 3.62 (t,  $J = 7.0$  Hz, 2H), 3.41 (t,  $J = 6.6$  Hz, 2H), 3.39 – 3.31 (m, 1H), 3.24 – 3.13 (m, 2H), 1.97 – 1.76 (m, 6H), 1.54 (d,  $J = 9.2$  Hz, 1H), 1.41 (d,  $J = 12.0$  Hz, 1H), 1.34 – 1.17 (m, 3H).  $^{13}\text{C NMR}$  (101 MHz,  $\text{CDCl}_3$ )  $\delta$  169.2, 137.3, 136.3, 129.0, 127.7, 126.9 (q,  $J = 281.1$  Hz), 67.6 (d,  $J = 17.4$  Hz), 49.7, 46.7 (q,  $J = 26.8$  Hz), 46.3, 35.5, 33.6, 31.6 (d,  $J = 31.5$  Hz), 26.5, 24.5.  $^{19}\text{F NMR}$  (376 MHz,  $\text{CDCl}_3$ )  $\delta$  -69.77 (d,  $J = 9.0$  Hz, 3F). **HRMS (ESI)**: calculated for  $\text{C}_{19}\text{H}_{25}\text{O}_2\text{NF}_3$  ( $[\text{M}+\text{H}]^+$ ): 356.1832; Found: 356.1827.

**tert-butyl 4-(3,3,3-trifluoro-2-(4-(pyrrolidine-1-carbonyl)phenyl)propyl)piperidine-1-carboxylate (4d)**

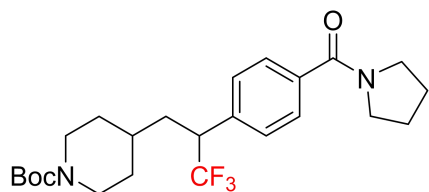

Obtained in 93% yield as a colorless oily liquid (84.6 mg, eluent: PE/EA = 2:1).  $^1\text{H NMR}$  (400 MHz,  $\text{CDCl}_3$ )  $\delta$  7.50 (d,  $J = 7.6$  Hz, 2H), 7.29 (d,  $J = 7.6$  Hz, 2H), 3.99 (t,  $J = 13.2$  Hz, 2H), 3.62 (t,  $J = 6.8$  Hz, 2H), 3.41 (t,  $J = 6.8$  Hz, 2H), 3.38 – 3.30 (m, 1H), 2.55 – 2.42 (m, 2H), 1.96 – 1.84 (m, 5H), 1.80 – 1.73 (m, 1H), 1.61 (d,  $J = 12.4$  Hz, 1H), 1.46 (d,  $J = 12.0$  Hz, 1H), 1.40 (s, 9H), 1.17 – 0.98 (m, 3H).  $^{13}\text{C NMR}$  (101 MHz,  $\text{CDCl}_3$ )  $\delta$  169.2, 154.8, 137.3, 136.3, 129.0, 127.7, 126.8 (q,  $J = 281.0$  Hz), 79.4, 49.7, 47.0 (q,  $J = 26.9$  Hz), 46.3, 35.2, 32.9, 32.5, 30.8, 28.5, 26.5, 24.5.  $^{19}\text{F NMR}$  (376 MHz,  $\text{CDCl}_3$ )  $\delta$  -69.81 (d,  $J = 9.0$  Hz, 3F). **HRMS (ESI)**: calculated for  $\text{C}_{24}\text{H}_{34}\text{O}_3\text{N}_2\text{F}_3$  ( $[\text{M}+\text{H}]^+$ ): 455.2516; Found: 455.2519.

**pyrrolidin-1-yl(4-(1,1,1-trifluoro-4-(1H-indol-3-yl)butan-2-yl)phenyl)methanone (4e)**

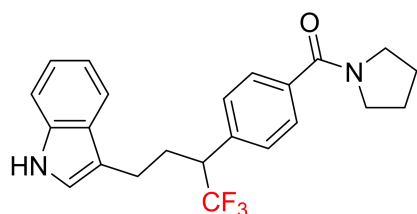

Obtained in 86% yield as a Light brown solid (68.9 mg, eluent: PE/EA = 1:1), mp: 163 – 165°C.  $^1\text{H NMR}$

**NMR** (400 MHz, CDCl<sub>3</sub>)  $\delta$  8.73 (s, 1H), 7.57 (d,  $J$  = 8.0 Hz, 2H), 7.47 (d,  $J$  = 8.0 Hz, 1H), 7.34 (d,  $J$  = 8.0 Hz, 2H), 7.32 (d,  $J$  = 8.0 Hz, 1H), 7.18 (t,  $J$  = 7.6 Hz, 1H), 7.09 (t,  $J$  = 7.6 Hz, 1H), 6.80 (s, 1H), 3.70 (t,  $J$  = 7.0 Hz, 2H), 3.46 (t,  $J$  = 6.6 Hz, 2H), 3.39 – 3.28 (m, 1H), 2.76 – 2.69 (m, 1H), 2.59 – 2.43 (m, 2H), 2.34 – 2.23 (m, 1H), 2.01 – 1.85 (m, 4H). **<sup>13</sup>C NMR** (101 MHz, CDCl<sub>3</sub>)  $\delta$  169.4, 136.9, 136.6, 136.5, 129.3, 127.5, 127.1, 126.9 (q,  $J$  = 281.0 Hz), 121.9, 121.8, 119.1, 118.6, 114.0, 111.4, 49.7, 49.1 (q,  $J$  = 26.7 Hz), 46.4, 28.8, 26.4, 24.4, 22.0. **<sup>19</sup>F NMR** (376 MHz, CDCl<sub>3</sub>)  $\delta$  -69.29 (d,  $J$  = 9.0 Hz, 3F). **HRMS (ESI)**: calculated for C<sub>23</sub>H<sub>24</sub>ON<sub>2</sub>F<sub>3</sub> ([M+H]<sup>+</sup>): 401.1835; Found: 401.1839.

**(4-(4-((3*r*,5*r*,7*r*)-adamantan-1-yl)-1,1,1-trifluorobutan-2-yl)phenyl)(pyrrolidin-1-yl)methanone (4f)**

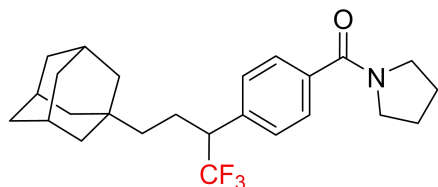

Obtained in 72% yield as a colorless oily liquid (60.7 mg, eluent: PE/EA = 15:1). **<sup>1</sup>H NMR** (400 MHz, CDCl<sub>3</sub>)  $\delta$  7.50 (d,  $J$  = 8.0 Hz, 2H), 7.28 (d,  $J$  = 8.0 Hz, 2H), 3.54 (d,  $J$  = 71.6 Hz, 4H), 3.18 – 3.07 (m, 1H), 2.03 – 1.74 (m, 9H), 1.618 (d,  $J$  = 49.2 Hz, 2H), 1.617 (d,  $J$  = 25.6 Hz, 4H), 1.38 (t,  $J$  = 14.2 Hz, 6H), 0.93 (td,  $J$  = 11.6, 4.8 Hz, 1H), 0.80 (td,  $J$  = 12.8, 4.4 Hz, 1H). **<sup>13</sup>C NMR** (101 MHz, CDCl<sub>3</sub>)  $\delta$  169.4, 137.0, 136.8, 129.1 (d,  $J$  = 24.4 Hz), 127.6 (d,  $J$  = 15.5 Hz), 126.9 (q,  $J$  = 281.1 Hz), 51.0 – 50.6 (m), 46.4, 42.2 (t,  $J$  = 14.3 Hz), 41.4, 37.2 (t,  $J$  = 16.3 Hz), 32.1, 28.7 (d,  $J$  = 12.2 Hz), 25.5 (d,  $J$  = 191.5 Hz), 21.7 (t,  $J$  = 11.1 Hz). **<sup>19</sup>F NMR** (376 MHz, CDCl<sub>3</sub>)  $\delta$  -69.69 (d,  $J$  = 9.0 Hz, 3F). **HRMS (ESI)**: calculated for C<sub>25</sub>H<sub>33</sub>ONF<sub>3</sub> ([M+H]<sup>+</sup>): 420.2509; Found: 420.2516.

**pyrrolidin-1-yl(4-(1,1,1-trifluorodecan-2-yl)phenyl)methanone (4g)**

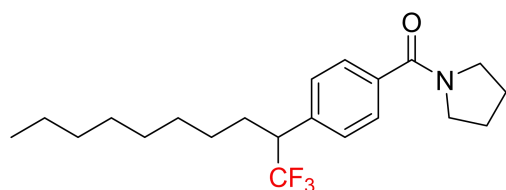

Obtained in 73% yield as a colorless oily liquid (53.6 mg, eluent: PE/EA = 7:1). **<sup>1</sup>H NMR** (400 MHz, CDCl<sub>3</sub>)  $\delta$  7.50 (d,  $J$  = 7.6 Hz, 2H), 7.29 (d,  $J$  = 7.6 Hz, 2H), 3.63 (t,  $J$  = 7.0 Hz, 2H), 3.42 (t,  $J$  = 7.0 Hz, 2H), 3.27 – 3.16 (m, 1H), 2.01 – 1.91 (m, 3H), 1.89 – 1.78 (m, 3H), 1.26 – 1.23 (m, 4H),

1.19 (s, 6H), 1.14 – 1.08 (m, 2H), 0.84 (t,  $J = 6.8$  Hz, 3H).  $^{13}\text{C}$  NMR (101 MHz,  $\text{CDCl}_3$ )  $\delta$  169.4, 137.0, 136.9, 129.1, 127.5, 126.9 (q,  $J = 281.1$  Hz), 50.0 (q,  $J = 26.6$  Hz), 49.7, 46.3, 31.9, 29.3, 29.2 (d,  $J = 1.8$  Hz), 28.6 (d,  $J = 1.1$  Hz), 26.7, 26.5, 24.5, 22.7, 14.2.  $^{19}\text{F}$  NMR (376 MHz,  $\text{CDCl}_3$ )  $\delta$  -69.68 (d,  $J = 9.4$  Hz, 3F). HRMS (ESI): calculated for  $\text{C}_{21}\text{H}_{31}\text{ONF}_3$  ( $[\text{M}+\text{H}]^+$ ): 370.2352; Found: 370.2349.

**pyrrolidin-1-yl(4-(1,1,1-trifluoro-5-(naphthalen-2-yl)pentan-2-yl)phenyl)methanone (4h)**

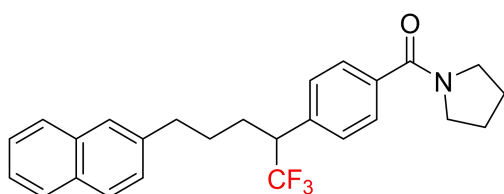

Obtained in 96% yield as a colorless oily liquid (81.1 mg, eluent: PE/EA = 6:1).  $^1\text{H}$  NMR (400 MHz,  $\text{CDCl}_3$ )  $\delta$  7.81 (m, 3H), 7.53 (d,  $J = 5.6$  Hz, 2H), 7.50 (s, 1H), 7.47 – 7.40 (m, 2H), 7.29 (d,  $J = 8.0$  Hz, 2H), 7.23 (d,  $J = 8.4$  Hz, 1H), 3.65 (s, 2H), 3.41 (s, 2H), 3.34 – 3.23 (m, 1H), 2.75 (m, 2H), 2.13 – 2.04 (m, 1H), 1.98 – 1.85 (m, 5H), 1.66 – 1.52 (m, 2H).  $^{13}\text{C}$  NMR (101 MHz,  $\text{CDCl}_3$ )  $\delta$  169.2, 139.0, 137.1, 136.5, 133.6, 132.1, 129.0, 128.0, 127.65, 127.57, 127.4, 127.1, 126.8 (q,  $J = 281.2$  Hz), 126.5, 126.0, 125.3, 49.9 (q,  $J = 26.7$  Hz), 49.6, 46.3, 35.6, 28.3, 28.2, 26.4, 24.5.  $^{19}\text{F}$  NMR (376 MHz,  $\text{CDCl}_3$ )  $\delta$  -69.50 (d,  $J = 9.0$  Hz, 3F). HRMS (ESI): calculated for  $\text{C}_{26}\text{H}_{27}\text{ONF}_3$  ( $[\text{M}+\text{H}]^+$ ): 426.2039; Found: 426.2043.

**tert-butyl (1-(3,3,3-trifluoro-2-(4-(pyrrolidine-1-carbonyl)phenyl)propyl)cyclopropyl)carbamate (4i)**

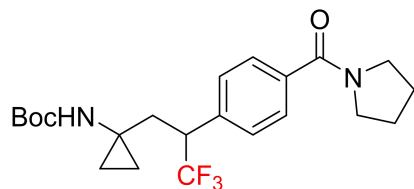

Obtained in 87% yield as a white solid (74.2 mg, eluent: PE/EA = 1:1), mp: 106 – 108 °C.  $^1\text{H}$  NMR (400 MHz,  $\text{CDCl}_3$ )  $\delta$  7.46 (d,  $J = 8.0$  Hz, 2H), 7.31 (d,  $J = 7.6$  Hz, 2H), 4.73 (s, 1H), 3.58 (t,  $J = 7.0$  Hz, 2H), 3.55 – 3.49 (m, 1H), 3.37 (d,  $J = 6.6$  Hz, 2H), 2.26 (d,  $J = 14.8$  Hz, 1H), 2.09 – 2.03 (m, 1H), 1.94 – 1.87 (m, 2H), 1.84 – 1.78 (m, 2H), 1.33 (s, 9H), 0.68 – 0.27 (m, 4H).  $^{13}\text{C}$  NMR (101 MHz,  $\text{CDCl}_3$ )  $\delta$

169.1, 155.3, 137.5, 137.0, 128.9, 127.6, 126.7 (q,  $J = 280.9$  Hz), 79.4, 49.6, 46.2, 36.1, 31.5, 28.3, 26.4, 24.4, 15.0, 13.5.  $^{19}\text{F}$  NMR (376 MHz,  $\text{CDCl}_3$ )  $\delta$  -69.21 (d,  $J = 7.5$  Hz, 3F). HRMS (ESI): calculated for  $\text{C}_{22}\text{H}_{30}\text{O}_3\text{N}_2\text{F}_3$  ( $[\text{M}+\text{H}]^+$ ): 427.2203; Found: 427.2204.

***tert*-butyl((2*S*)-5,5,5-trifluoro-1-phenyl-4-(4-(pyrrolidine-1-carbonyl)phenyl)pentan-2-yl)carbamate (4j)**

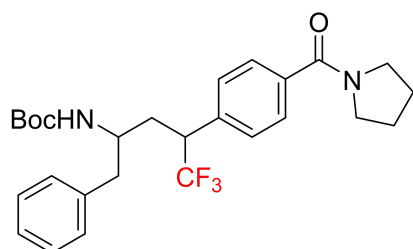

Obtained in 82% yield as a white solid (80.4 mg, eluent: PE/EA = 5:1), mp: 129 – 131 °C.  $^1\text{H}$  NMR (400 MHz,  $\text{CDCl}_3$ )  $\delta$  7.49 (d,  $J = 7.6$  Hz, 2H), 7.27 (q,  $J = 7.5$  Hz, 4H), 7.22 – 7.16 (m, 1H), 7.07 (d,  $J = 7.2$  Hz, 2H), 4.26 (d,  $J = 8.8$  Hz, 1H), 3.86 – 3.81 (m, 1H), 3.63 (t,  $J = 7.0$  Hz, 2H), 3.42 (t,  $J = 5.8$  Hz, 3H), 2.74 (s, 2H), 2.26 – 2.19 (m, 1H), 2.05 – 1.82 (m, 5H), 1.33 (s, 9H).  $^{13}\text{C}$  NMR (101 MHz,  $\text{CDCl}_3$ )  $\delta$  169.1, 155.1, 137.3, 137.2, 136.9, 129.4, 129.0, 128.6, 127.7, 126.7 (q,  $J = 281.0$  Hz), 126.69, 79.4, 50.4, 49.7, 46.3, 40.7, 34.0, 28.4, 26.5, 24.5.  $^{19}\text{F}$  NMR (376 MHz,  $\text{CDCl}_3$ )  $\delta$  -69.40 (d,  $J = 8.6$  Hz, 3F). HRMS (ESI): calculated for  $\text{C}_{27}\text{H}_{34}\text{O}_3\text{N}_2\text{F}_3$  ( $[\text{M}+\text{H}]^+$ ): 491.2516; Found: 491.2522.

***N*-(5,5,5-trifluoro-4-(4-(pyrrolidine-1-carbonyl)phenyl)pentyl)benzamide (4k)**

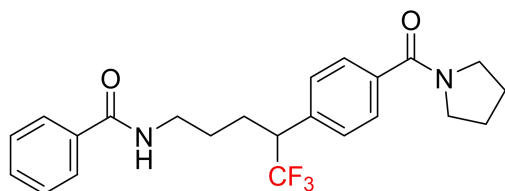

Obtained in 53% yield as a colorless oily liquid (44.3 mg, eluent: PE/EA = 1:3).  $^1\text{H}$  NMR (400 MHz,  $\text{CDCl}_3$ )  $\delta$  7.74 (d,  $J = 7.6$  Hz, 2H), 7.46 – 7.34 (m, 5H), 7.24 (d,  $J = 7.6$  Hz, 2H), 6.87 (s, 1H), 3.59 (t,  $J = 7.0$  Hz, 2H), 3.39 (t,  $J = 6.6$  Hz, 2H), 3.35 – 3.21 (m, 3H), 2.08 – 1.79 (m, 6H), 1.50 – 1.20 (m, 2H).  $^{13}\text{C}$  NMR (101 MHz,  $\text{CDCl}_3$ )  $\delta$  169.2, 167.7, 137.1, 136.3, 134.5, 131.4, 129.0, 128.5, 127.5, 127.1, 126.7 (q,  $J = 280.9$  Hz), 49.7, 49.6 (q,  $J = 26.9$  Hz), 46.3,

39.3, 26.9, 26.4, 26.1, 24.5.  $^{19}\text{F}$  NMR (376 MHz,  $\text{CDCl}_3$ )  $\delta$  -69.58 (d,  $J$  = 9.0 Hz, 3F). HRMS (ESI): calculated for  $\text{C}_{23}\text{H}_{26}\text{O}_2\text{N}_2\text{F}_3$  ( $[\text{M}+\text{H}]^+$ ): 419.1941; Found: 419.1946.

***tert*-butyl (4,4,4-trifluoro-3-(4-(pyrrolidine-1-carbonyl)phenyl)butyl)carbamate**

(4l)

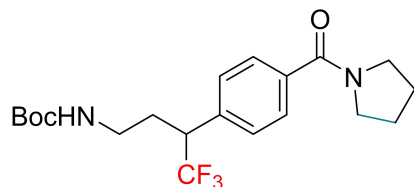

Obtained in 81% yield as a white solid (64.8 mg, eluent: PE/EA = 1:1), mp: 121 – 123 °C.  $^1\text{H}$  NMR (400 MHz,  $\text{CDCl}_3$ )  $\delta$  7.47 (d,  $J$  = 8.0 Hz, 2H), 7.29 (d,  $J$  = 8.0 Hz, 2H), 4.78 (s, 1H), 3.60 (t,  $J$  = 7.2 Hz, 2H), 3.39 (t,  $J$  = 6.6 Hz, 2H), 3.33 – 3.28 (m, 1H), 3.07 – 2.86 (m, 2H), 2.24 – 2.16 (m, 1H), 2.04 – 1.80 (m, 5H), 1.38 (s, 9H).  $^{13}\text{C}$  NMR (101 MHz,  $\text{CDCl}_3$ )  $\delta$  169.1, 155.9, 137.2, 135.9, 129.0, 127.6, 126.6 (q,  $J$  = 280.9 Hz), 79.3, 49.6, 47.5 (q,  $J$  = 27.8 Hz), 46.2, 37.9, 29.3, 28.3, 26.4, 24.4.  $^{19}\text{F}$  NMR (376 MHz,  $\text{CDCl}_3$ )  $\delta$  -69.52 (d,  $J$  = 9.4 Hz, 3F). HRMS (ESI): calculated for  $\text{C}_{20}\text{H}_{28}\text{O}_3\text{N}_2\text{F}_3$  ( $[\text{M}+\text{H}]^+$ ): 401.2047; Found: 401.2049.

***tert*-butyl(5,5,5-trifluoro-2-methyl-4-(4-(pyrrolidine-1-carbonyl)phenyl)pentan-2-yl)carbamate (4m)**

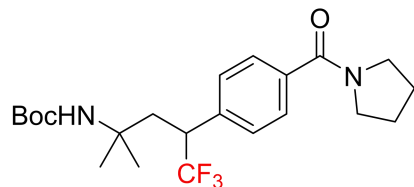

Obtained in 79% yield as a white solid (67.7 mg, eluent: PE/EA = 3:1), mp: 73 – 75 °C.  $^1\text{H}$  NMR (400 MHz,  $\text{CDCl}_3$ )  $\delta$  7.46 (d,  $J$  = 8.0 Hz, 2H), 7.32 (d,  $J$  = 7.6 Hz, 2H), 4.30 (s, 1H), 3.59 (t,  $J$  = 7.0 Hz, 2H), 3.41 – 3.31 (m, 3H), 2.47 (d,  $J$  = 14.4 Hz, 1H), 1.94 – 1.88 (m, 2H), 1.85 – 1.78 (m, 2H), 1.32 (s, 9H), 1.20 (s, 3H), 0.99 (s, 3H).  $^{13}\text{C}$  NMR (101 MHz,  $\text{CDCl}_3$ )  $\delta$  169.1, 154.0, 138.0, 136.9, 129.3, 127.6, 126.9 (q,  $J$  = 281.5 Hz), 79.0, 52.1, 49.6, 46.5 (q,  $J$  = 26.8 Hz), 46.2, 38.0, 28.3, 28.0 (d,  $J$  = 20.7 Hz), 26.4, 24.4.  $^{19}\text{F}$  NMR (376 MHz,  $\text{CDCl}_3$ )  $\delta$  -69.87 (s, 3F). HRMS (ESI): calculated for  $\text{C}_{22}\text{H}_{31}\text{O}_3\text{N}_2\text{F}_3\text{Na}$  ( $[\text{M}+\text{Na}]^+$ ): 451.2179; Found: 451.2183.

## 8. Reference

- [1] Y. Li, B. Zhao, K. Dai, D.-H. Tu, B. Wang, Y.-Y. Wang, Zh.-T. Liu, Z.-W. Liu, J. Lu. Palladium-catalyzed Suzuki–Miyaura reaction of fluorinated vinyl chloride: a new approach for synthesis  $\alpha$  and  $\alpha,\beta$ -trifluoromethylstyrenes. *Tetrahedron*, **2016**, 72, 5684-5690.
- [2] B. Jiang, Q.-F. Wang, C.-G. Yang, M. Xu.  $\alpha$ -(Trifluoromethyl) ethenyl boronic acid as a useful trifluoromethyl containing building block. Preparation and palladium-catalysed coupling with aryl halides. *Tetrahedron Lett.* **2001**, 42, 4083-4085.
- [3] Y.-G. Lou, A.-J. Wang, L. Zhao, L.-F. He, X.-F. Li, C.-Y. He, X. Zhang. Palladium-catalyzed cross-coupling of unactivated alkylzinc reagents with 2-bromo-3,3,3-trifluoropropene and its application in the synthesis of fluorinated amino acids. *Chem. Commun.*, **2019**, 55, 3705-3708.
- [4] a) K. Okada, K. Okamoto, M. Oda. A new and practical method of decarboxylation: photosensitized decarboxylation of N-acyloxyphthalimides via electron-transfer mechanism. *J. Am. Chem. Soc.* **1988**, 110, 8736-8738. b) K. Okada, K. Okamoto, N. Morita, K. Okubo, M. Oda. Photosensitized decarboxylative Michael addition through N-(acyloxy)phthalimides via an electron-transfer mechanism. *J. Am. Chem. Soc.* **1991**, 113, 9401-9402. c) T. Qin, J. Cornella, C. Li, L. R. Malins, J. T. Edwards, S. Kawamura, B. D. Maxwell, M. D. Eastgate, P. S. Baran. A general alkyl-alkyl cross-coupling enabled by redox-active esters and alkylzinc reagents. *Science*. **2016**, 352, 801-805.

## 9. Copies of $^1\text{H}$ NMR, $^{19}\text{F}$ NMR and $^{13}\text{C}$ NMR charts of the Products



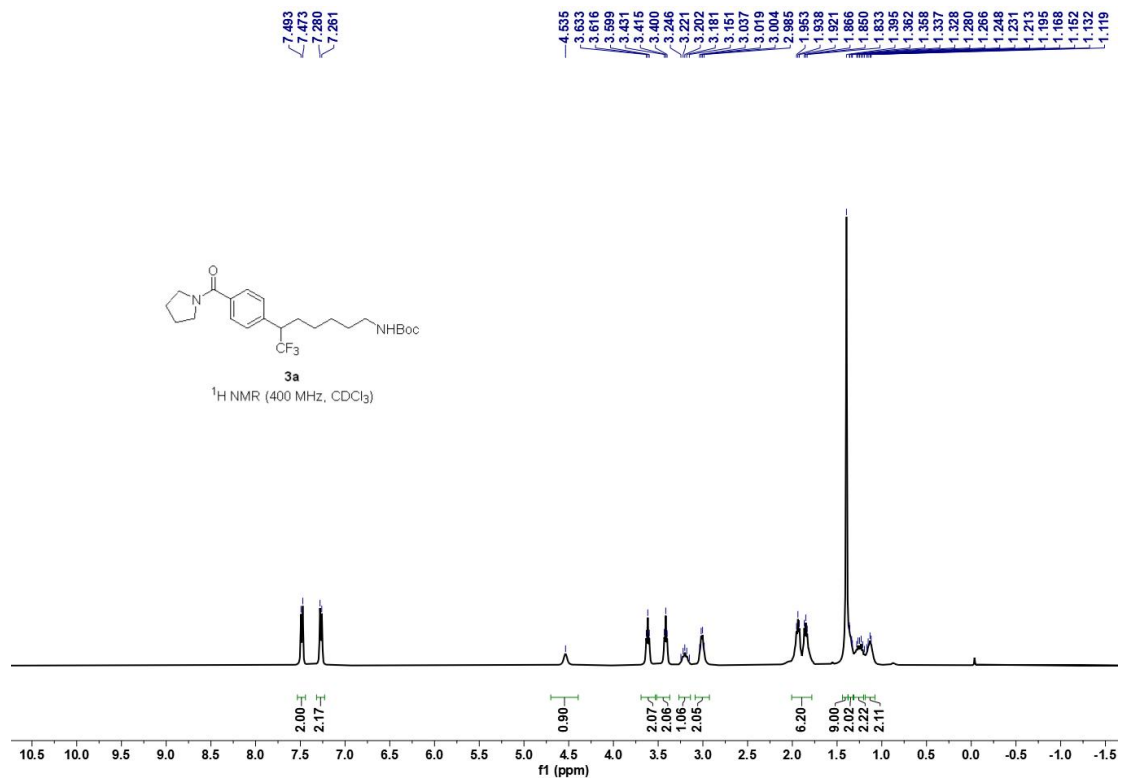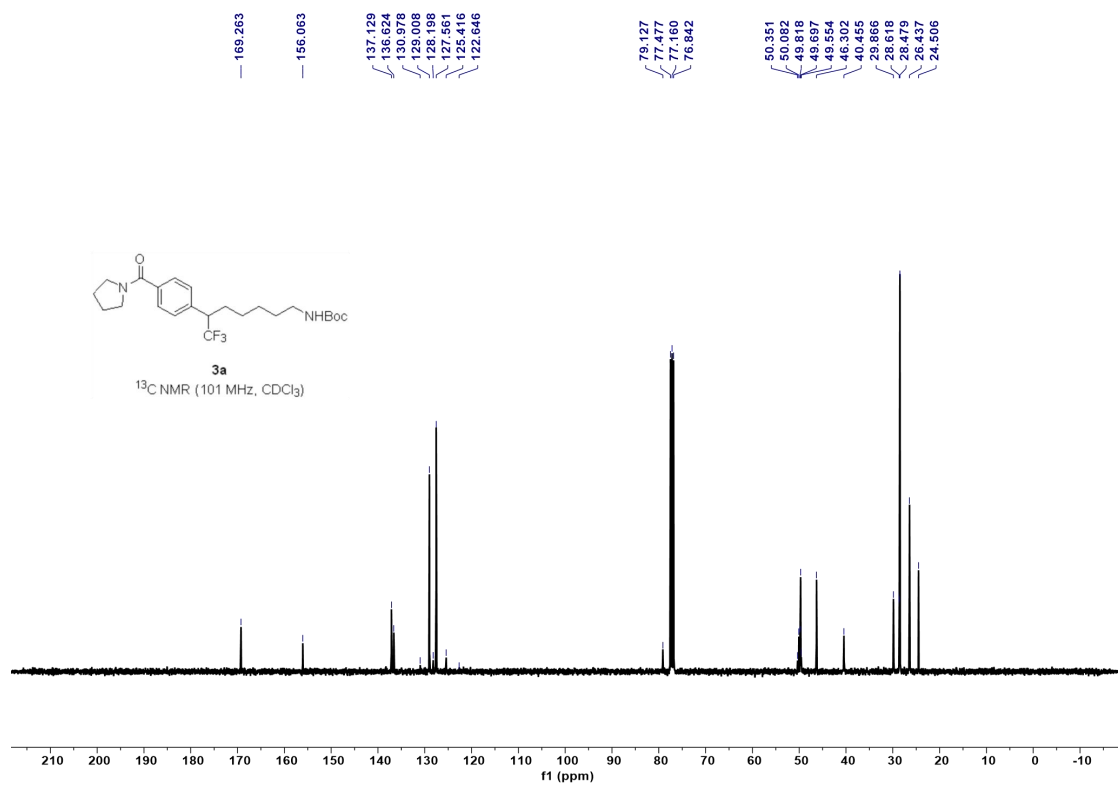

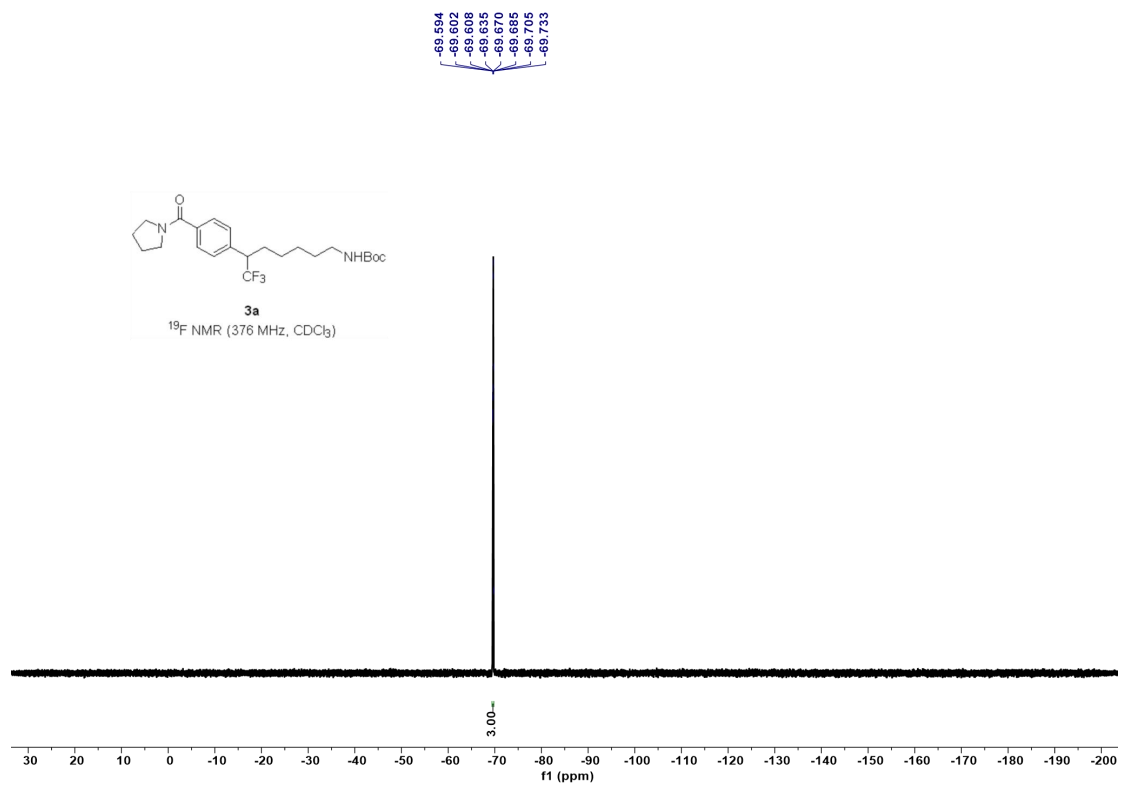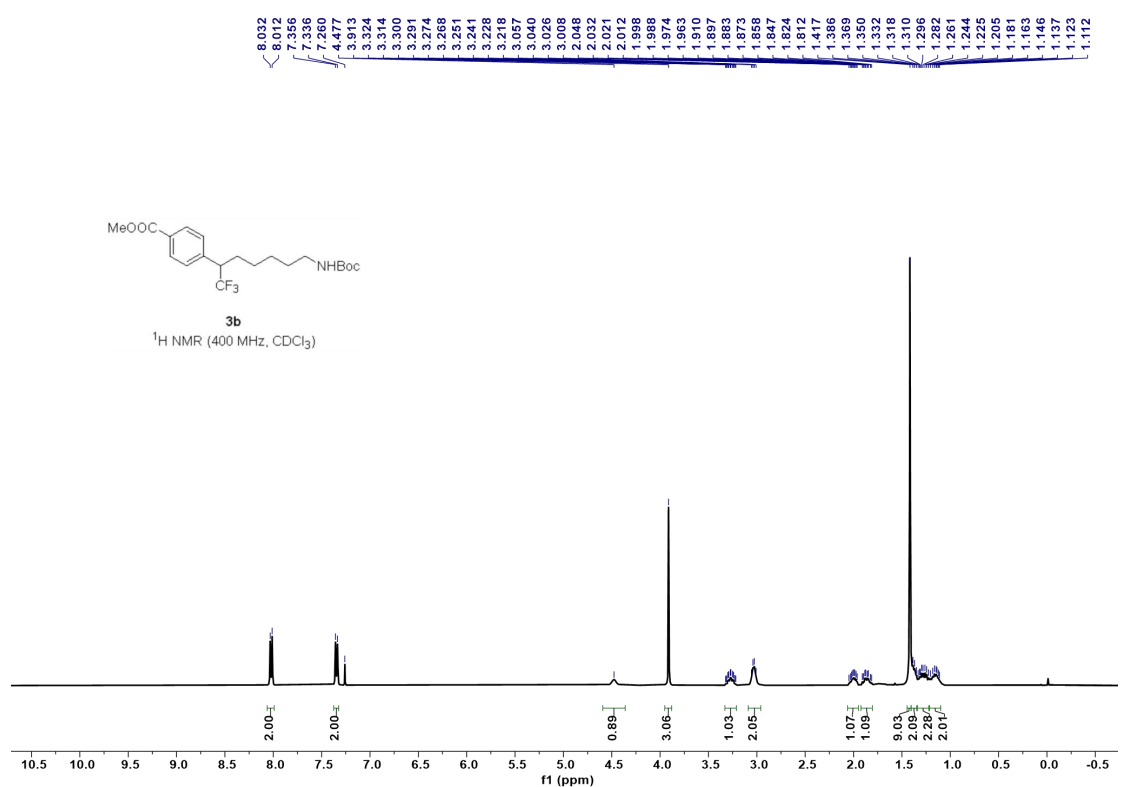

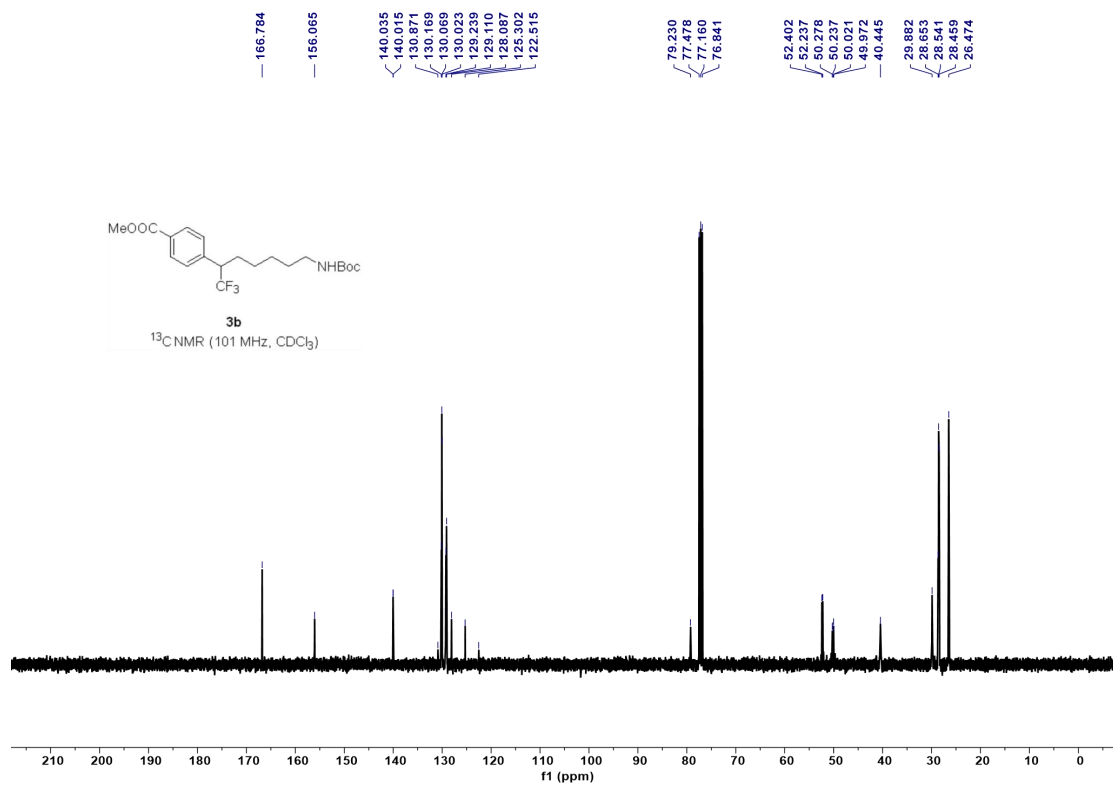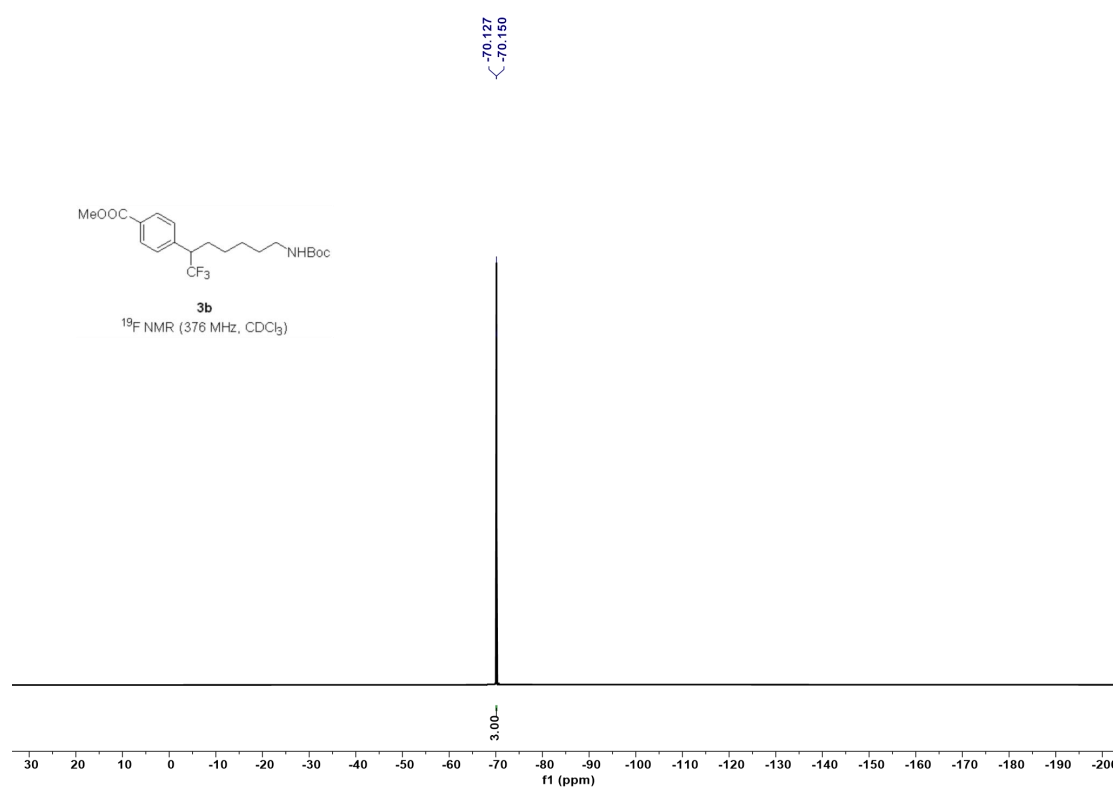

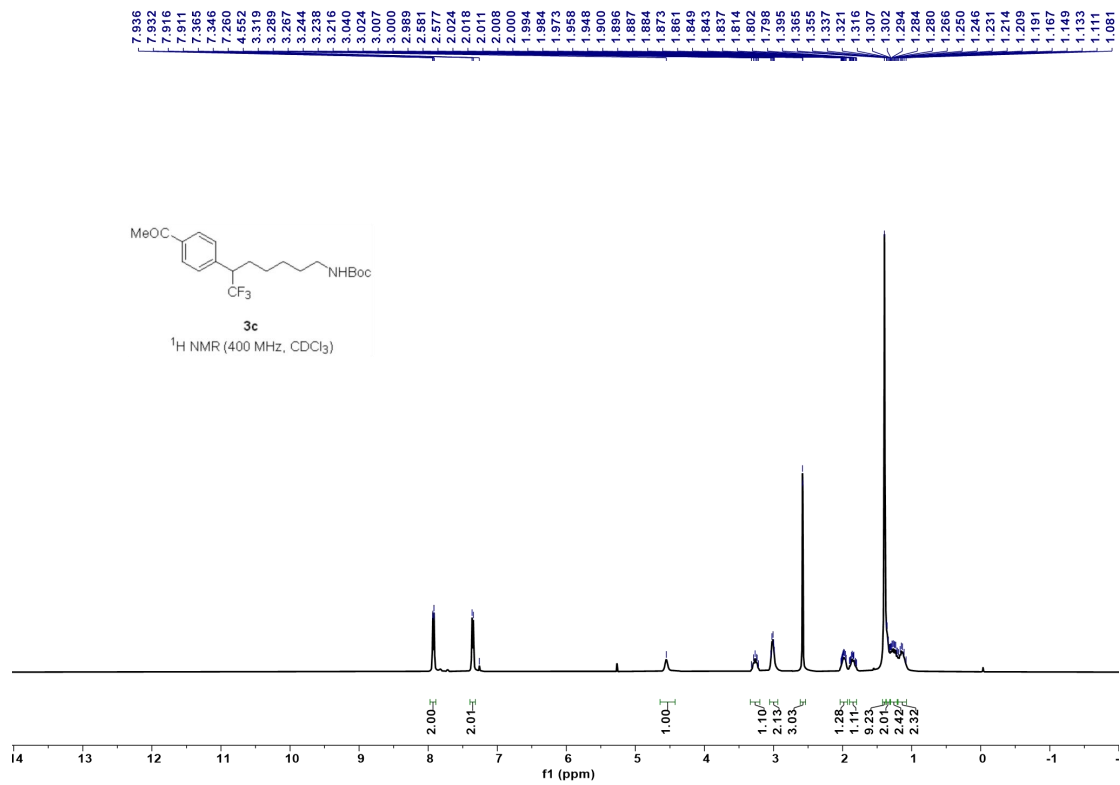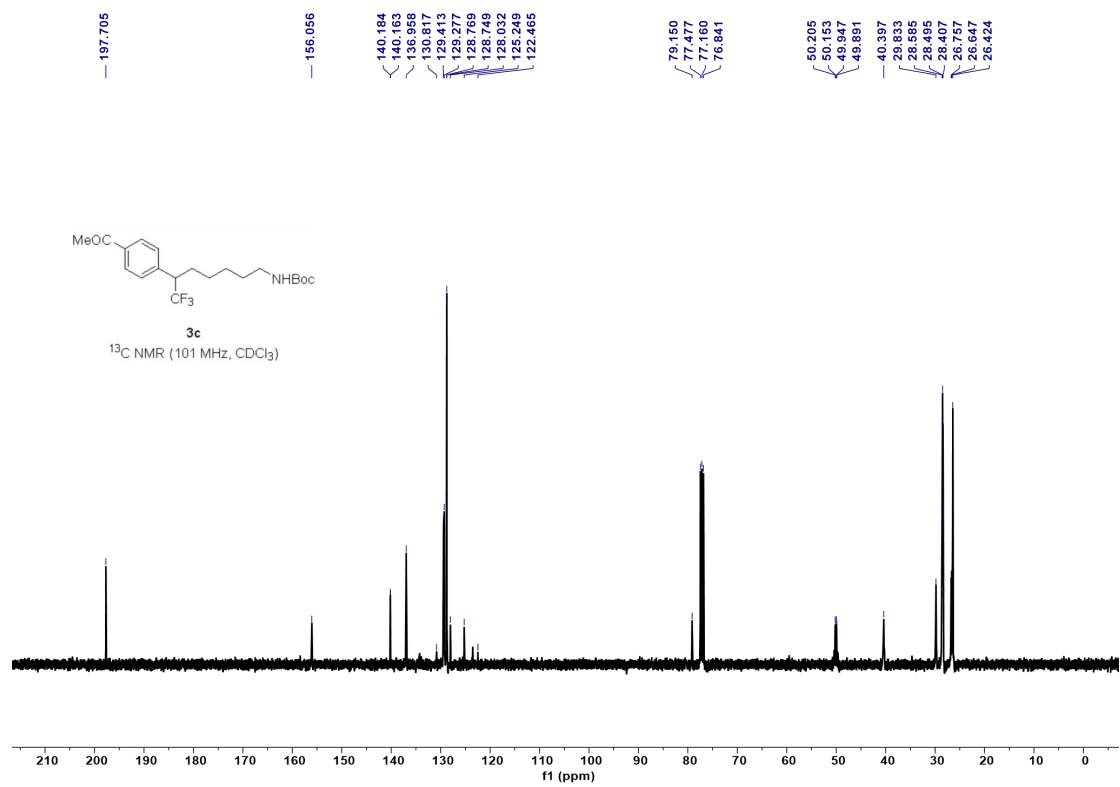

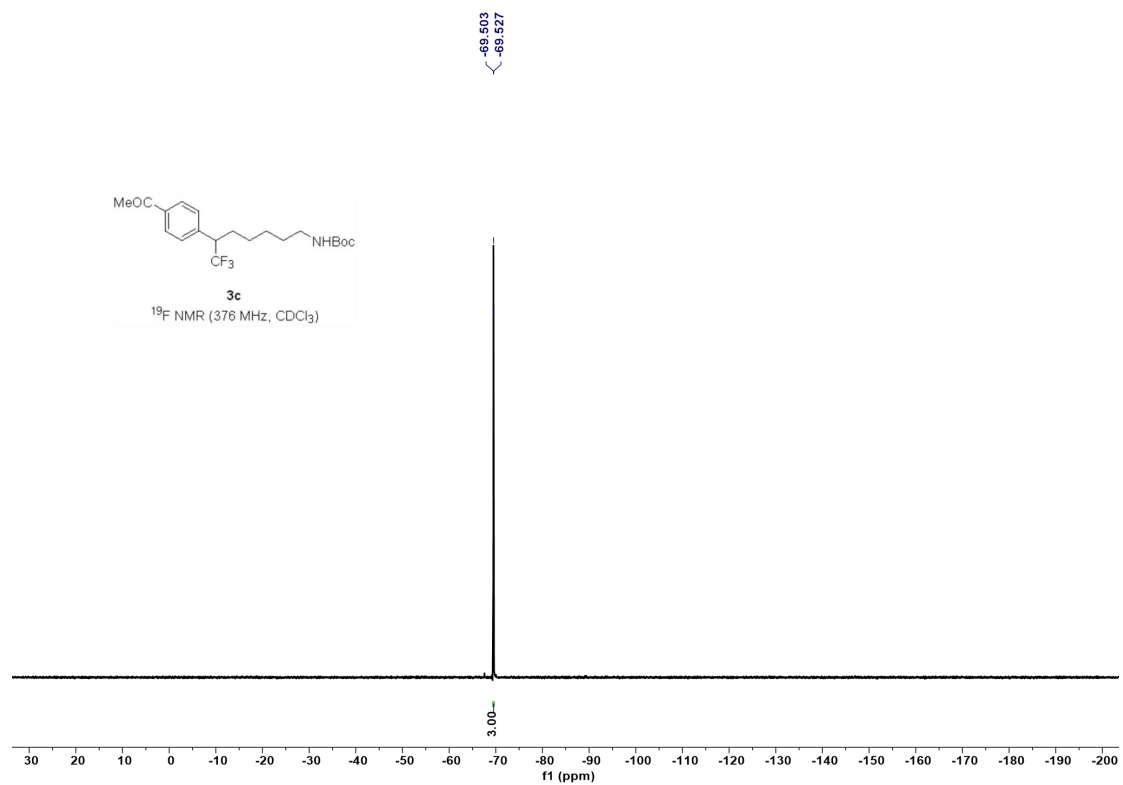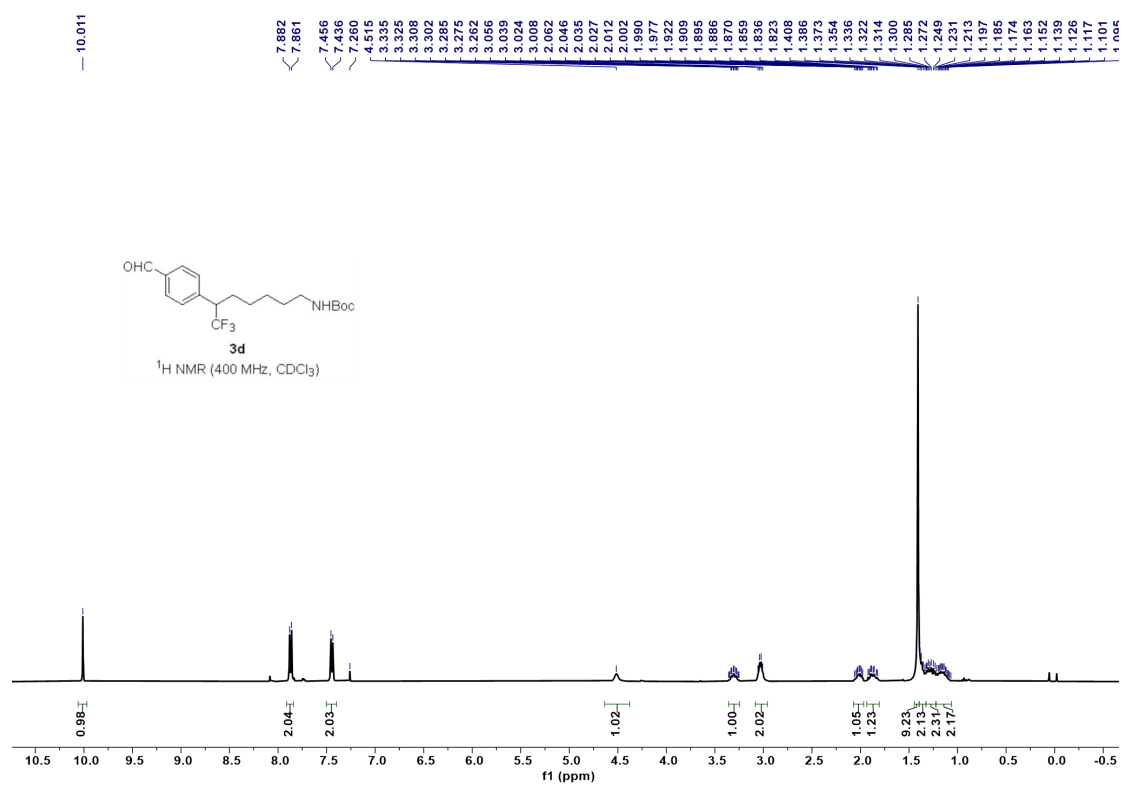

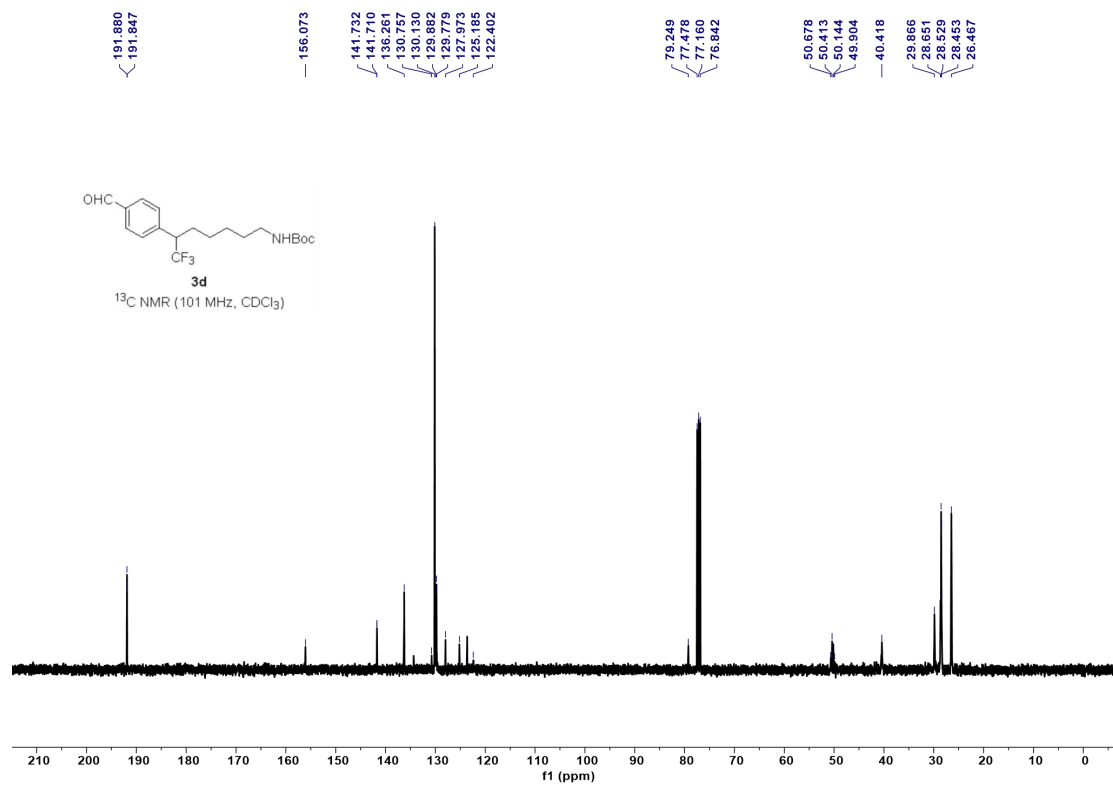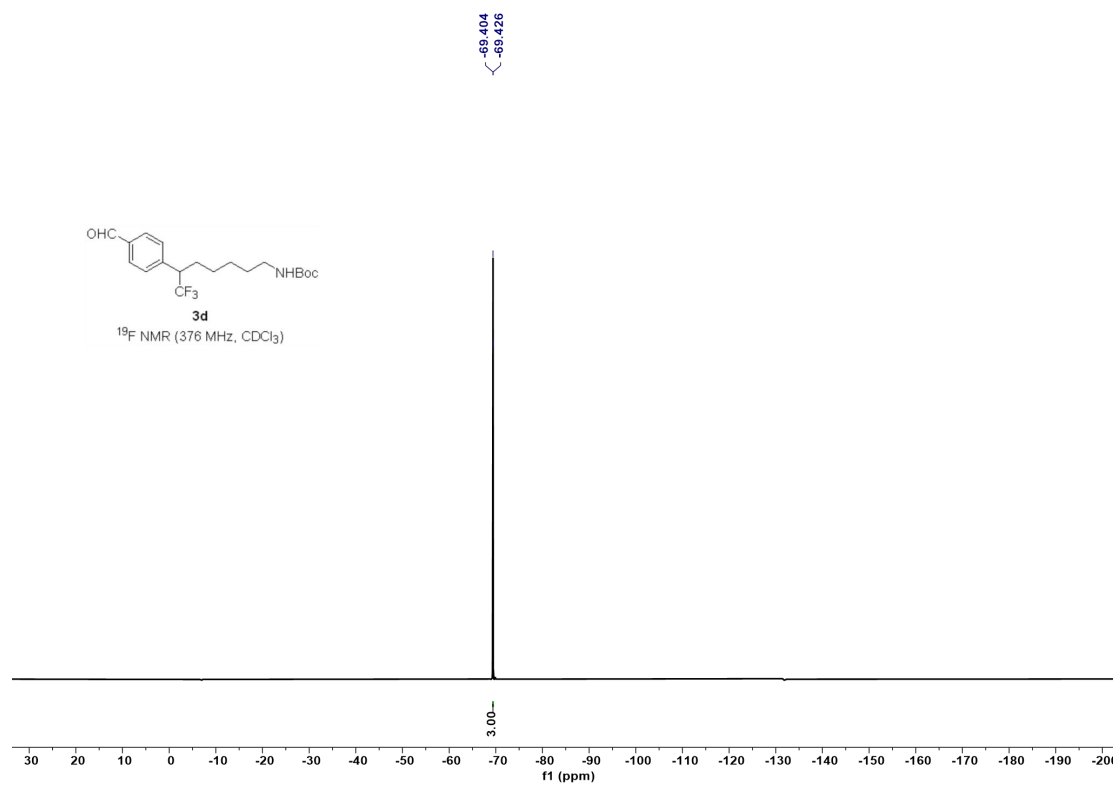

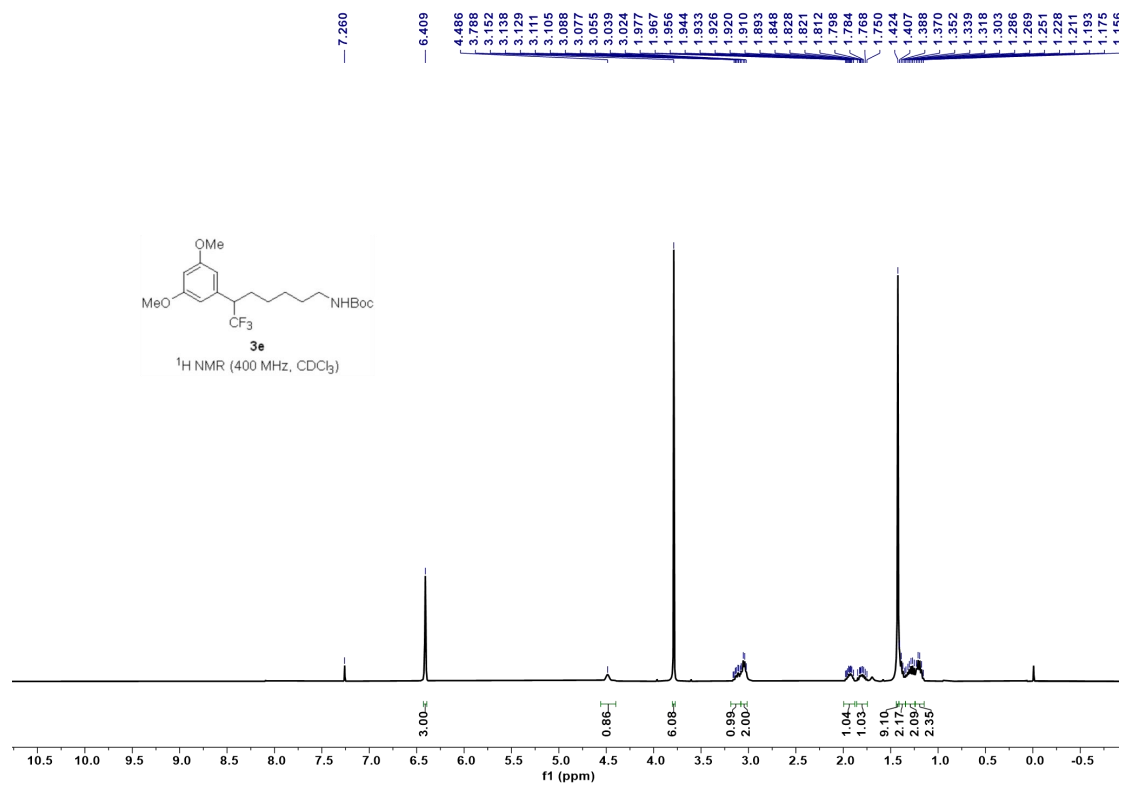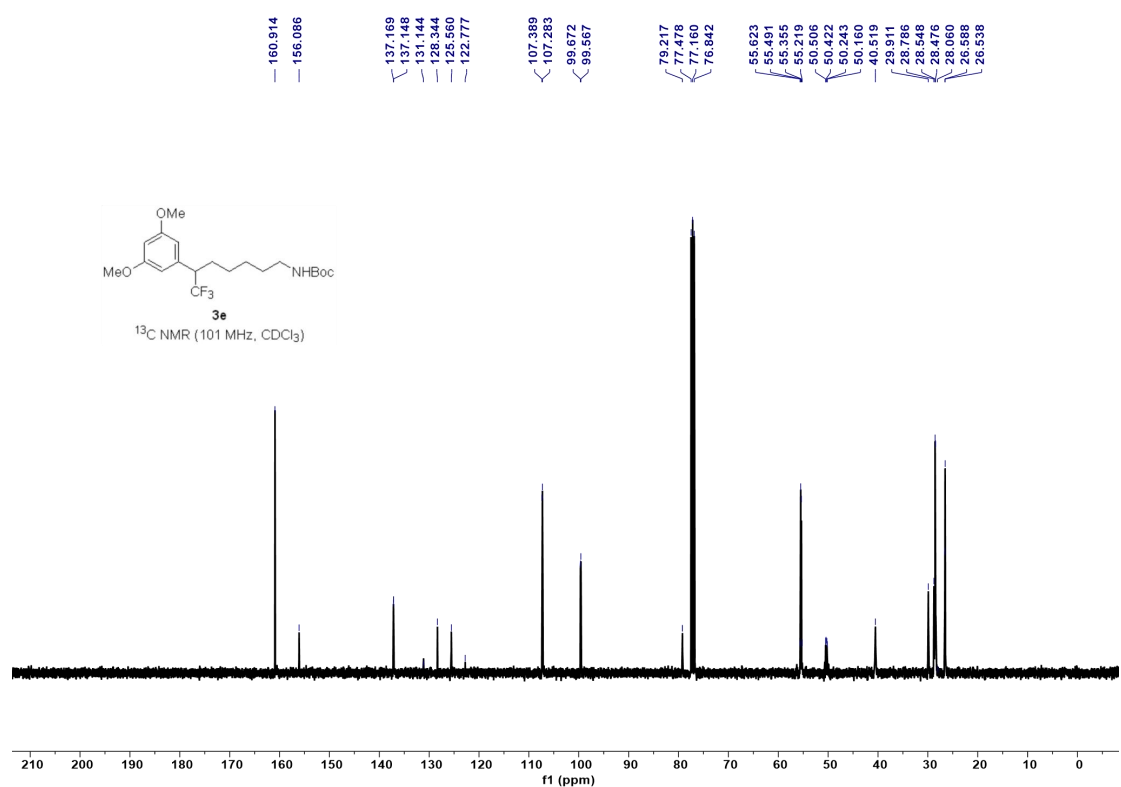

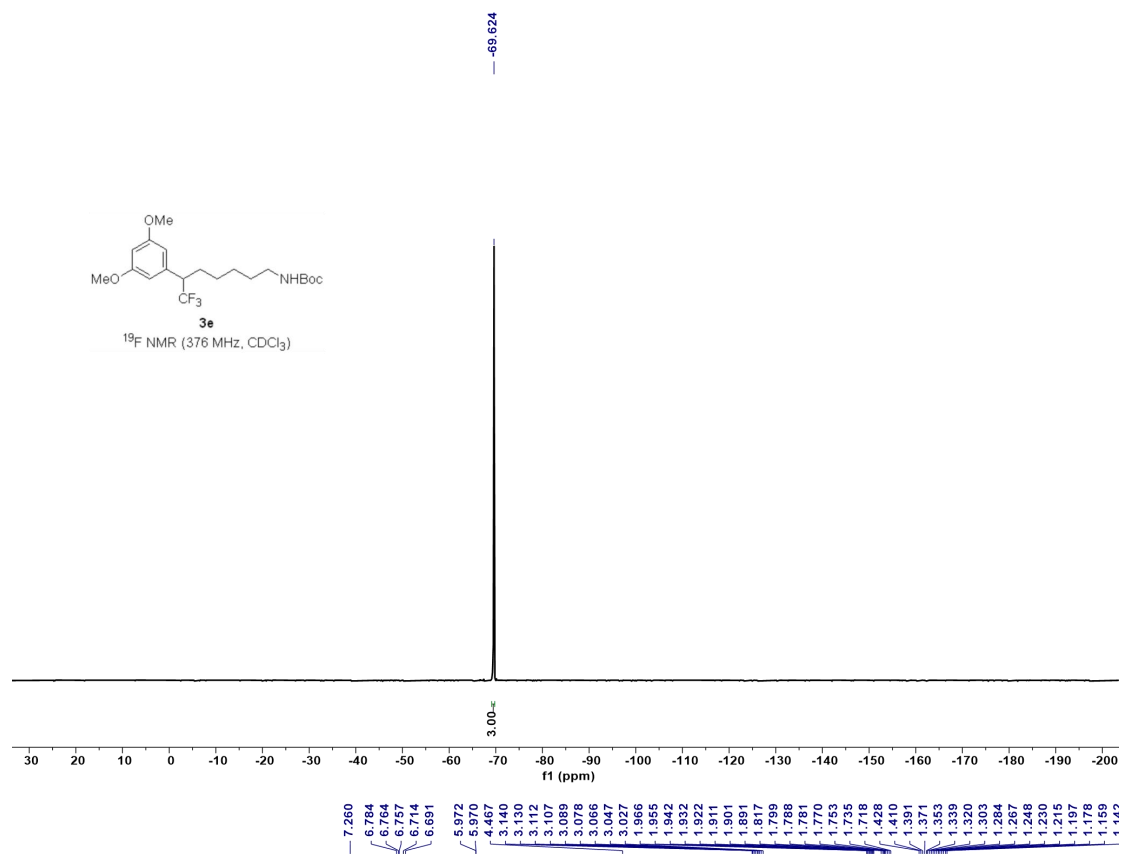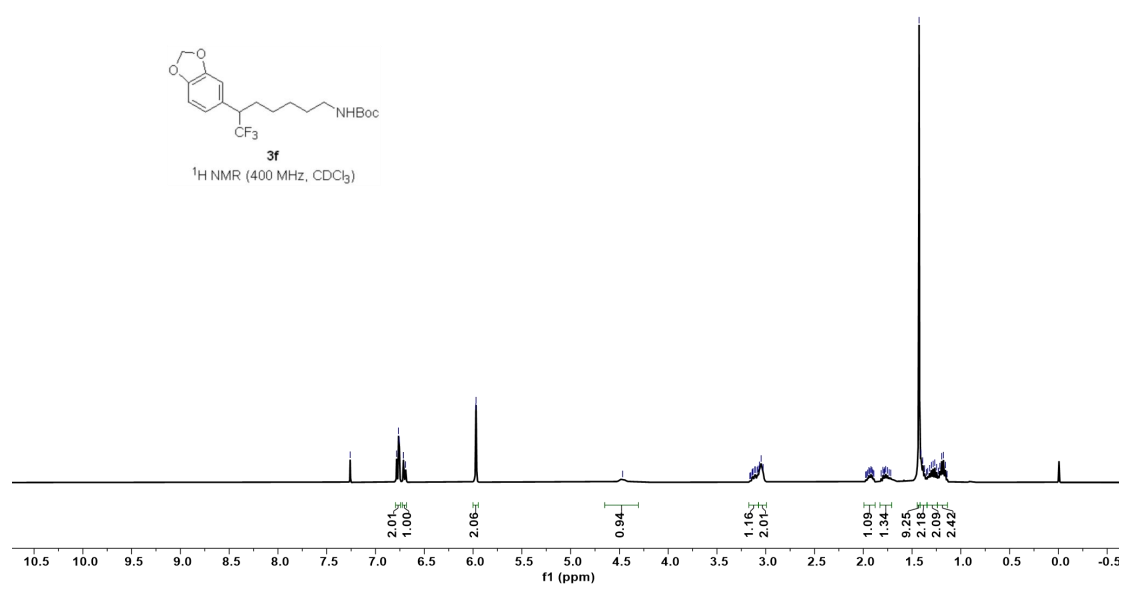



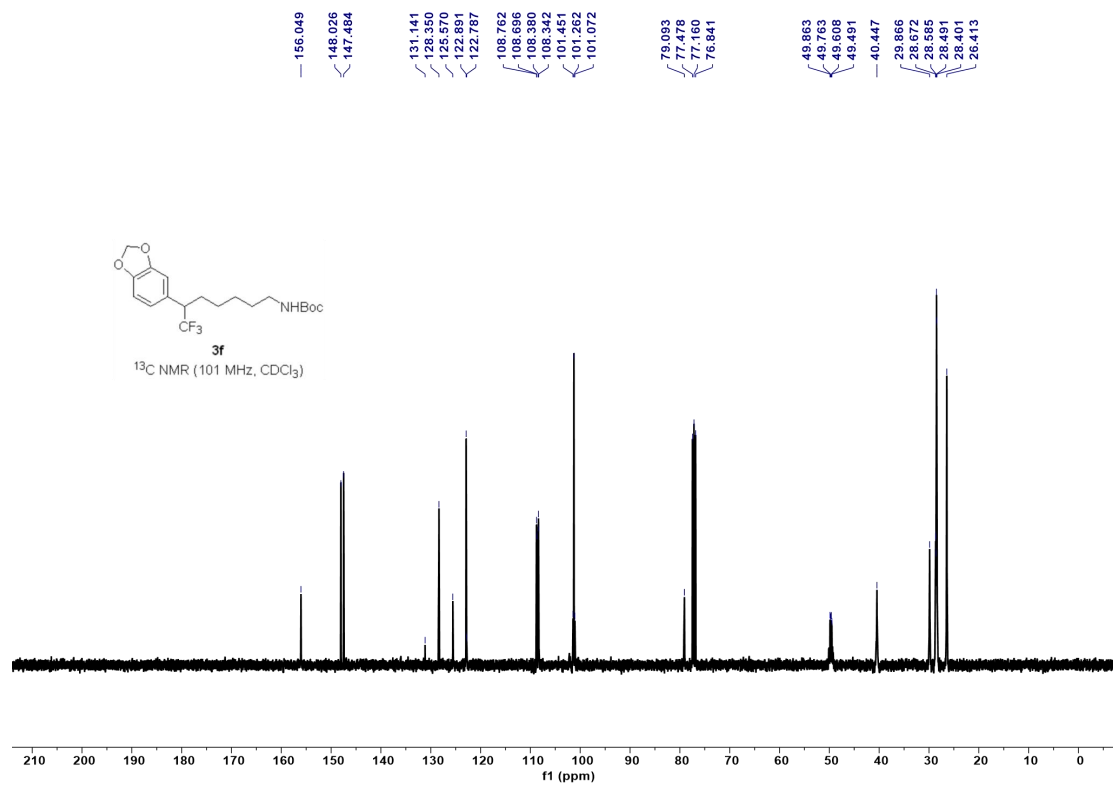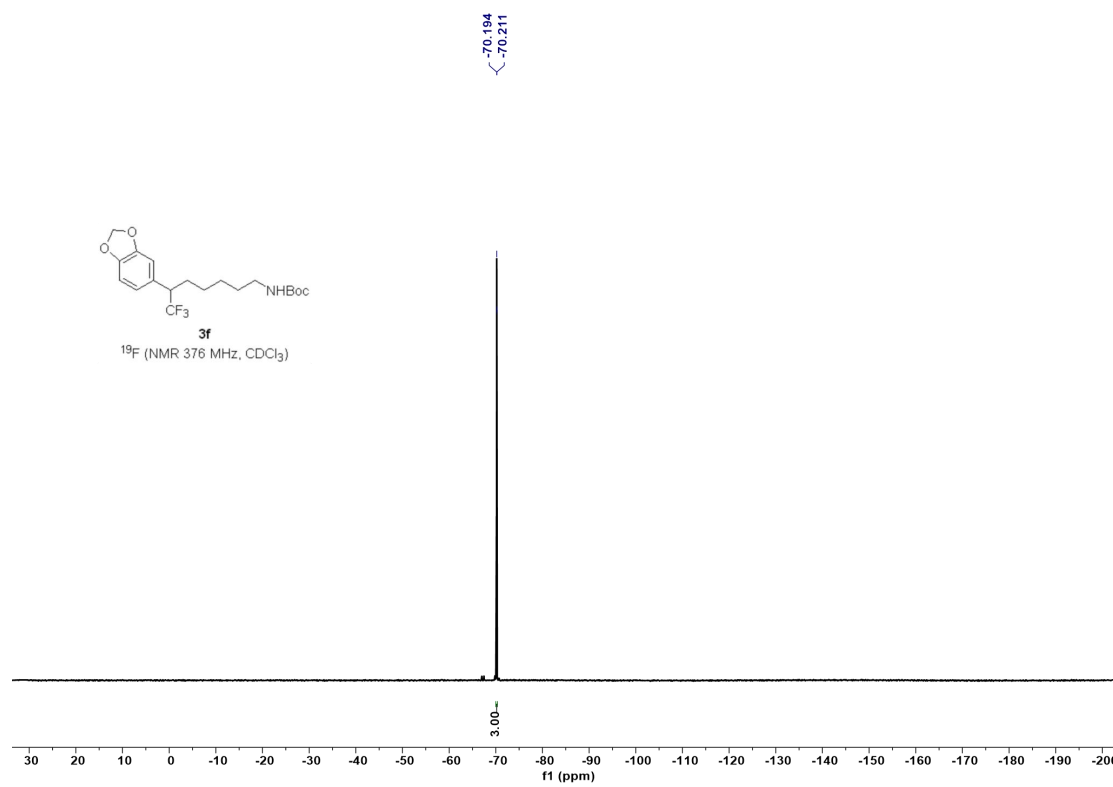

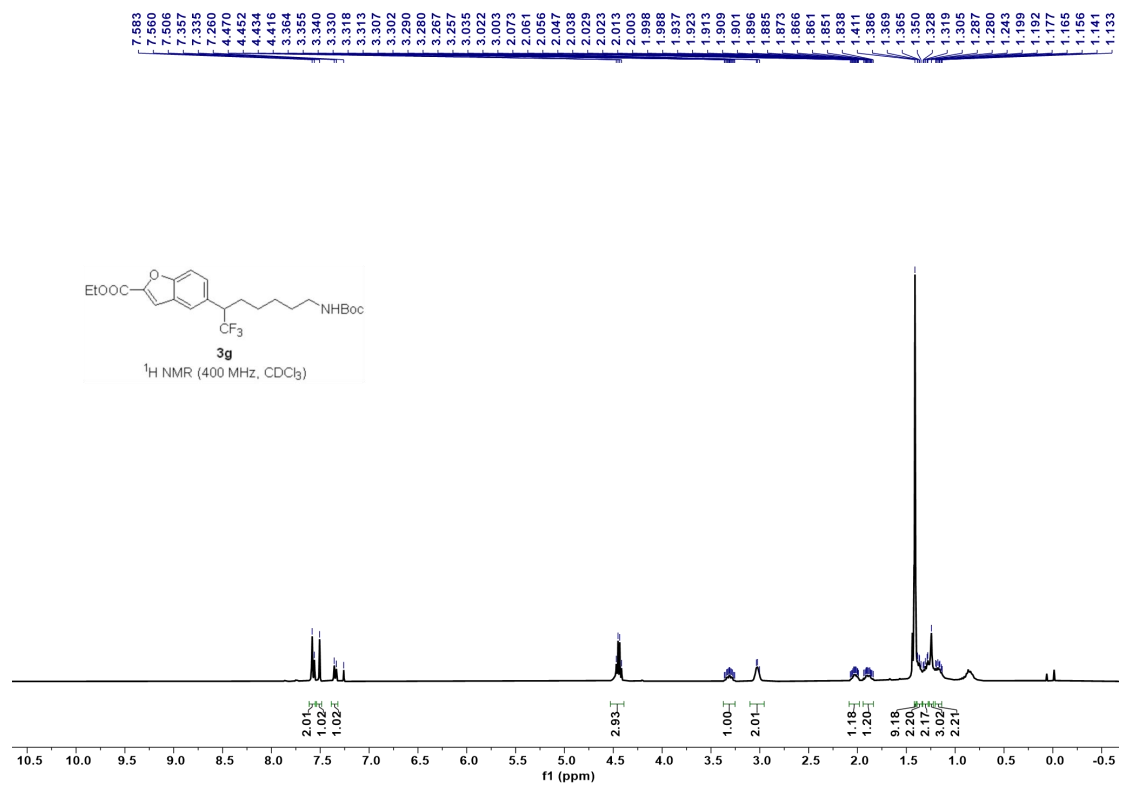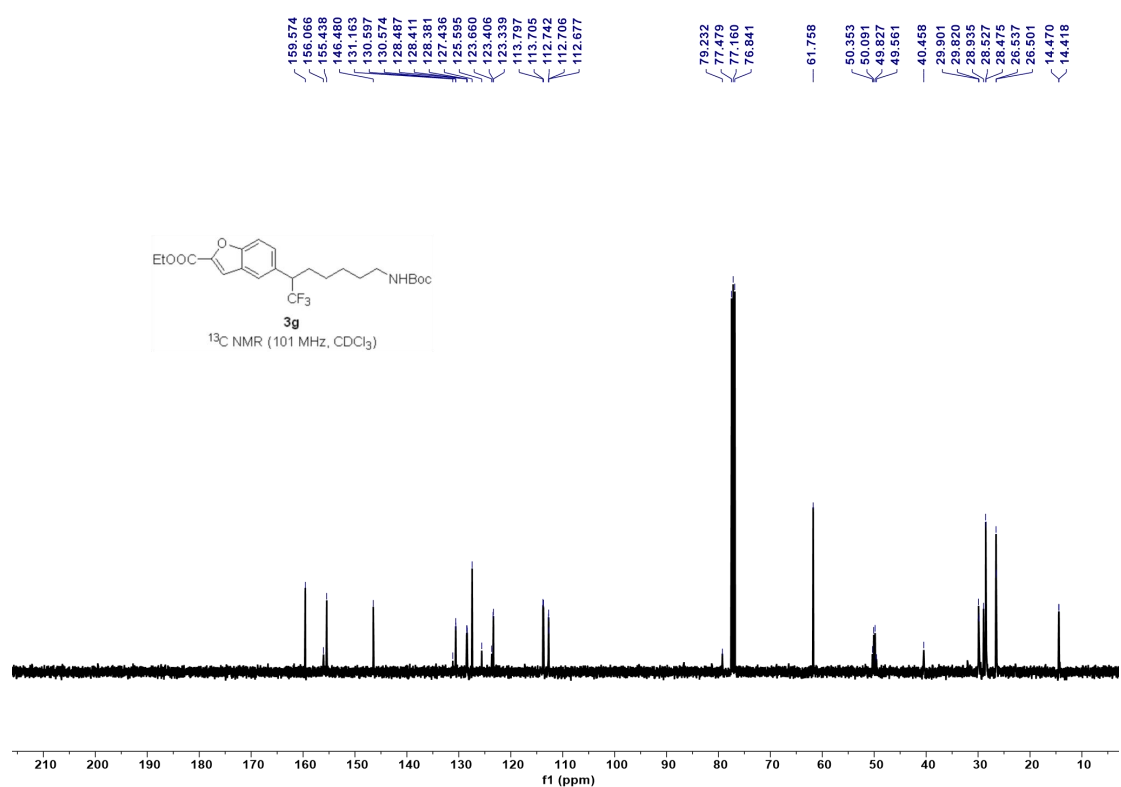

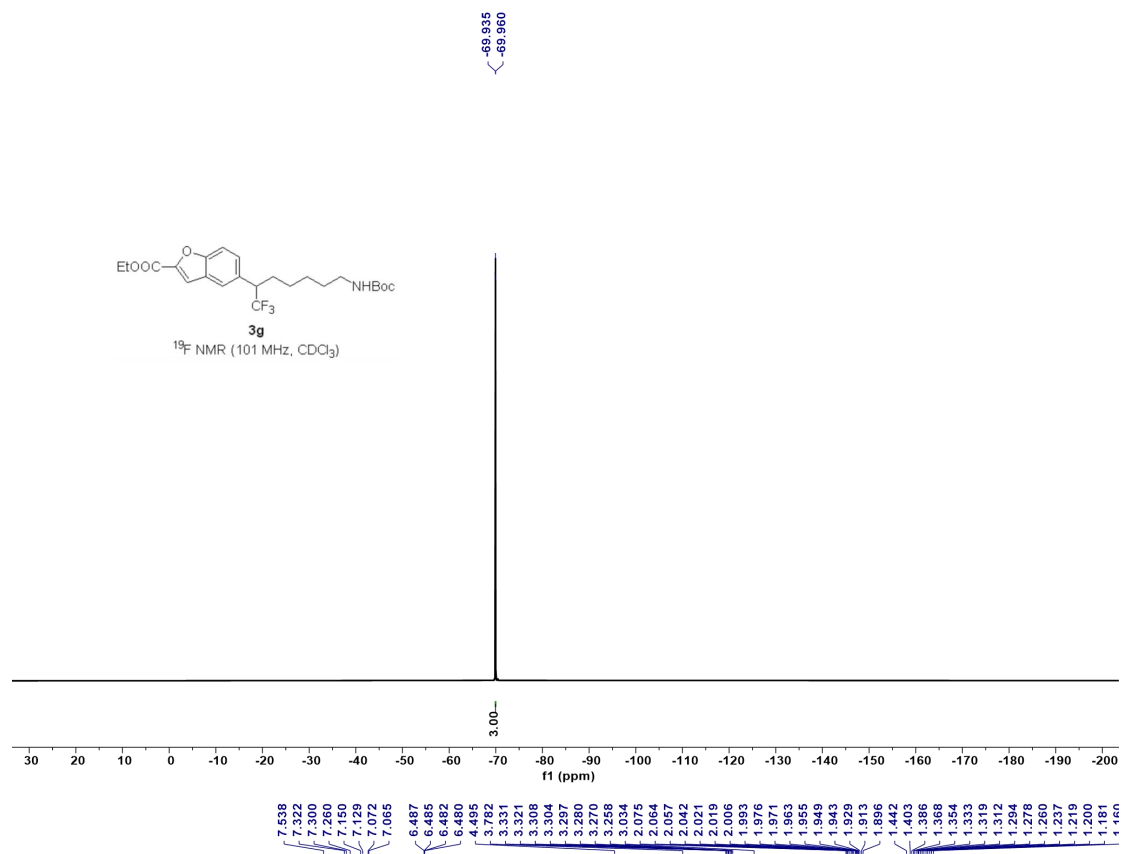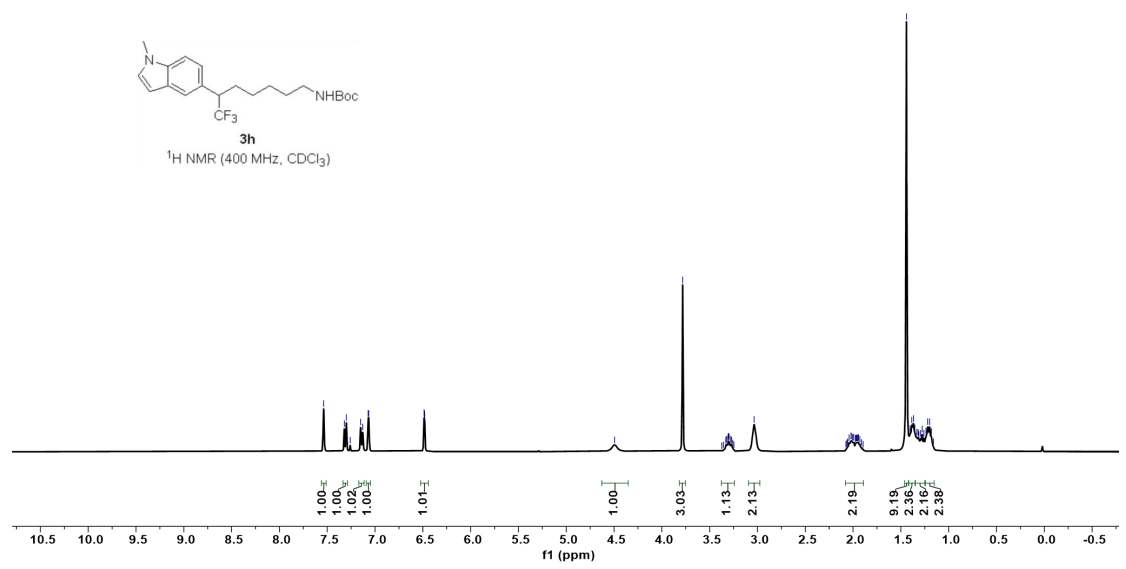

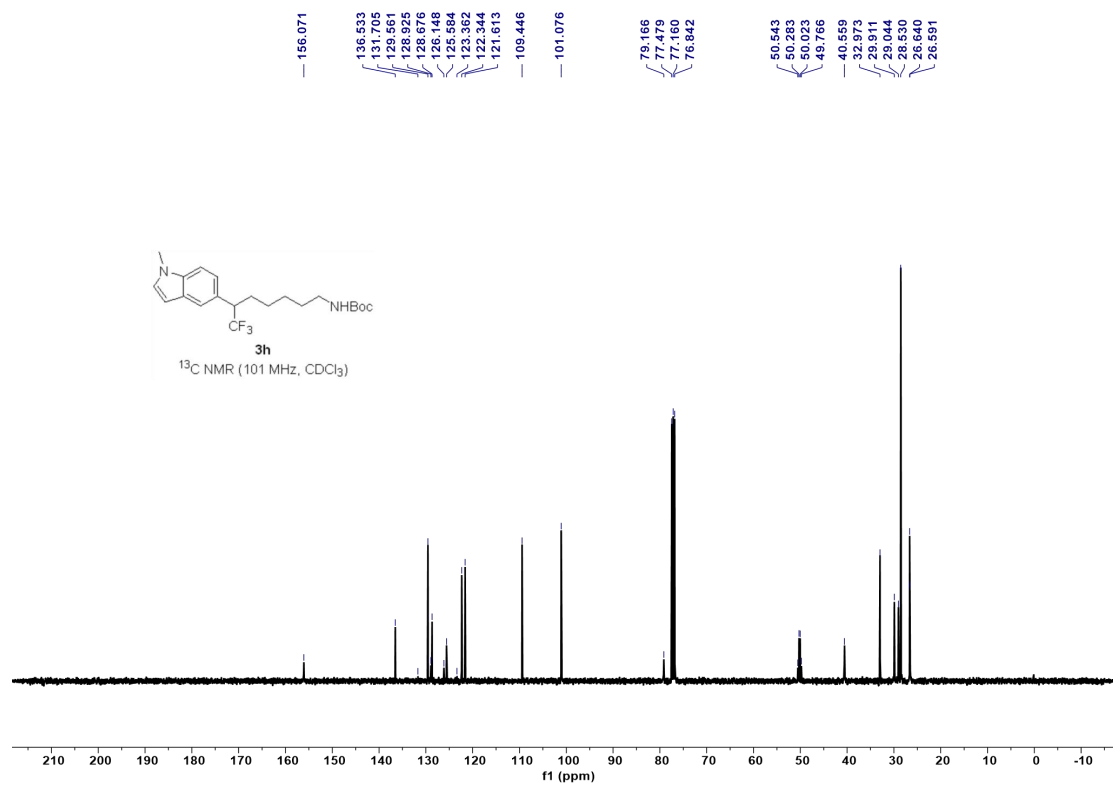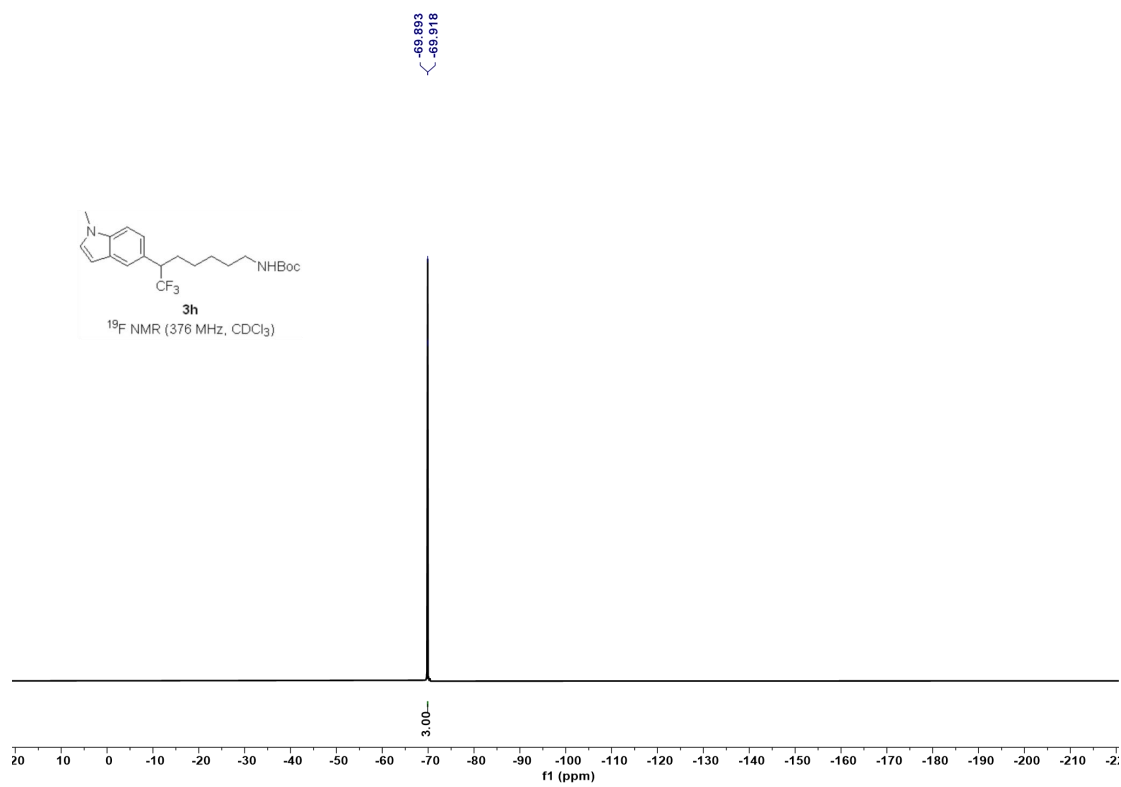

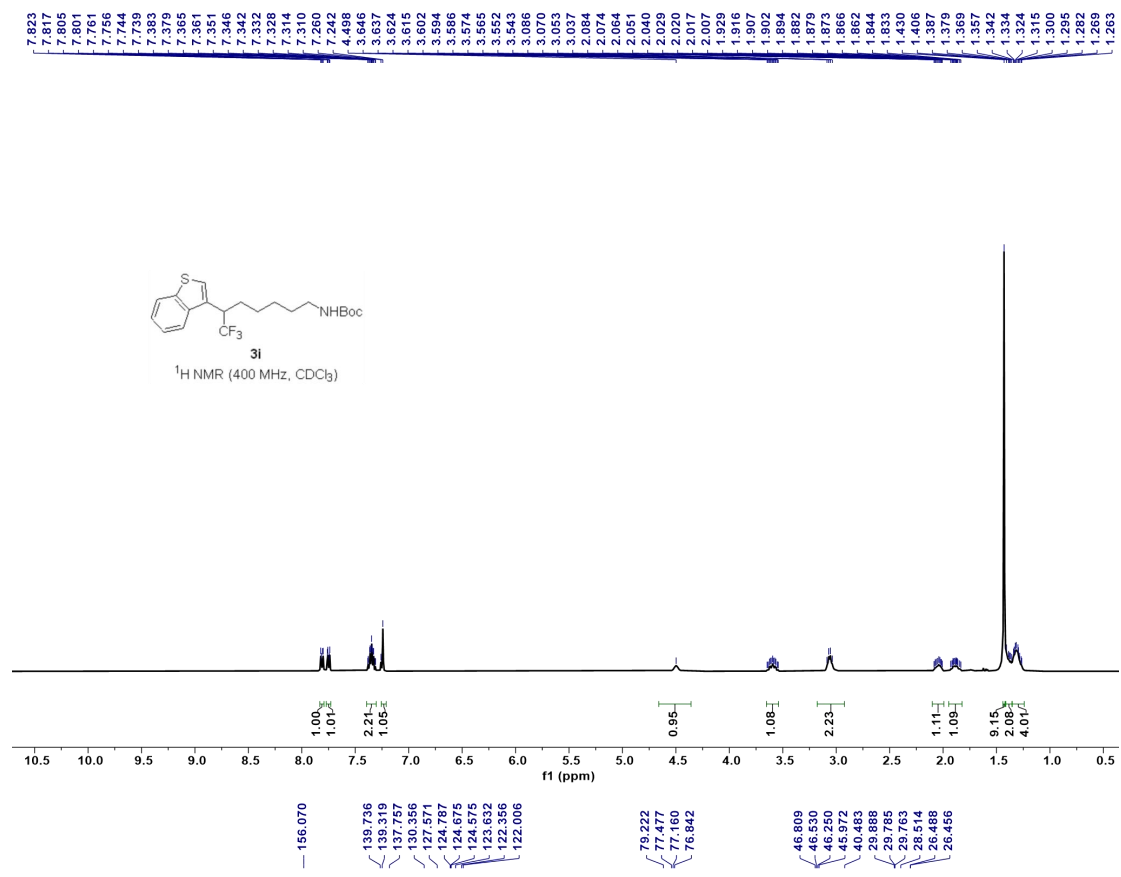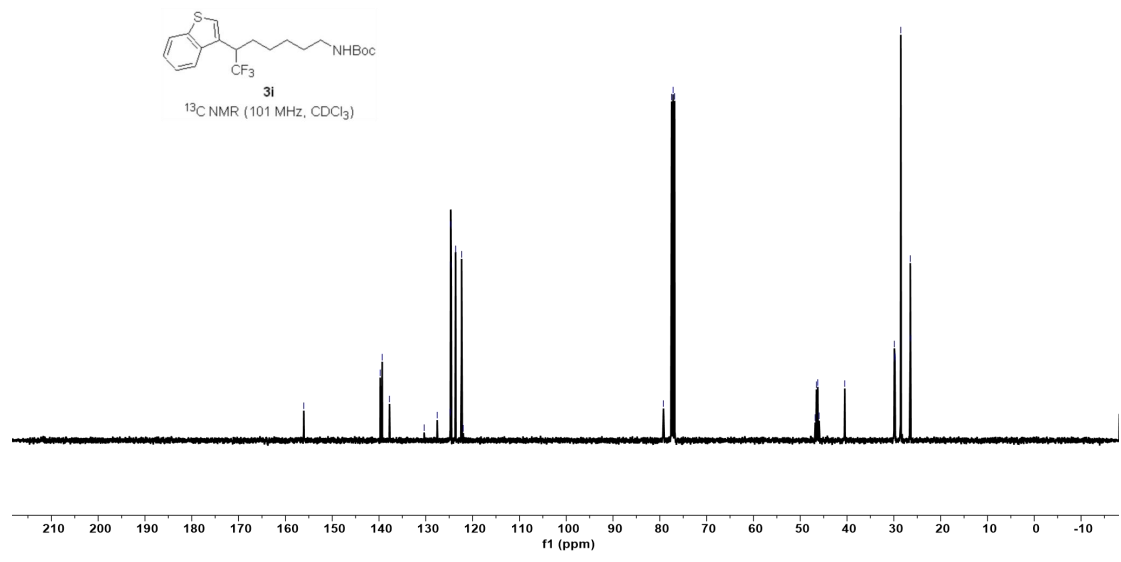

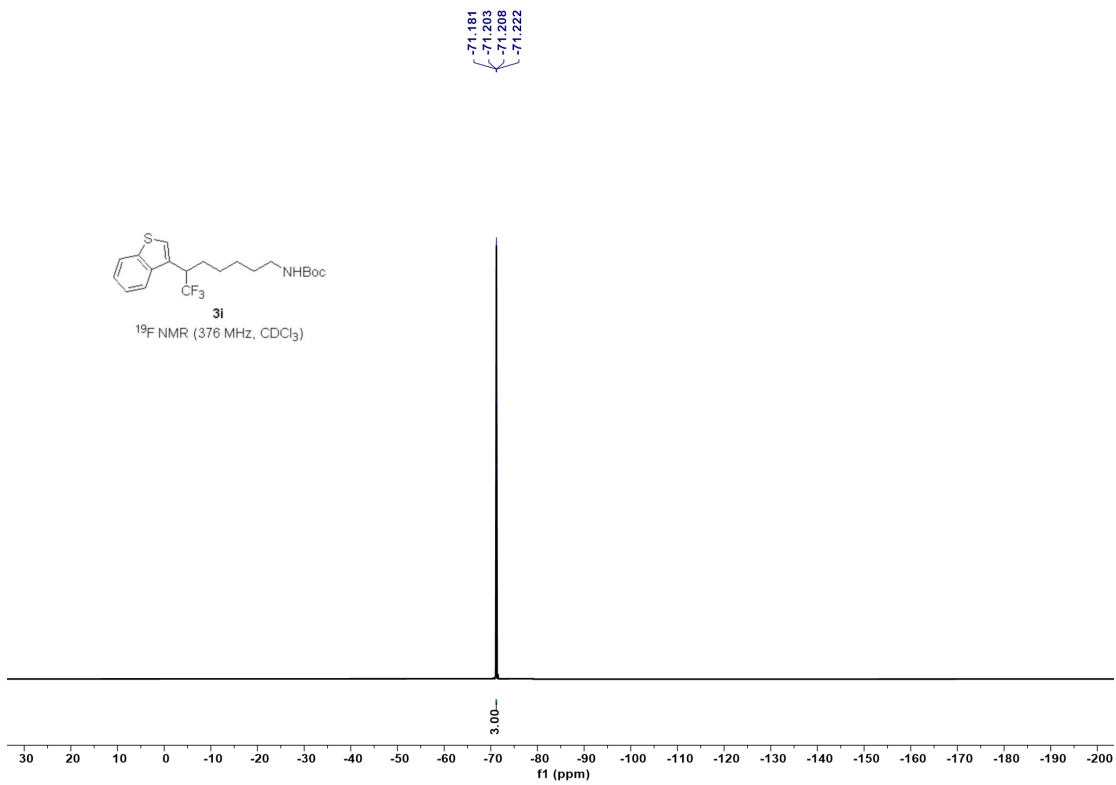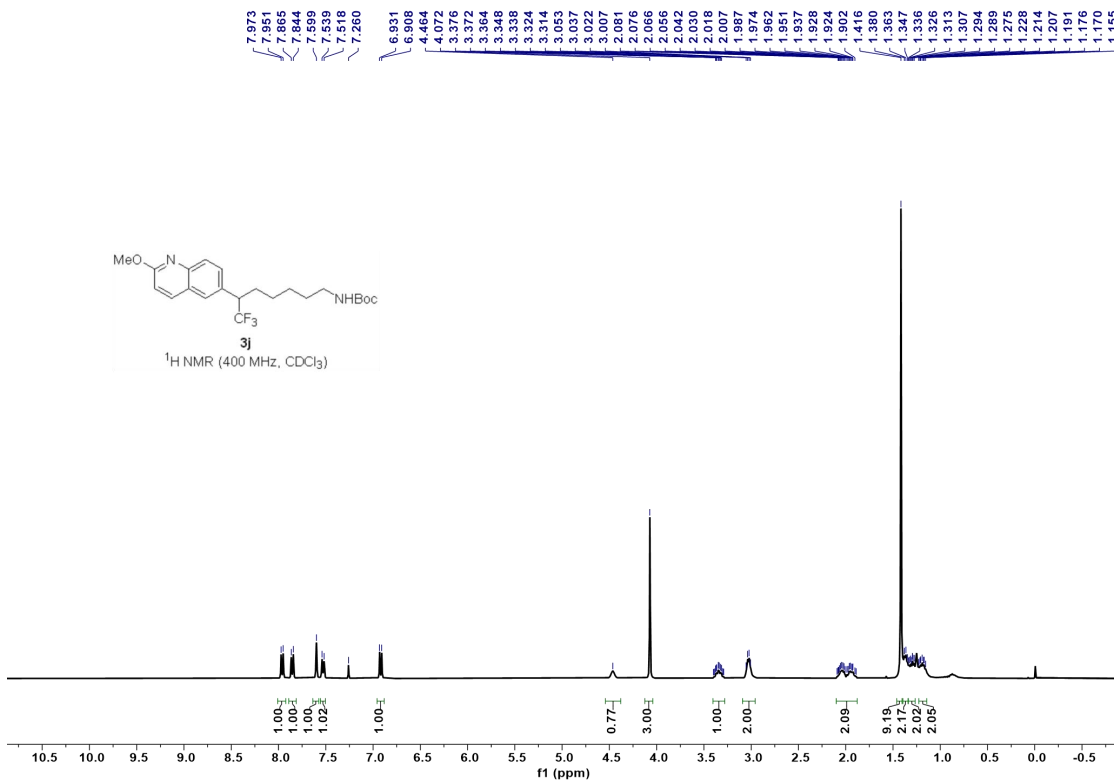

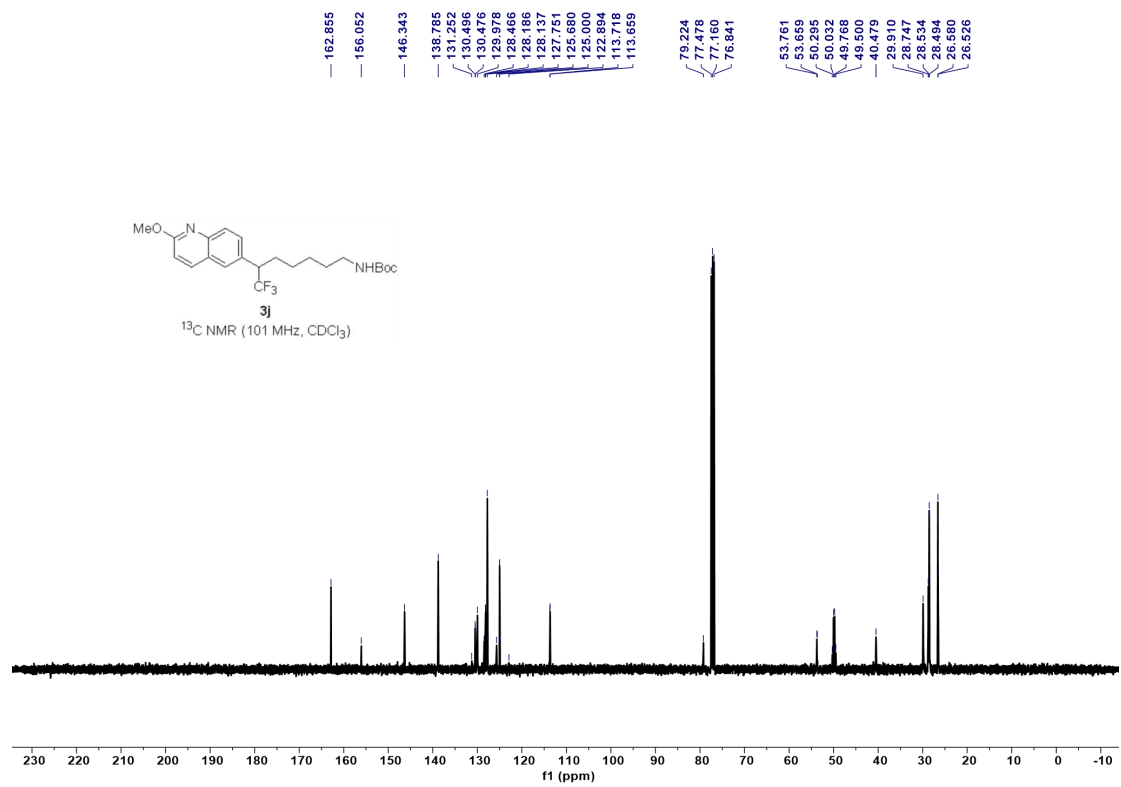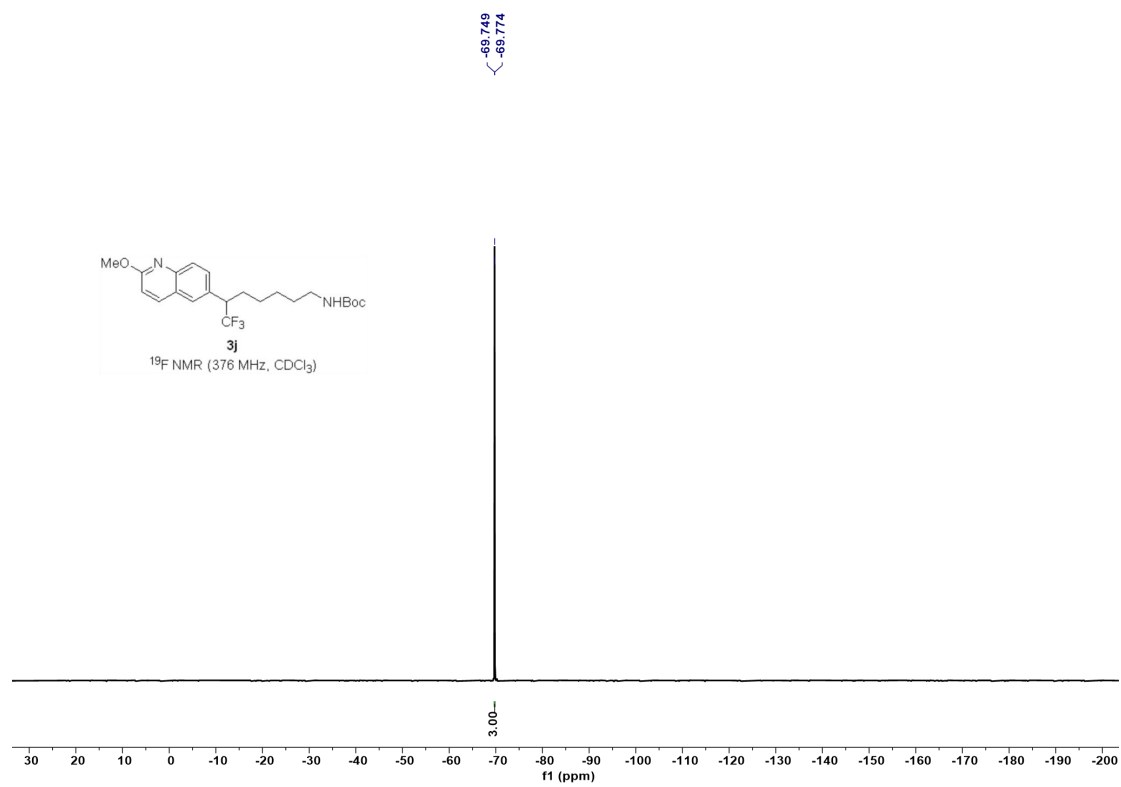

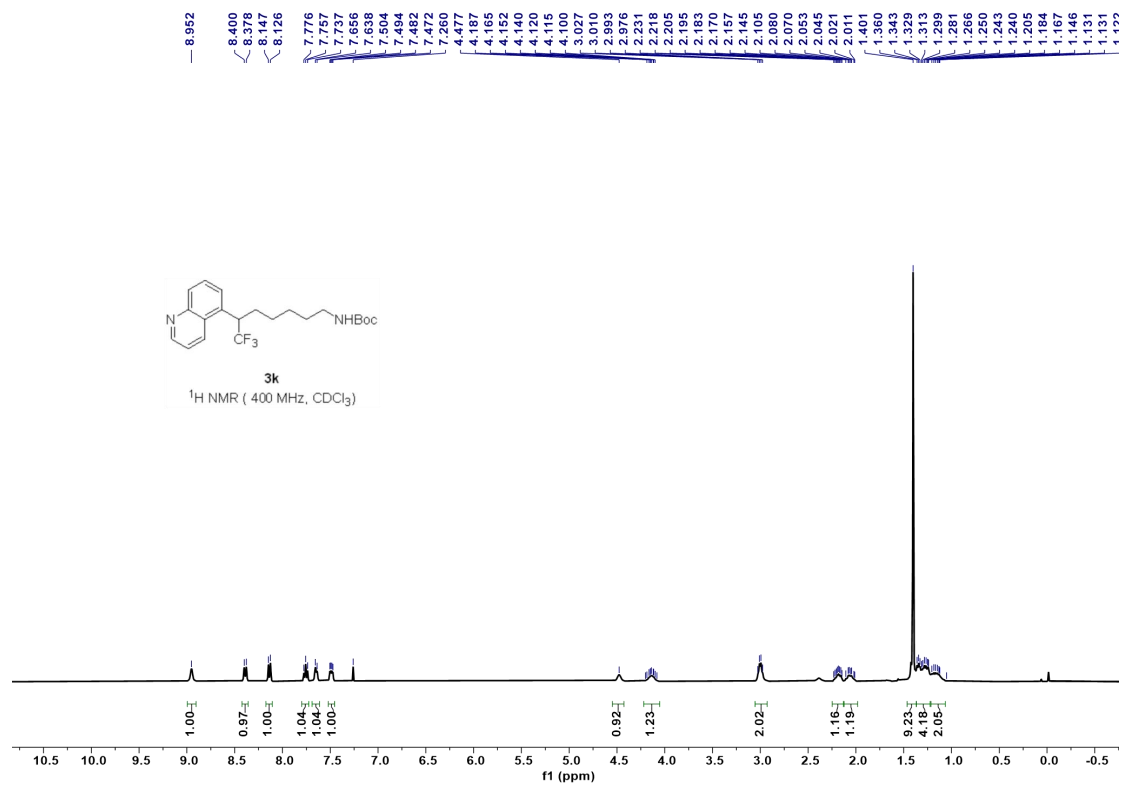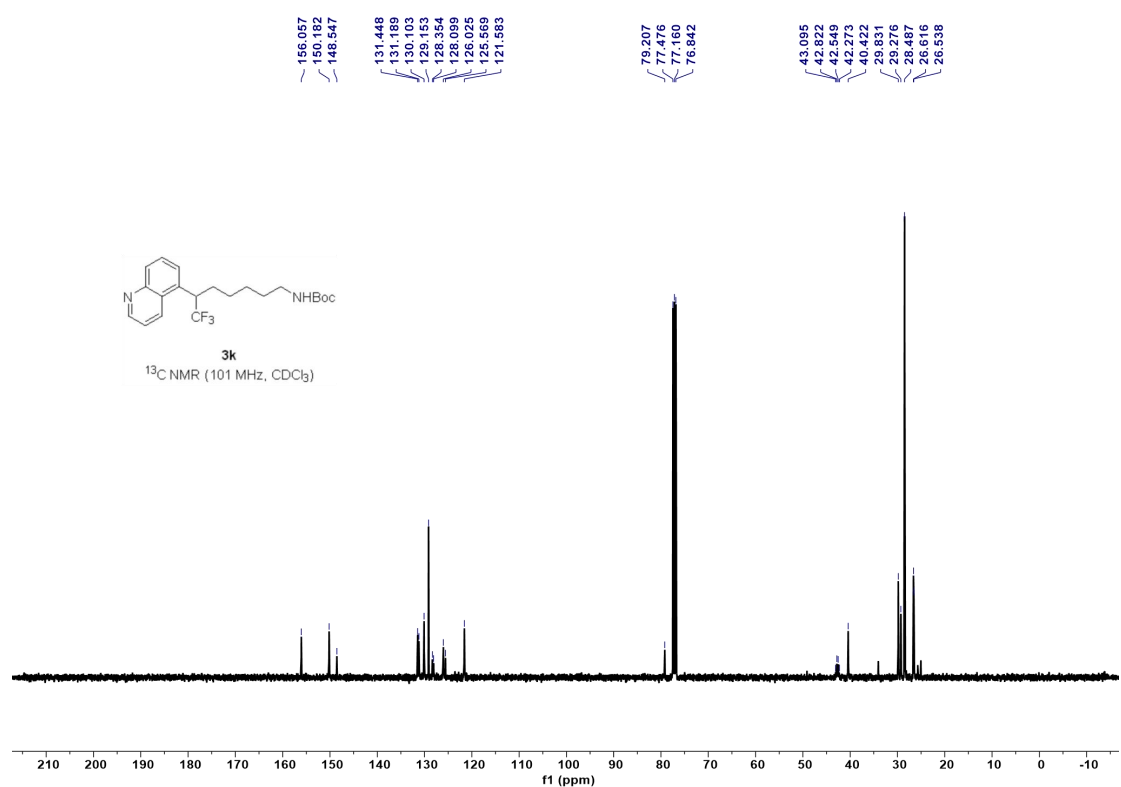



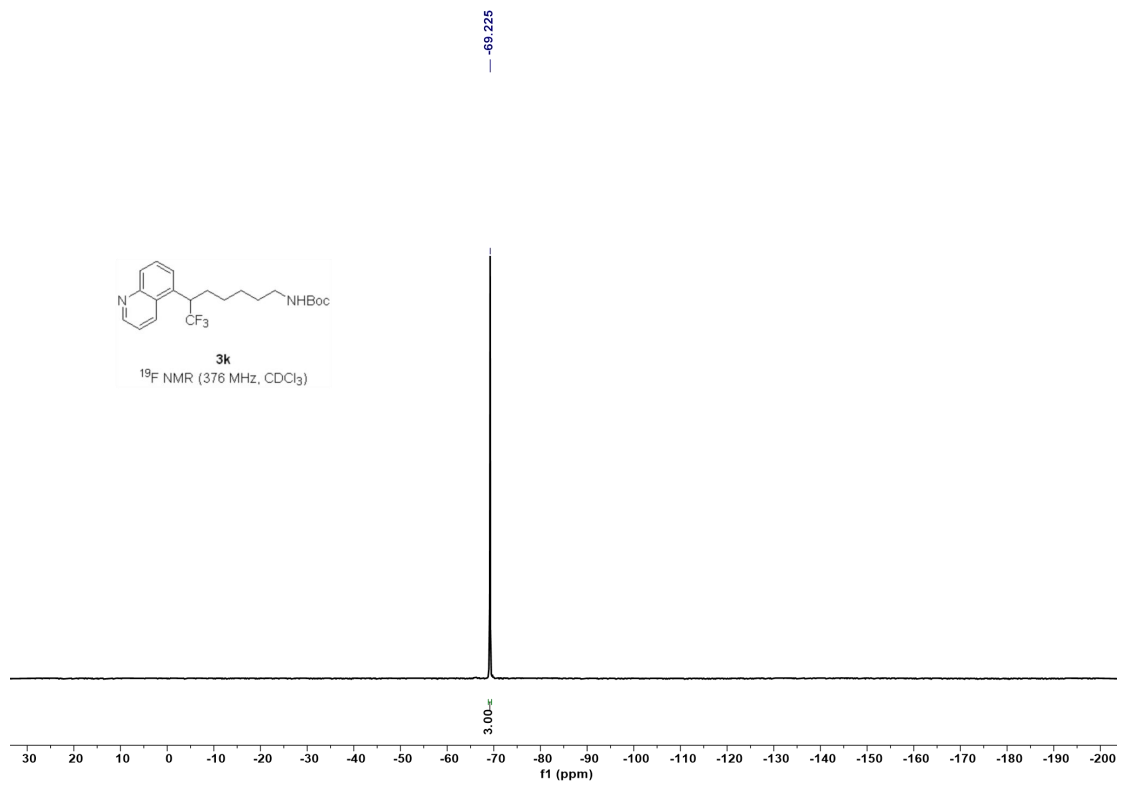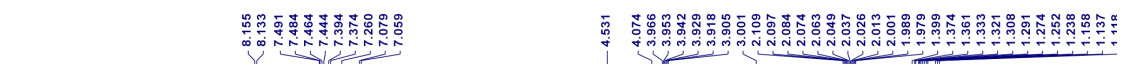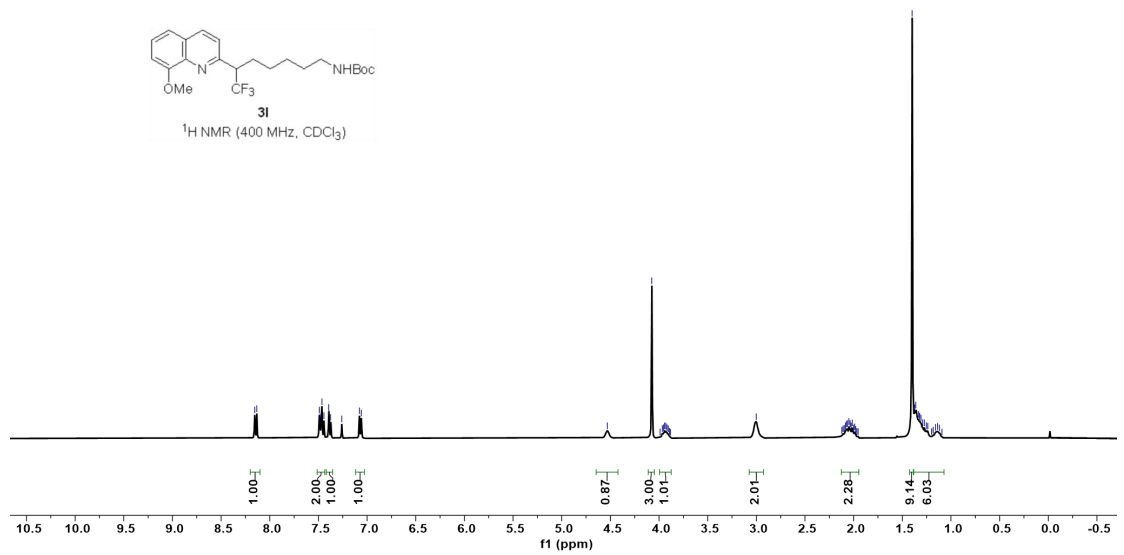

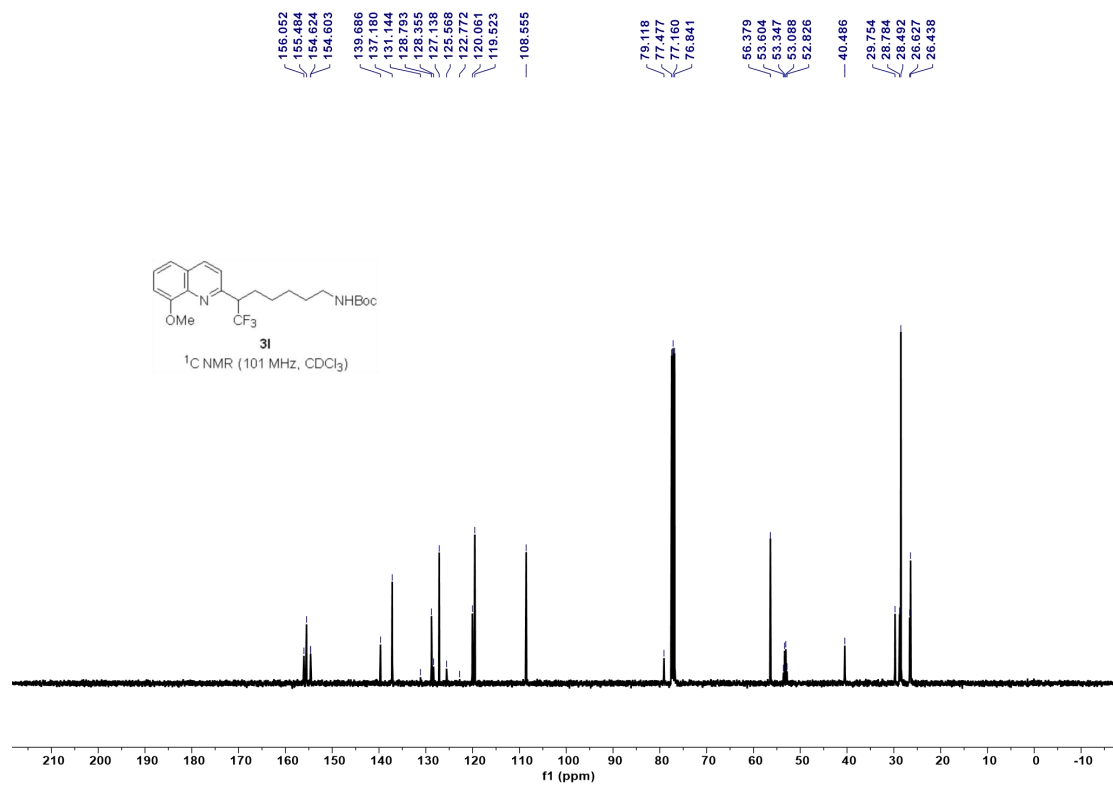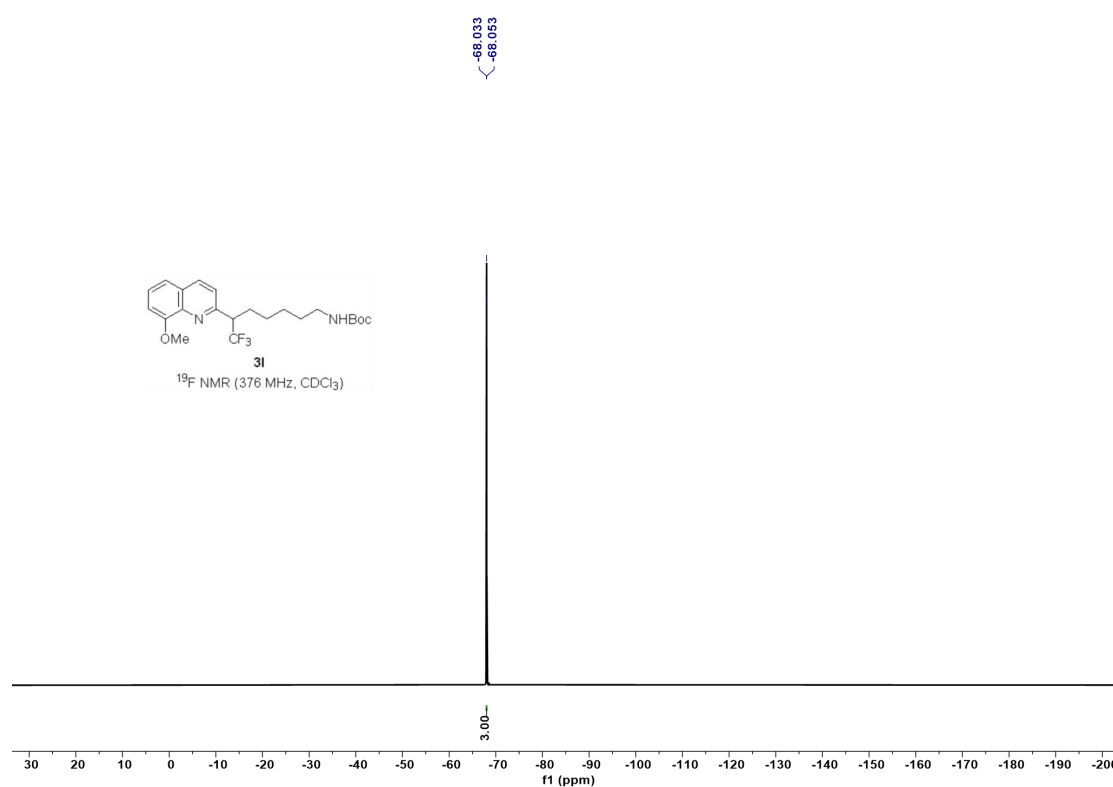

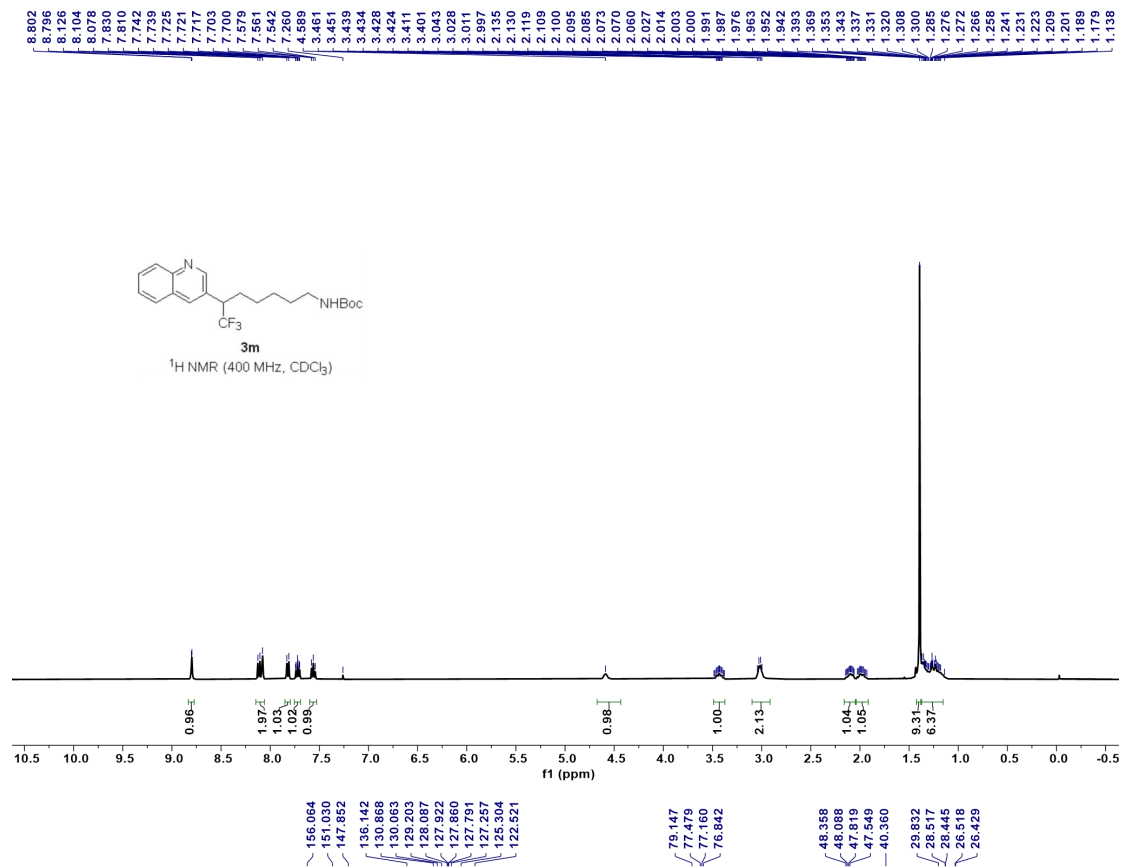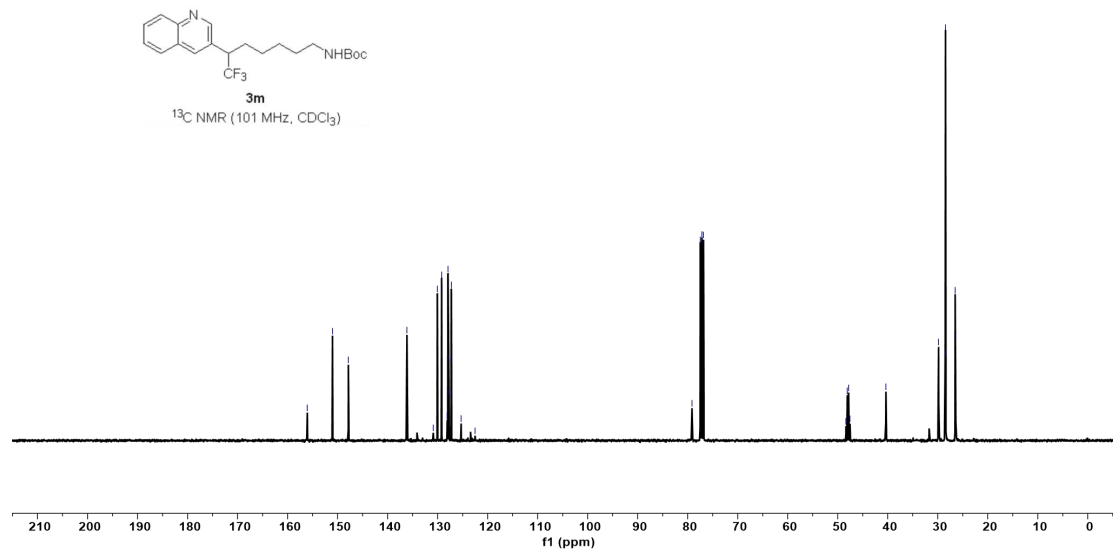

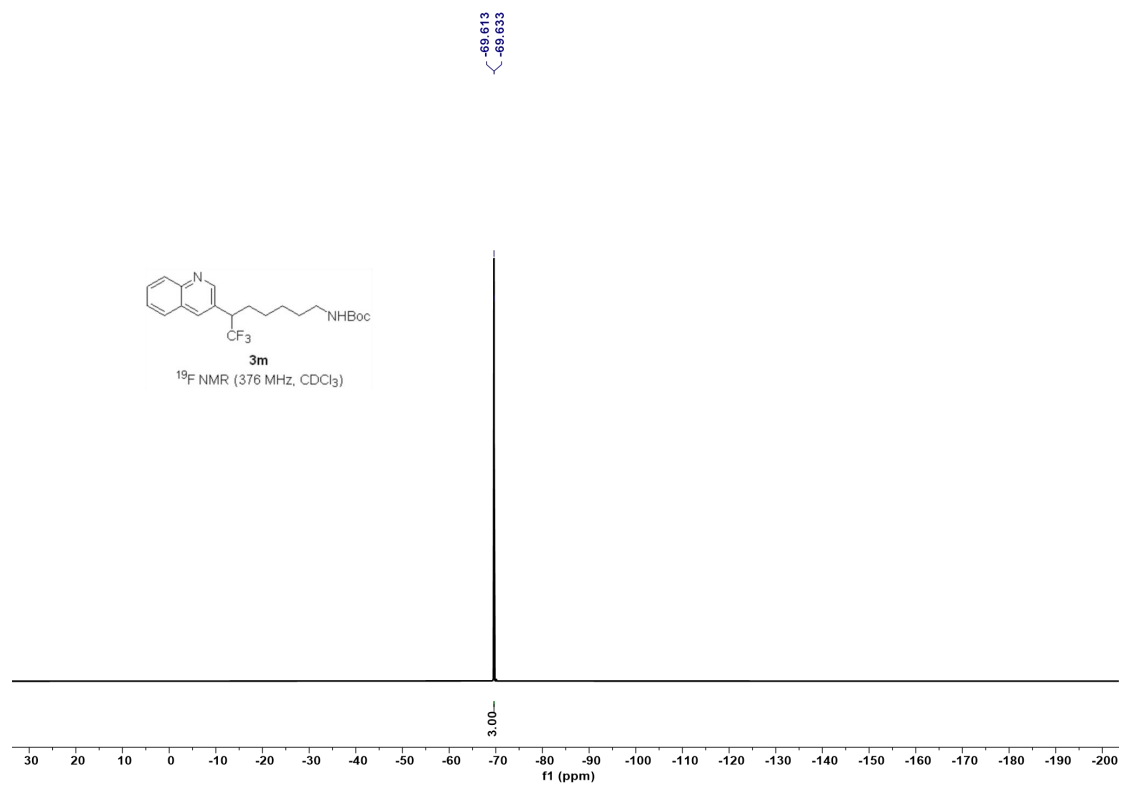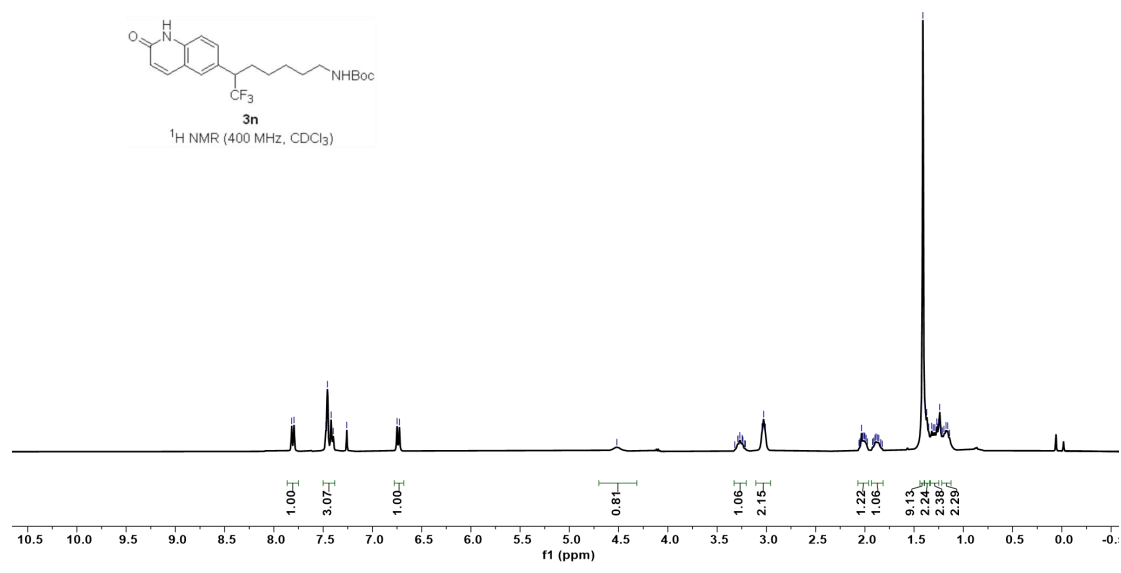

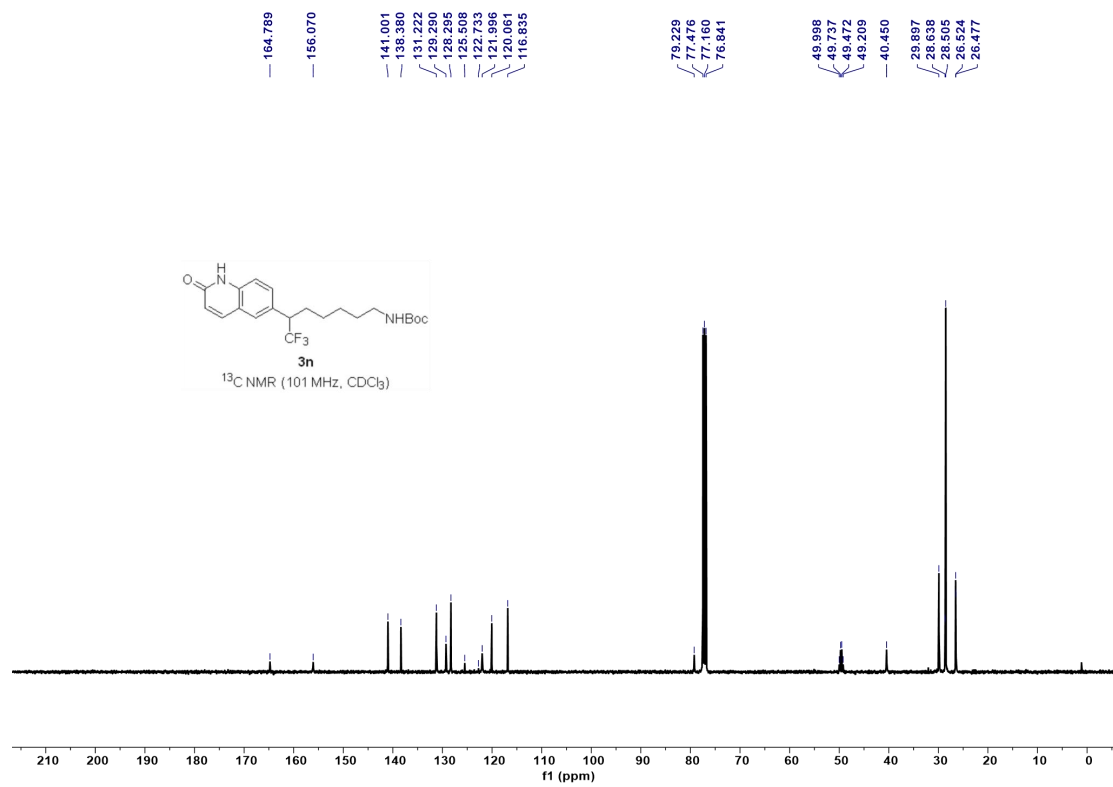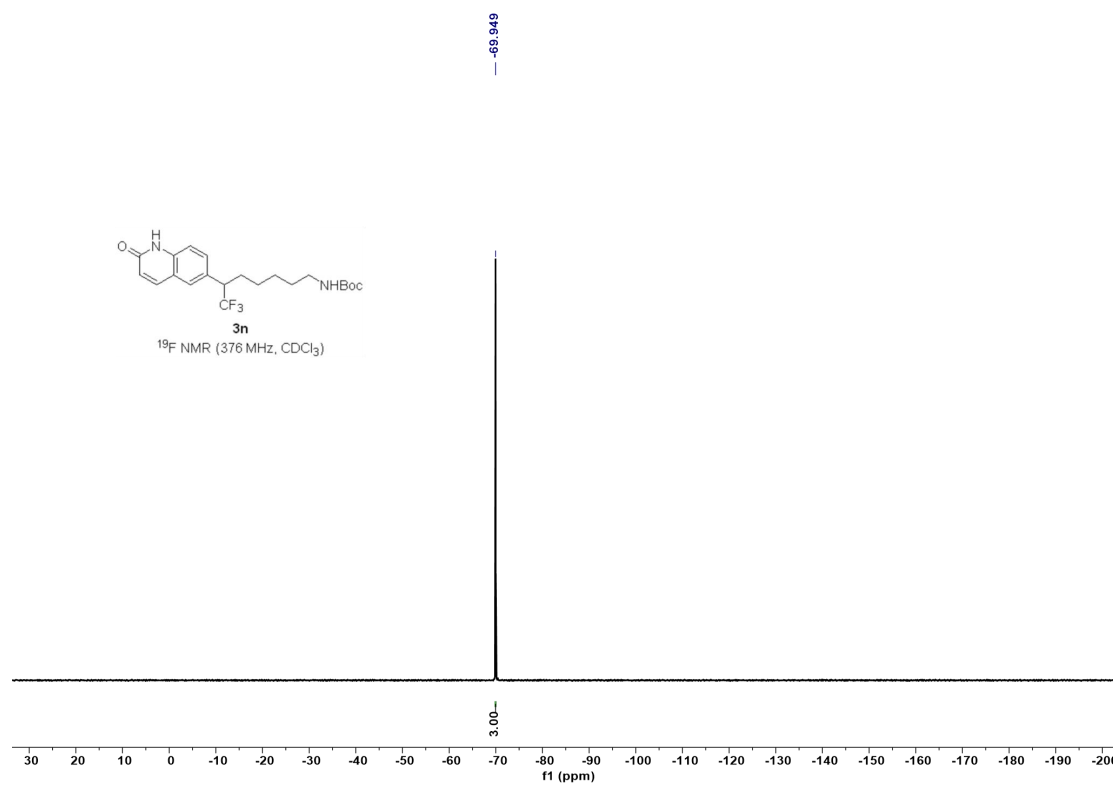

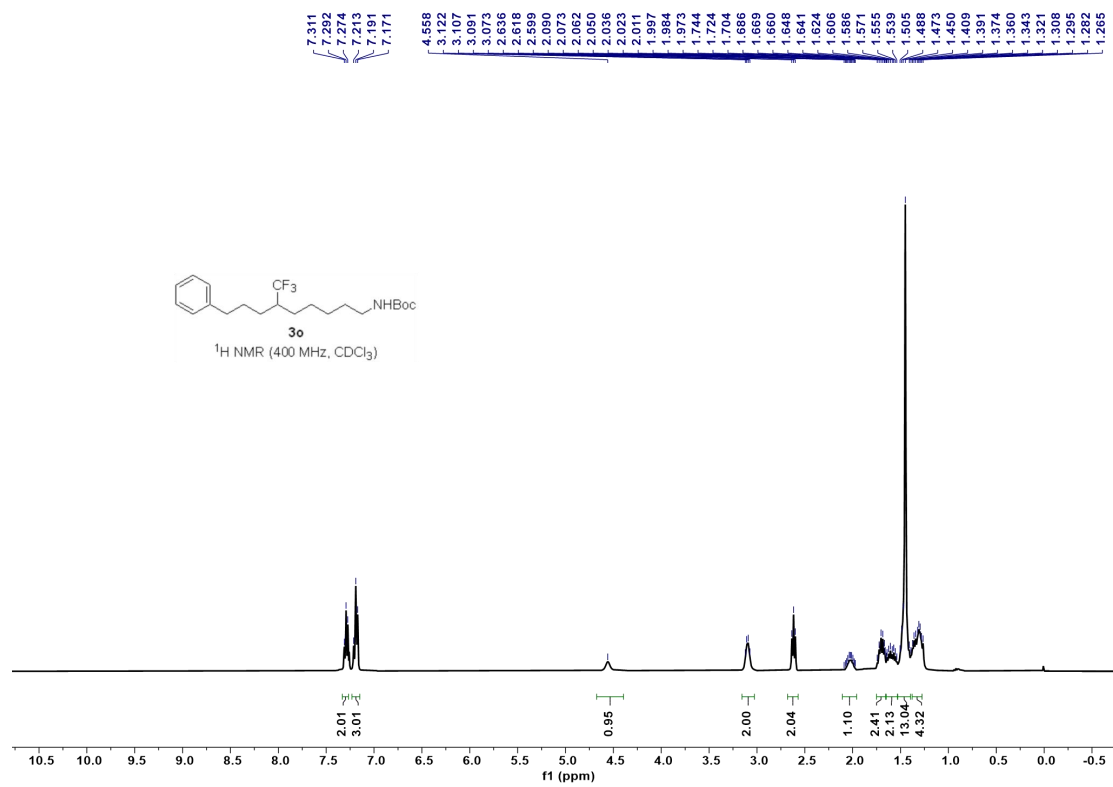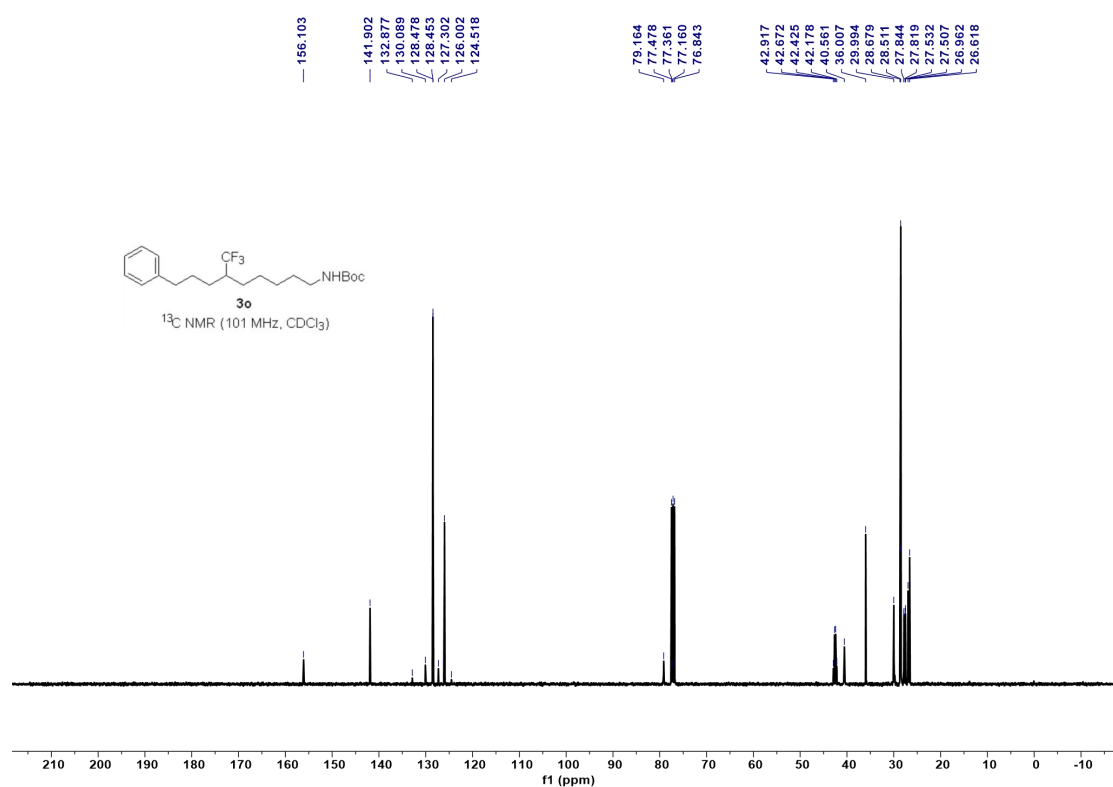



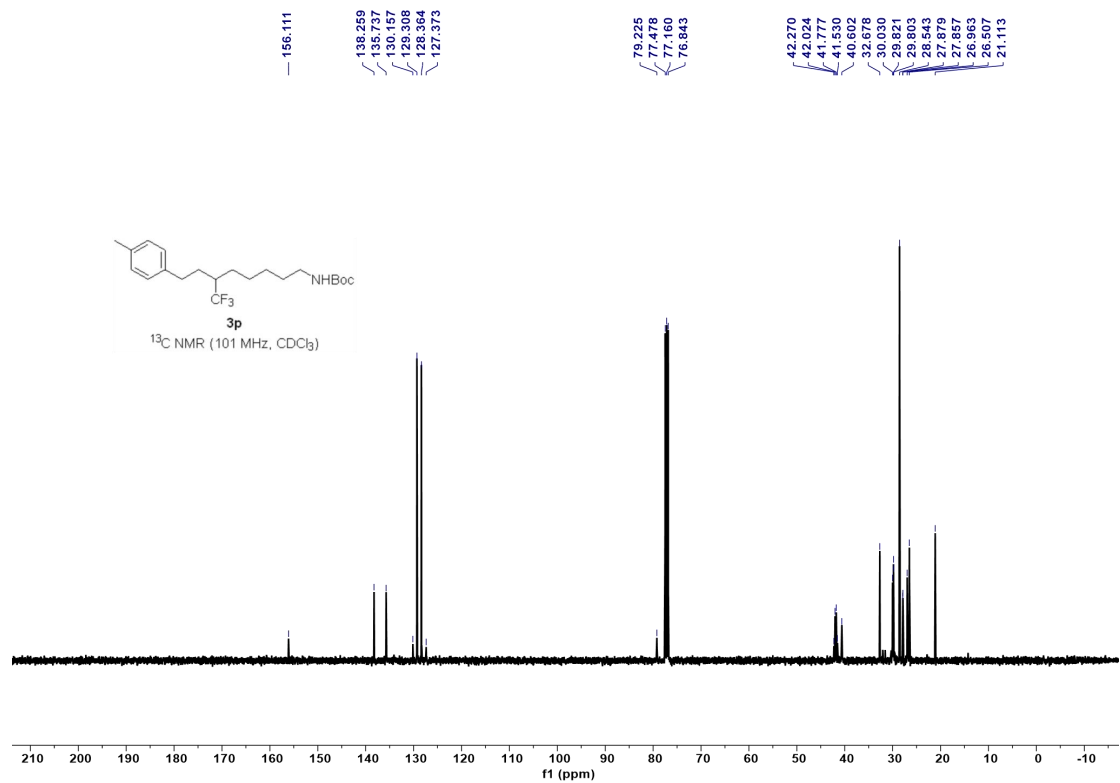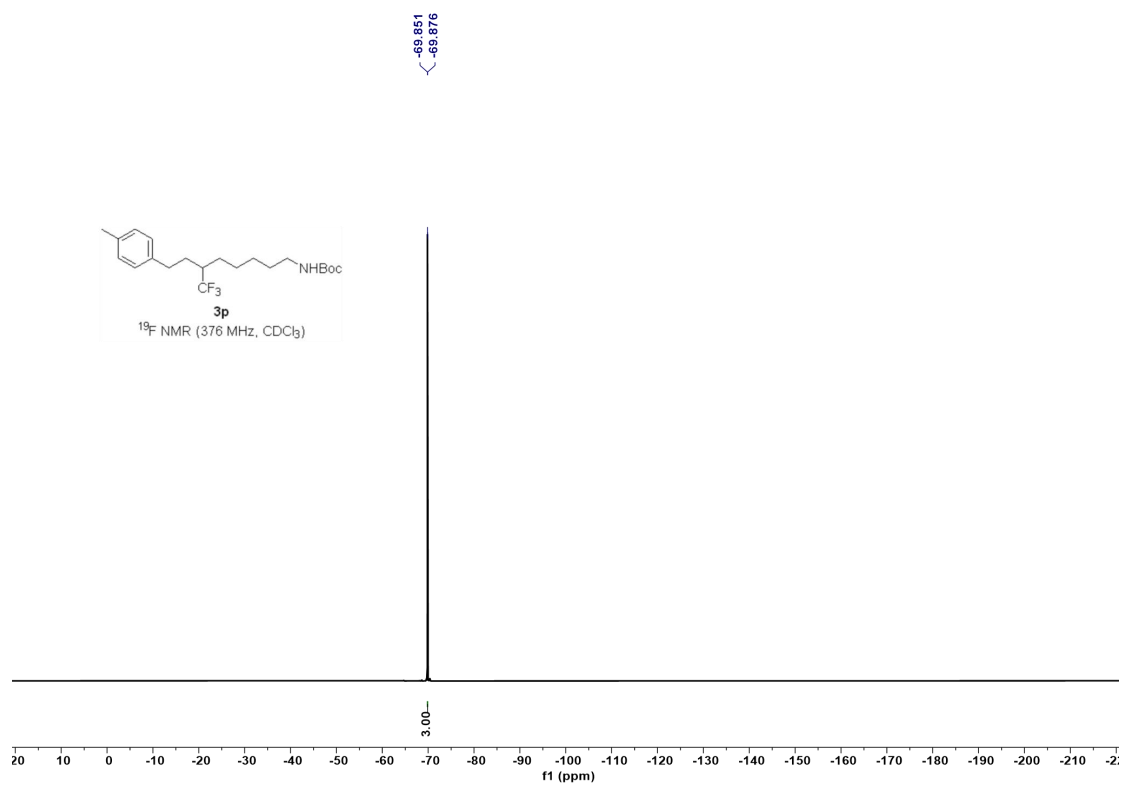



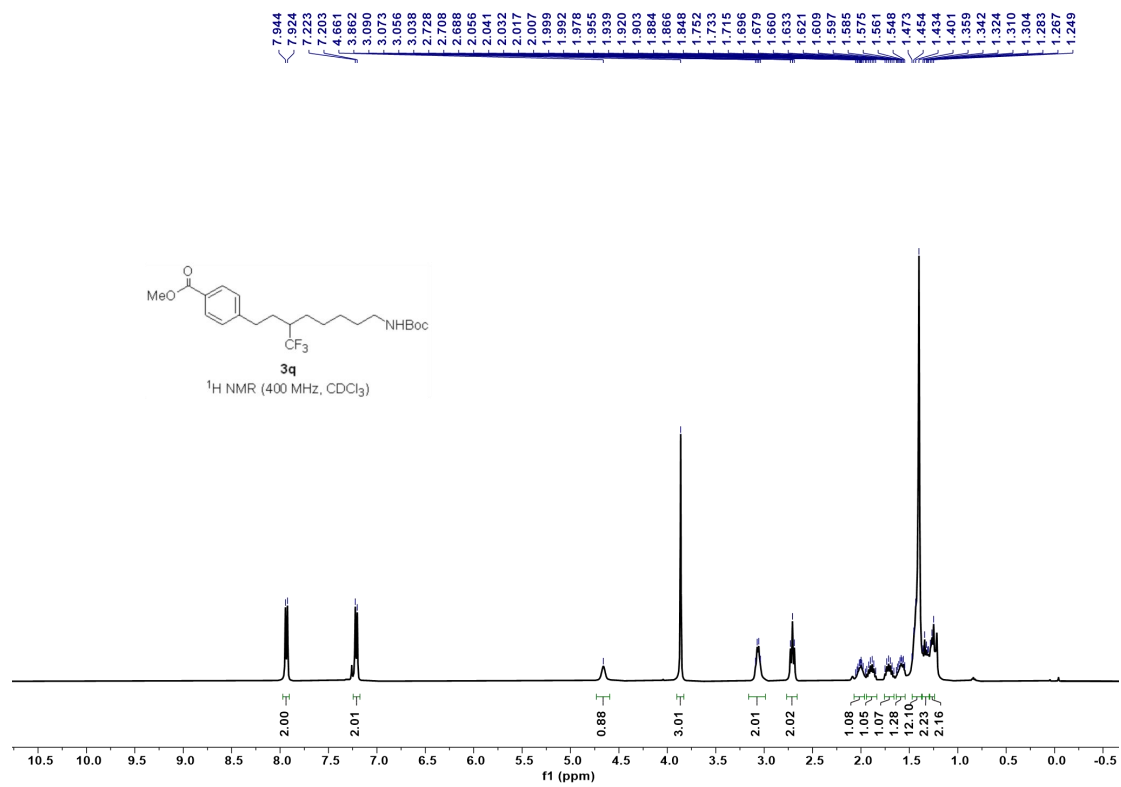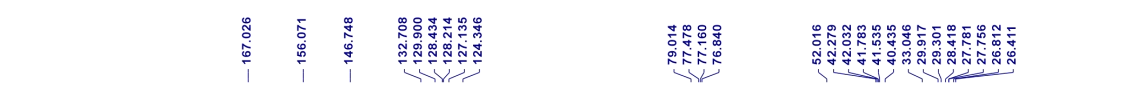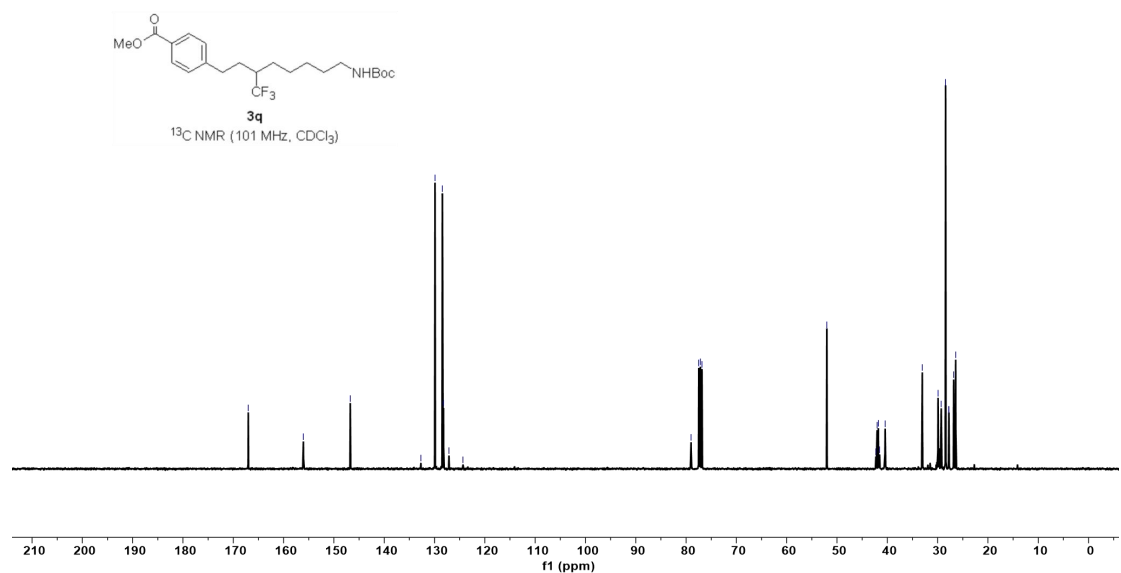

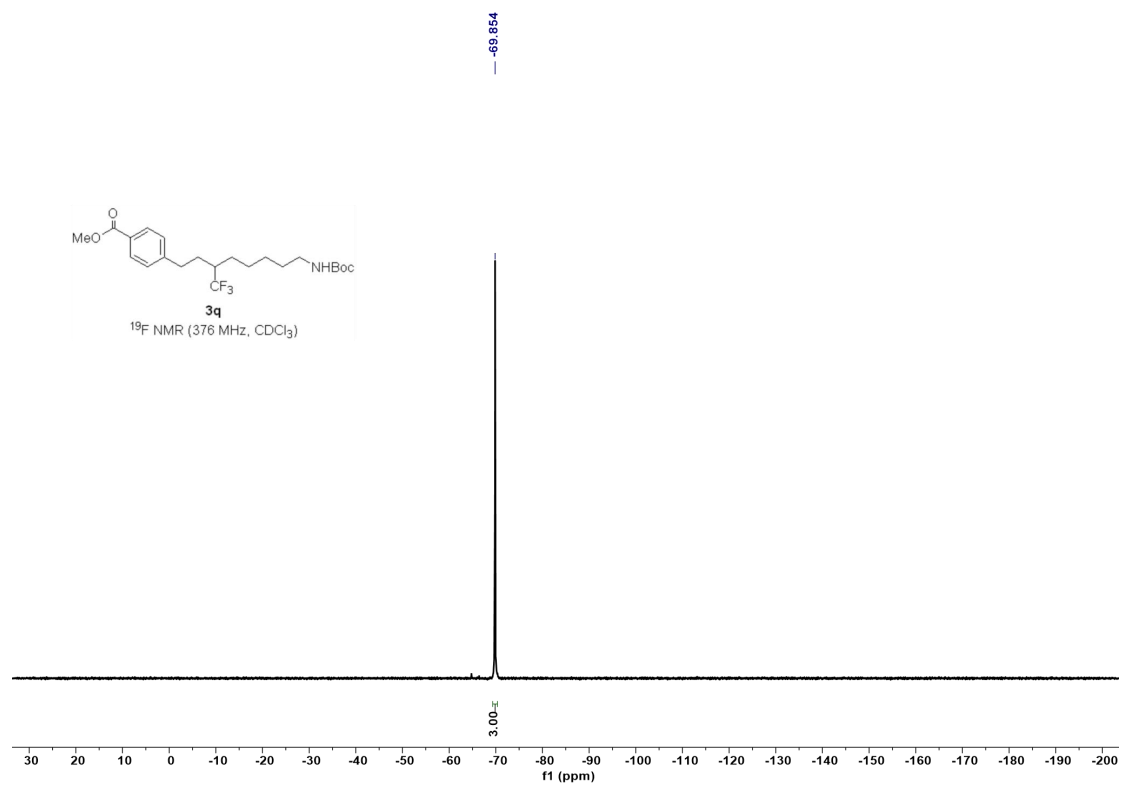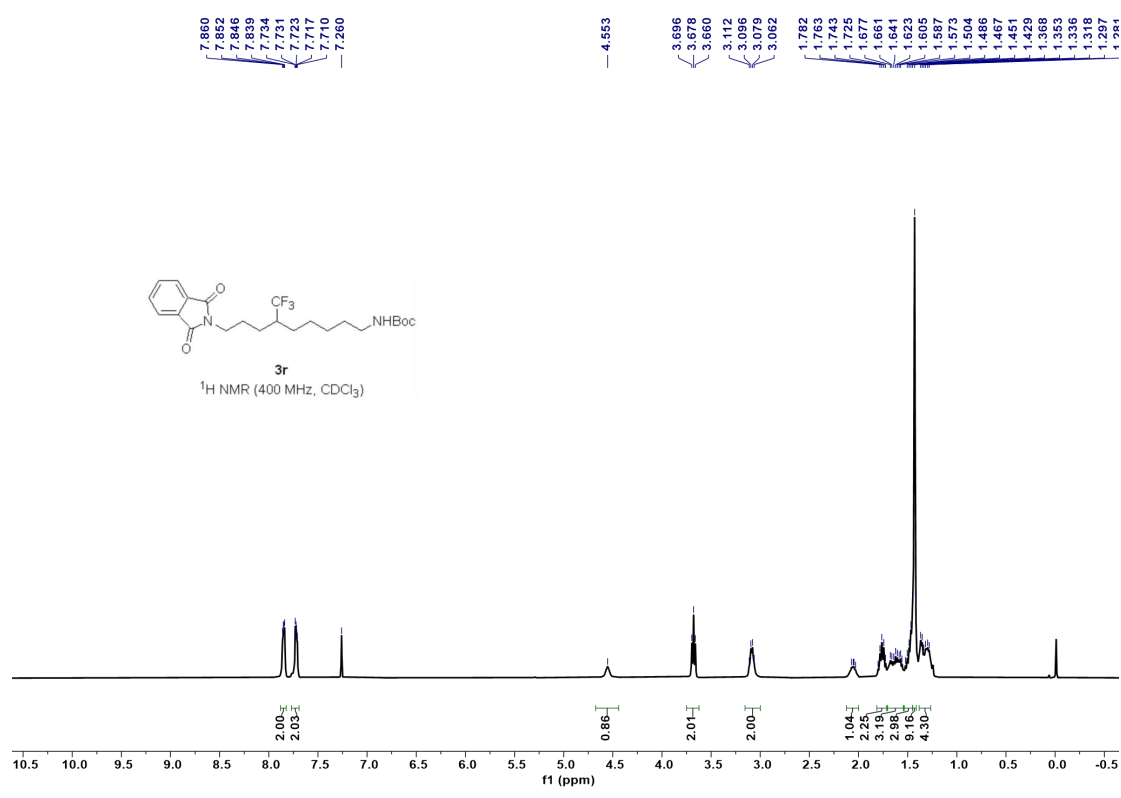

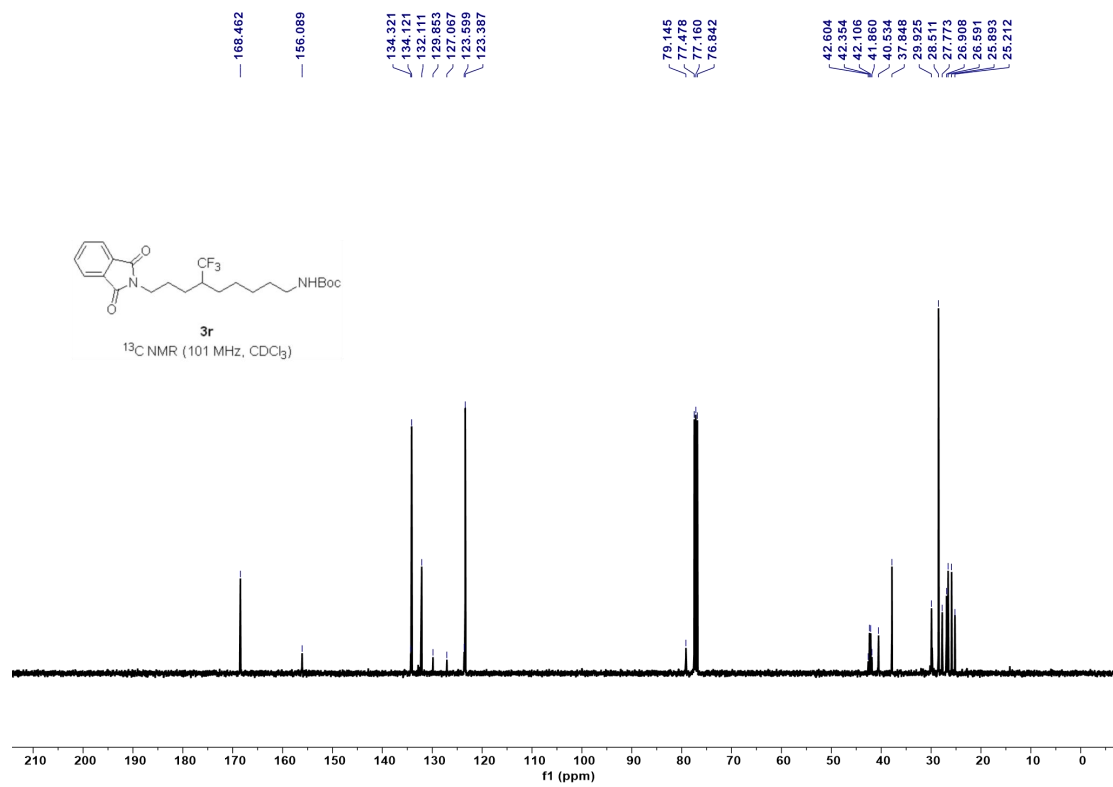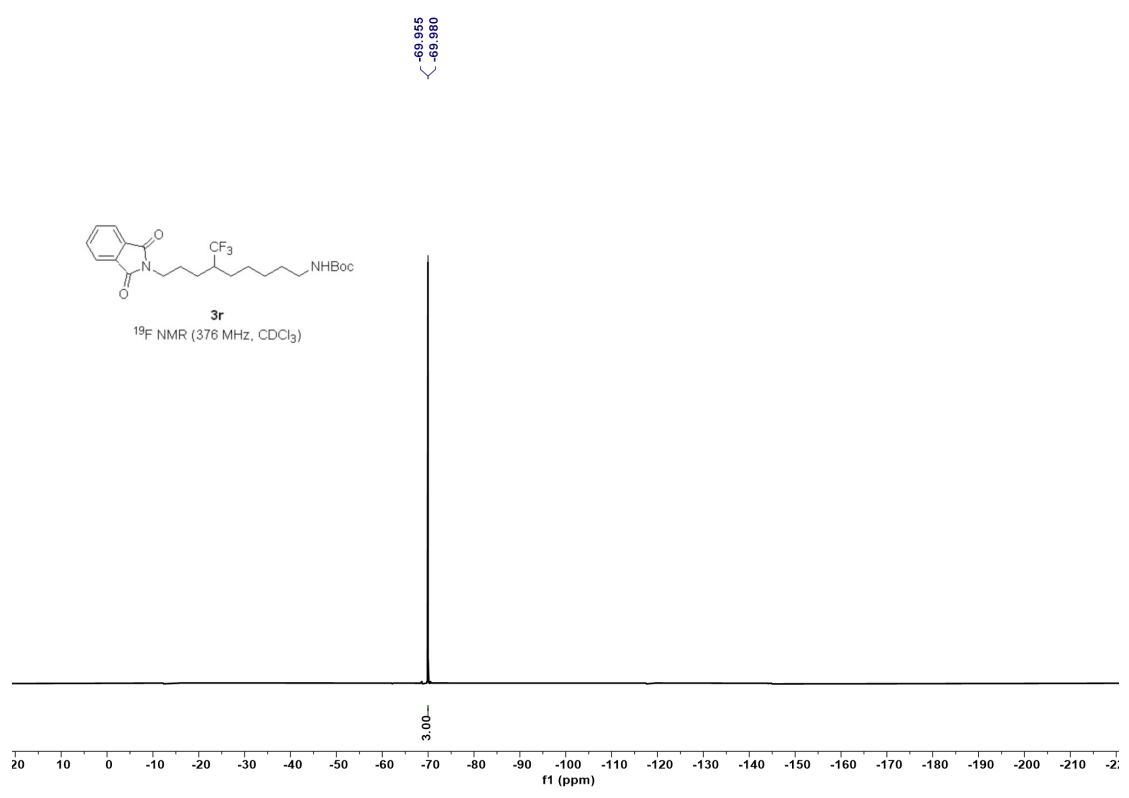

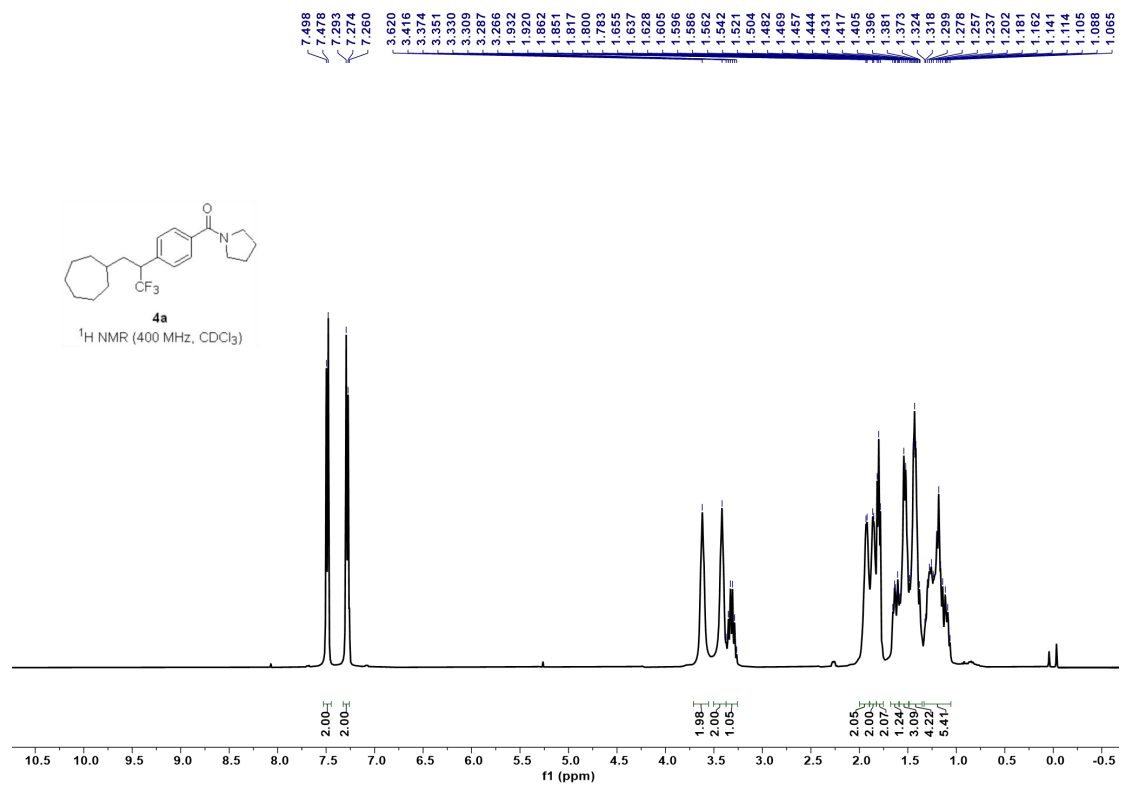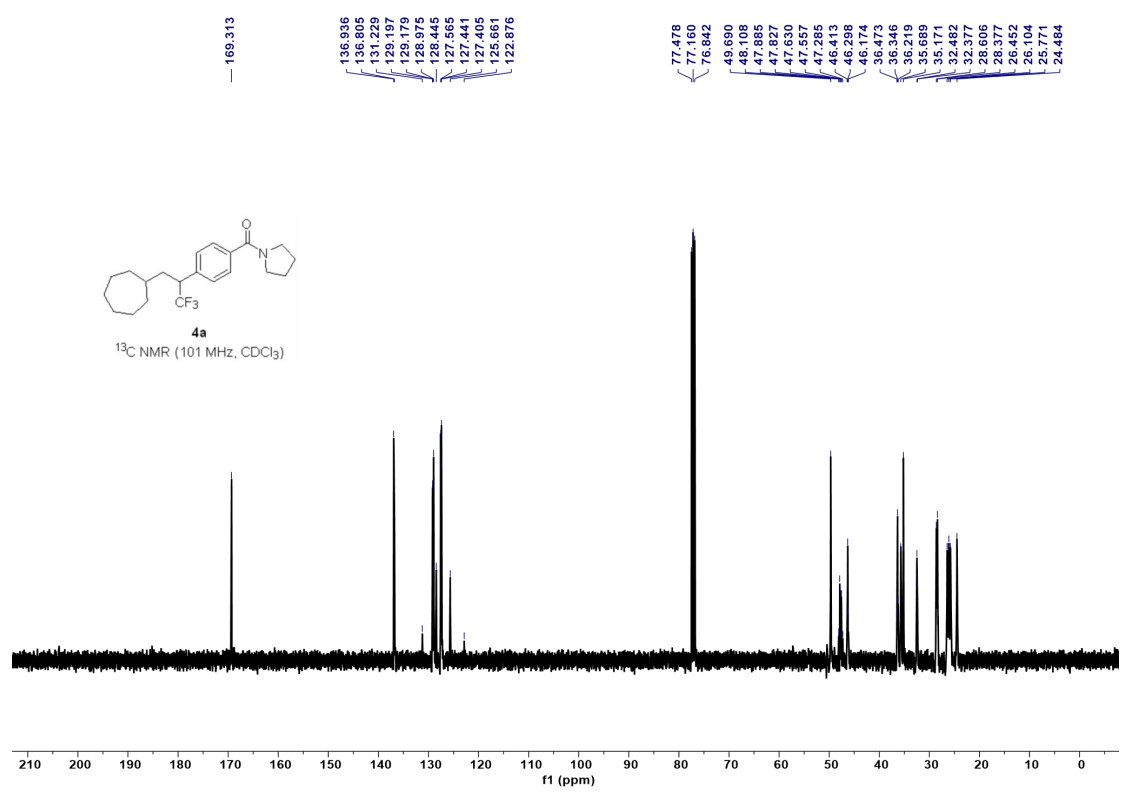

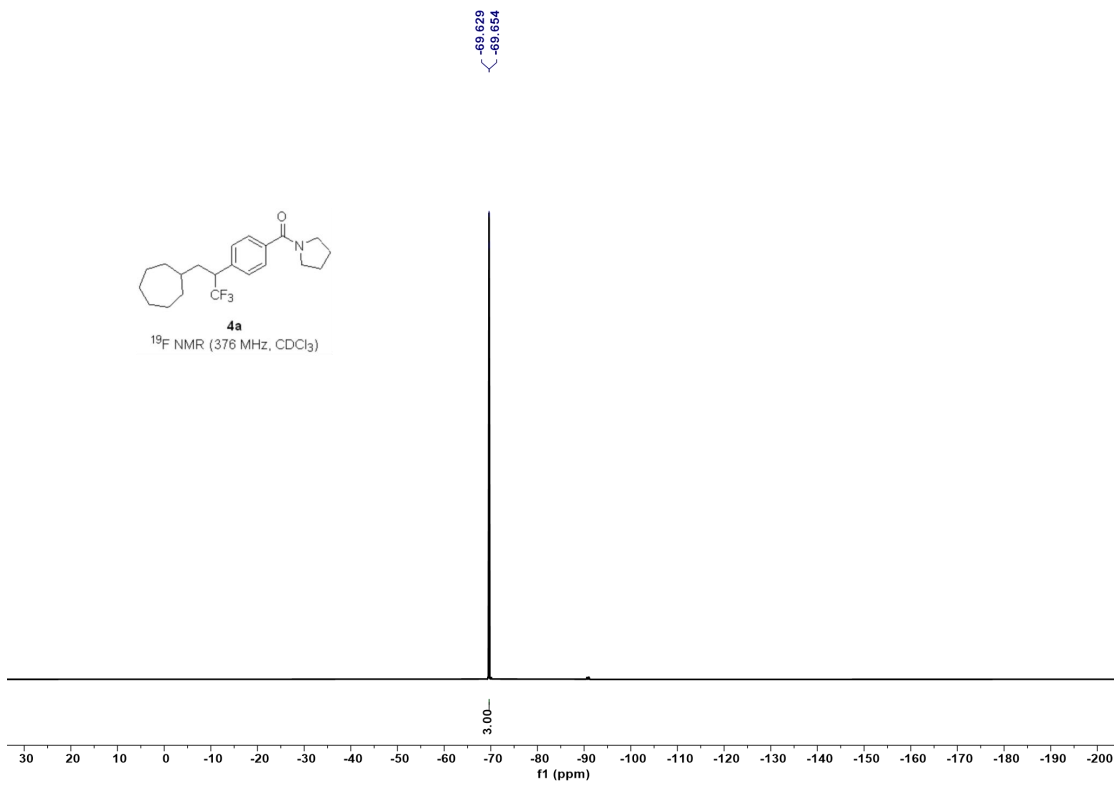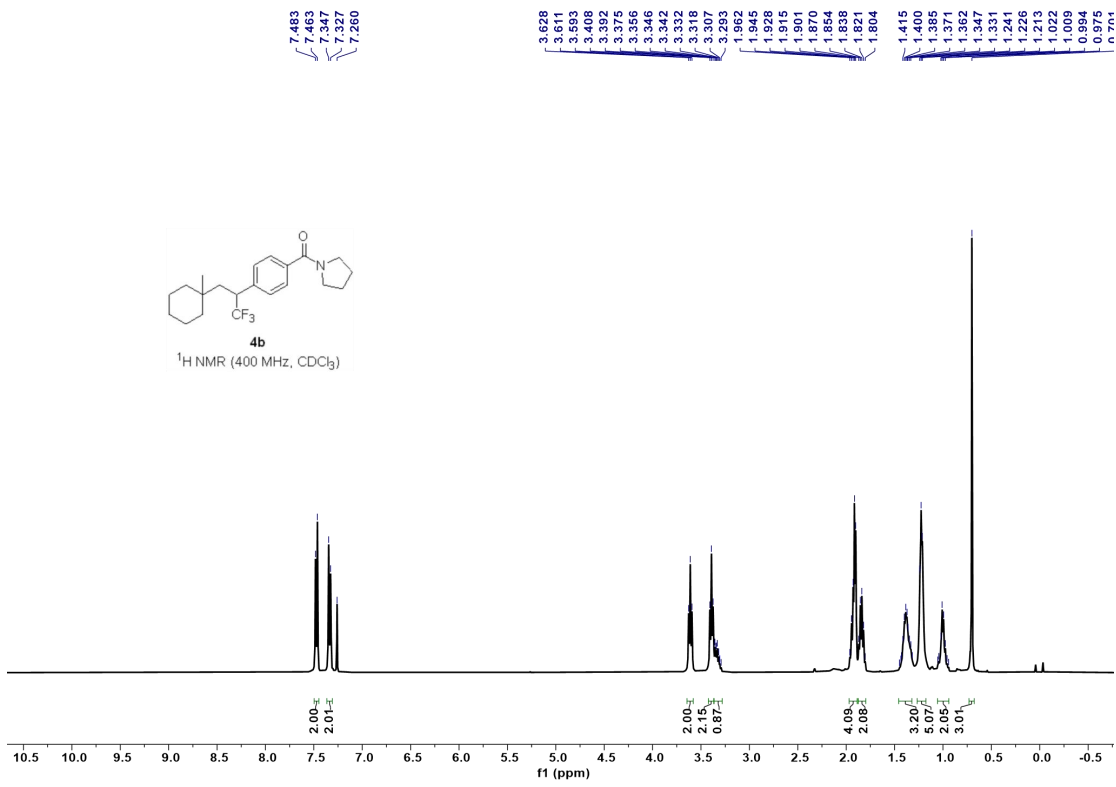

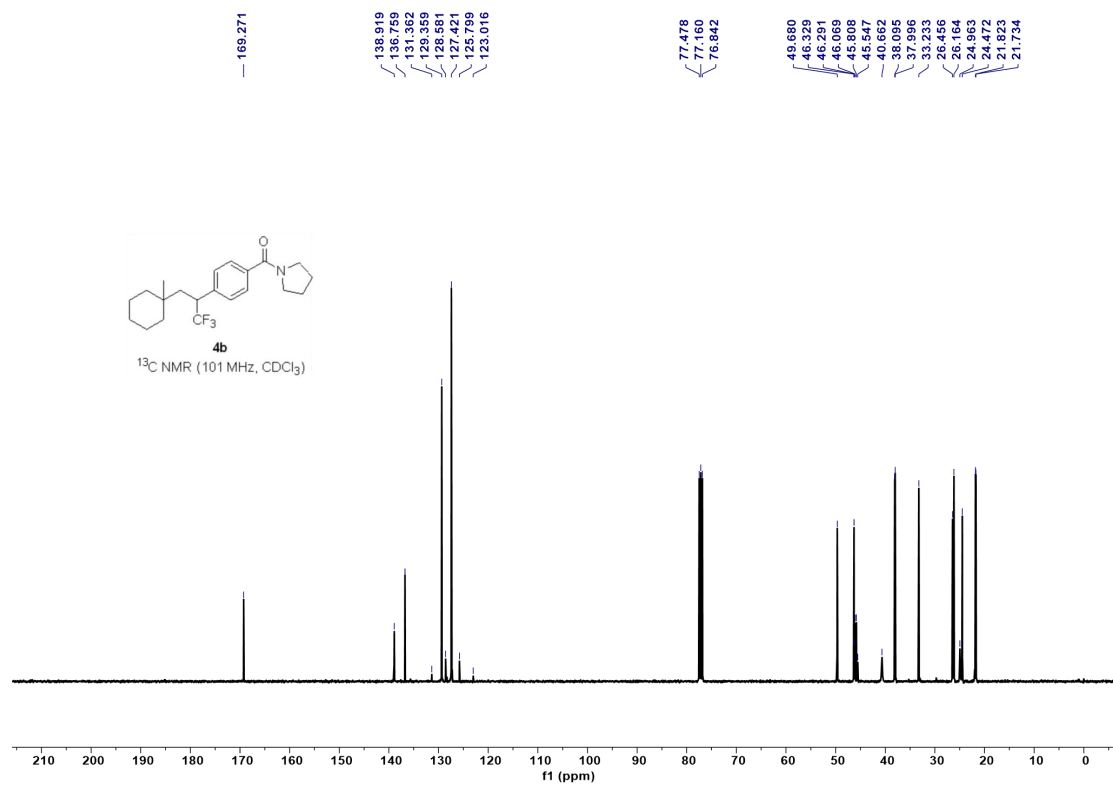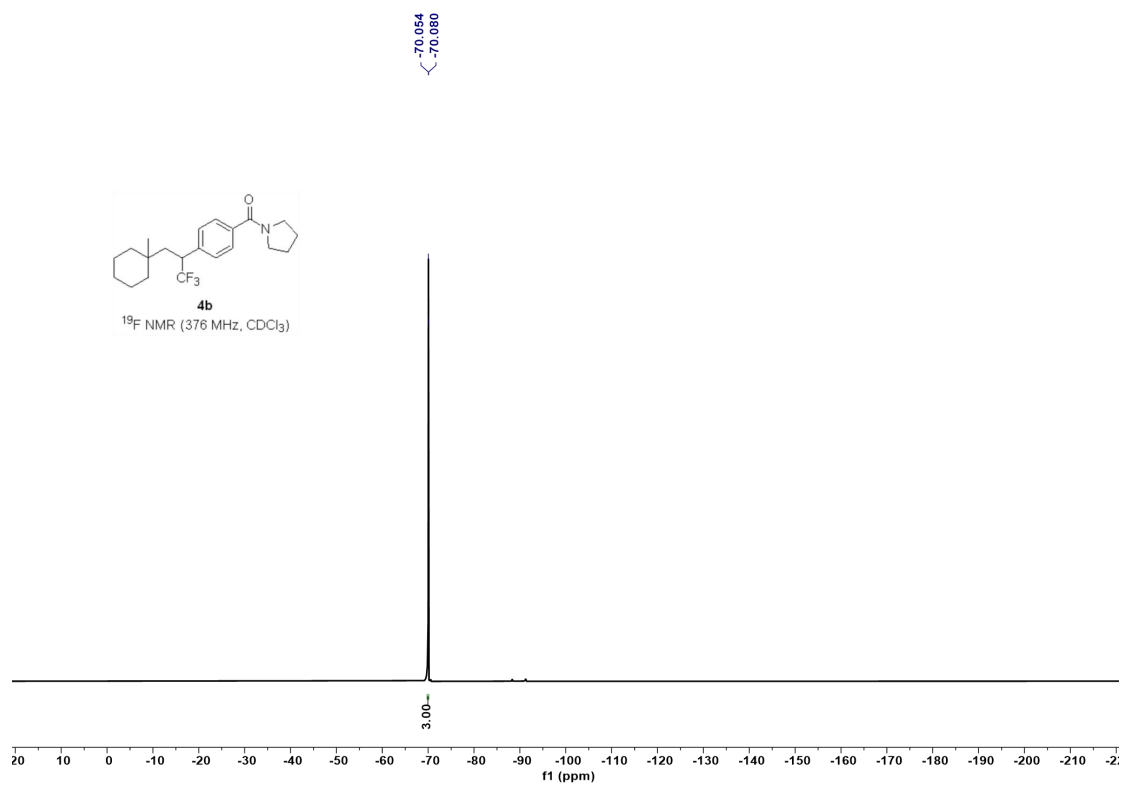

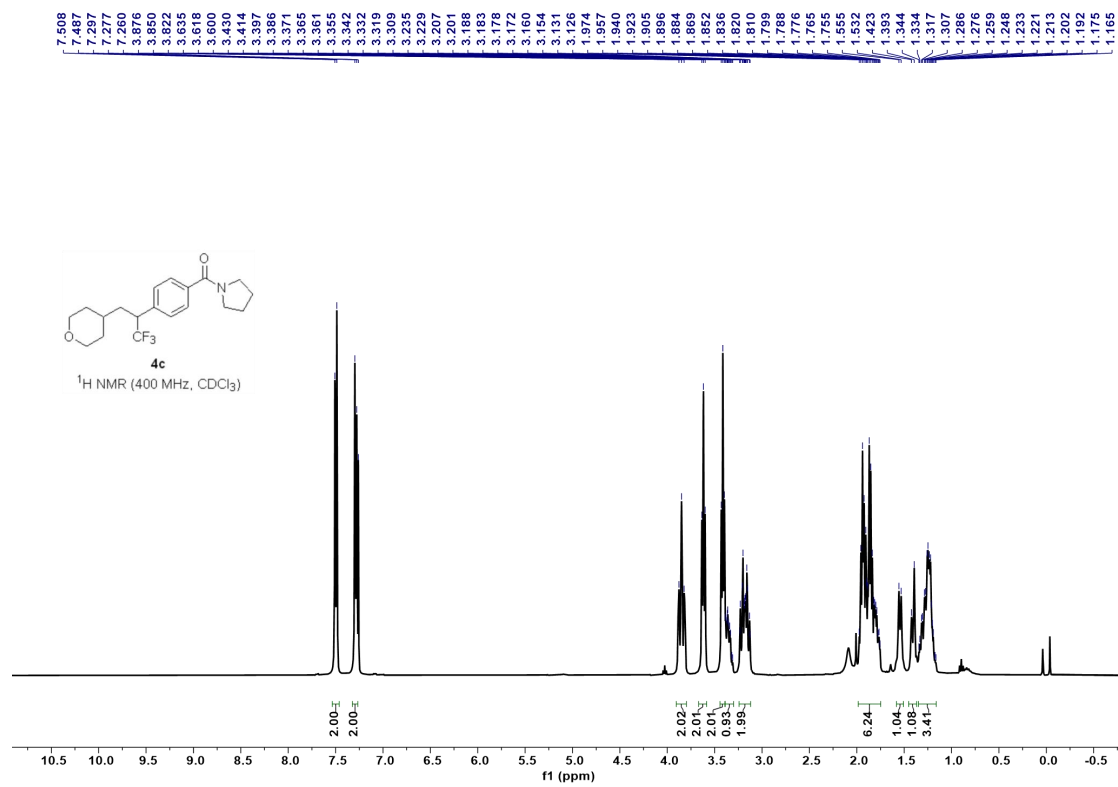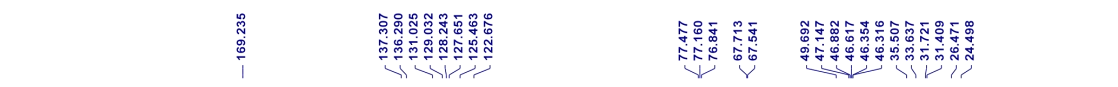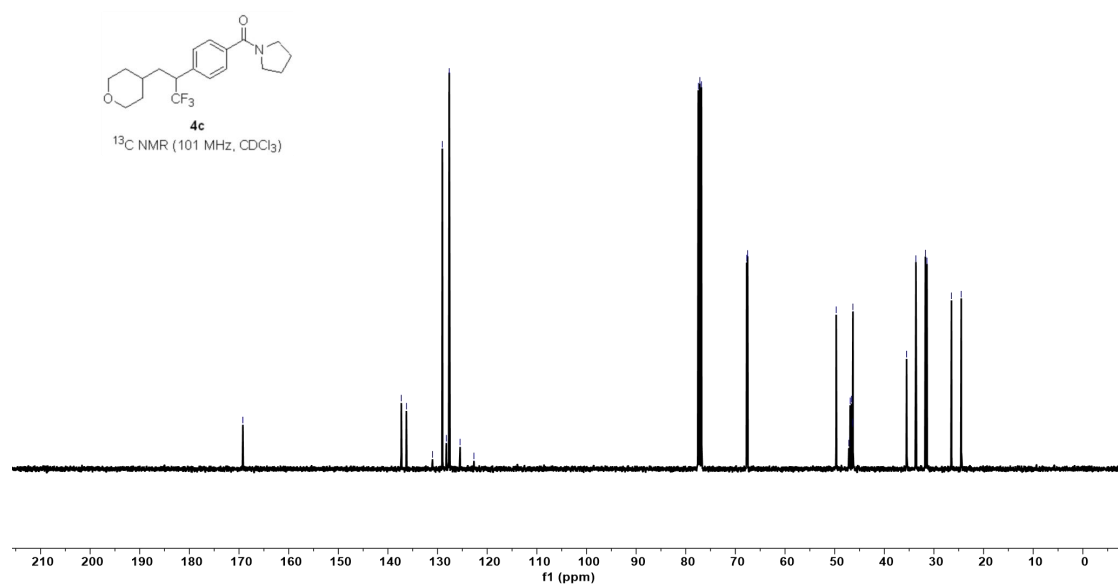

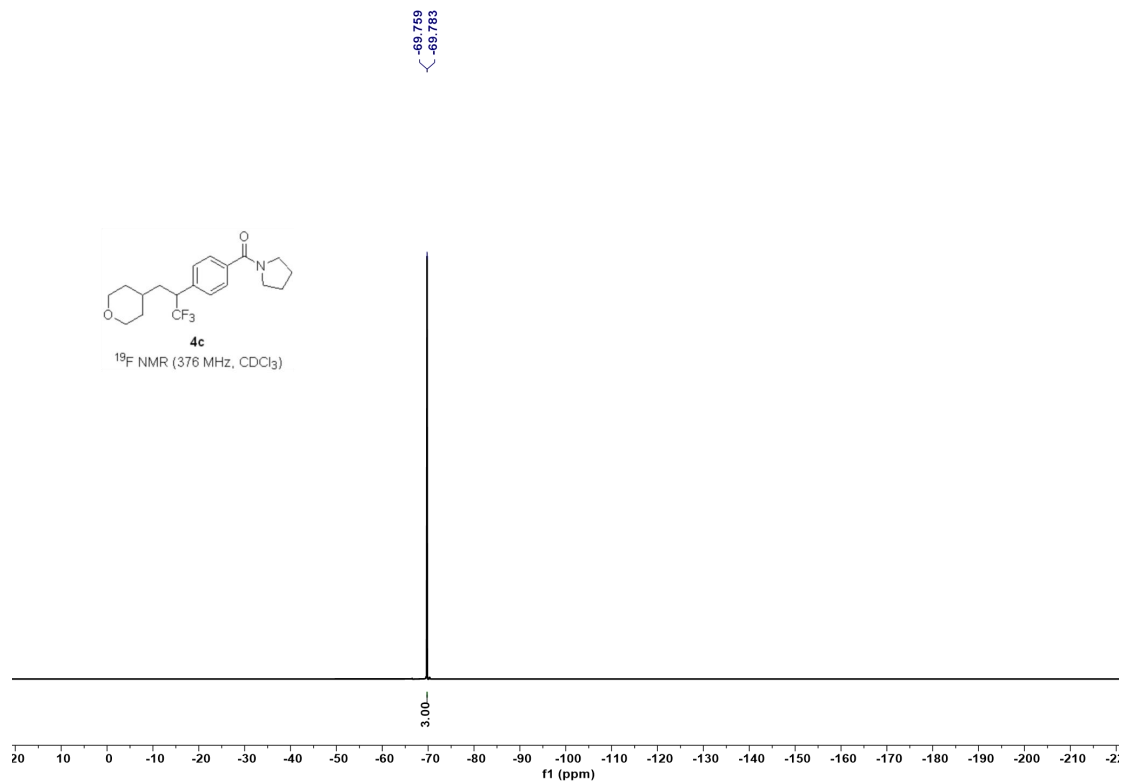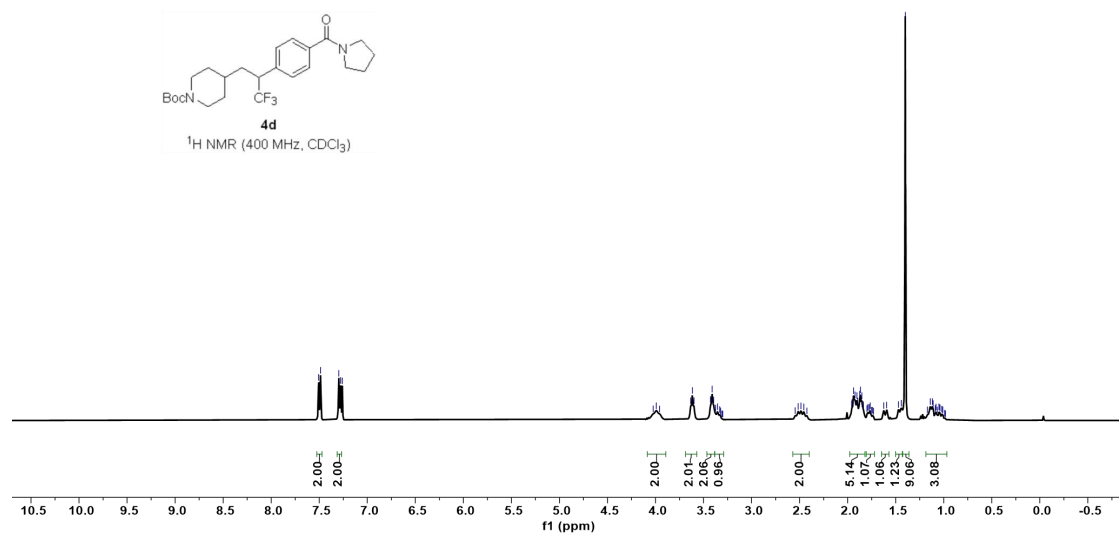



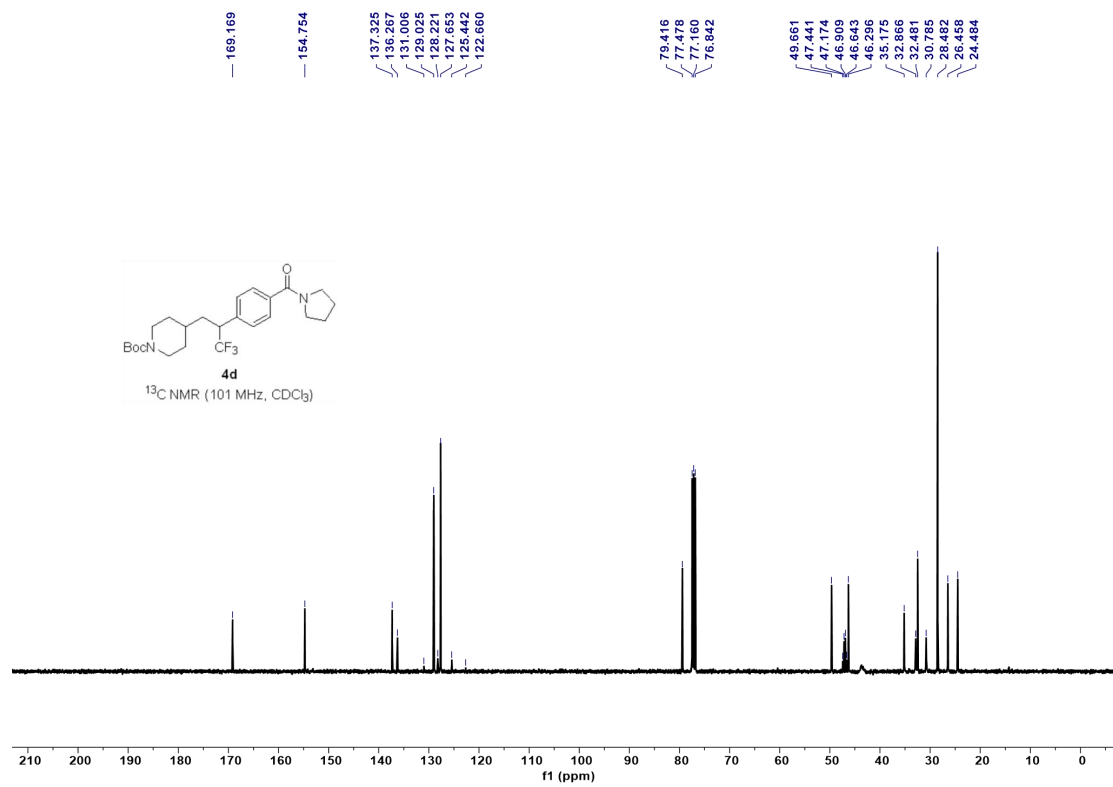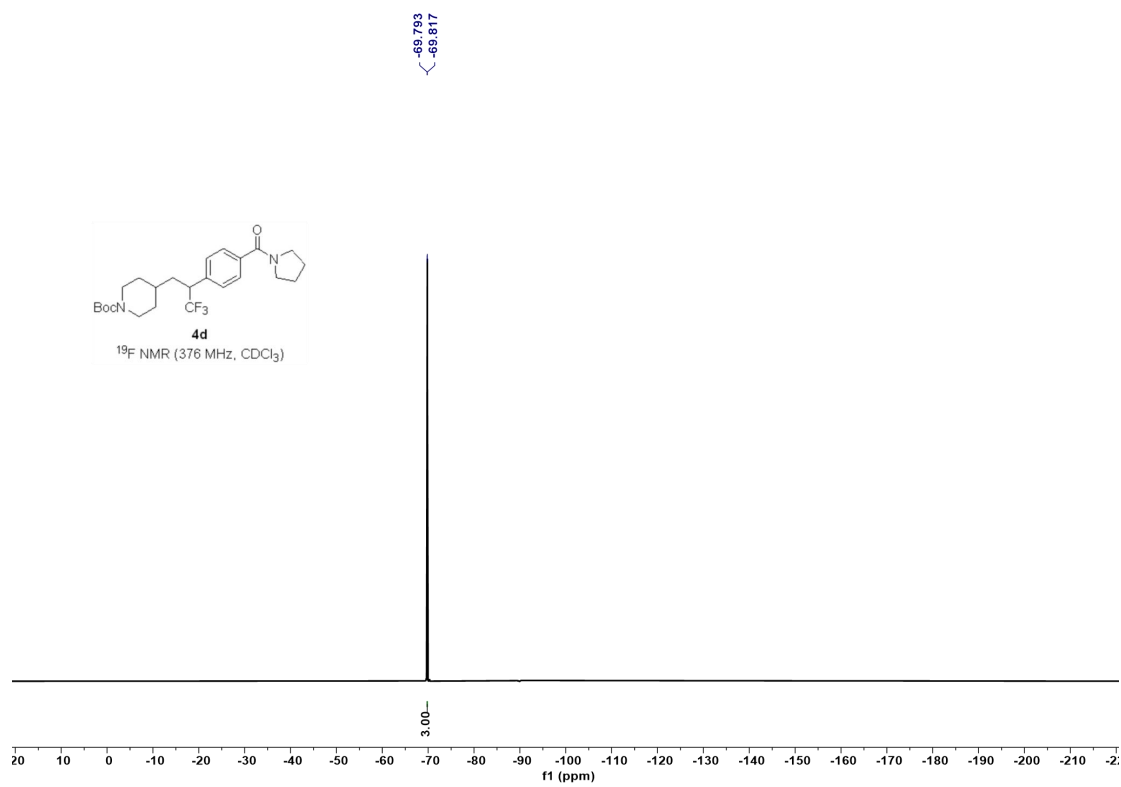

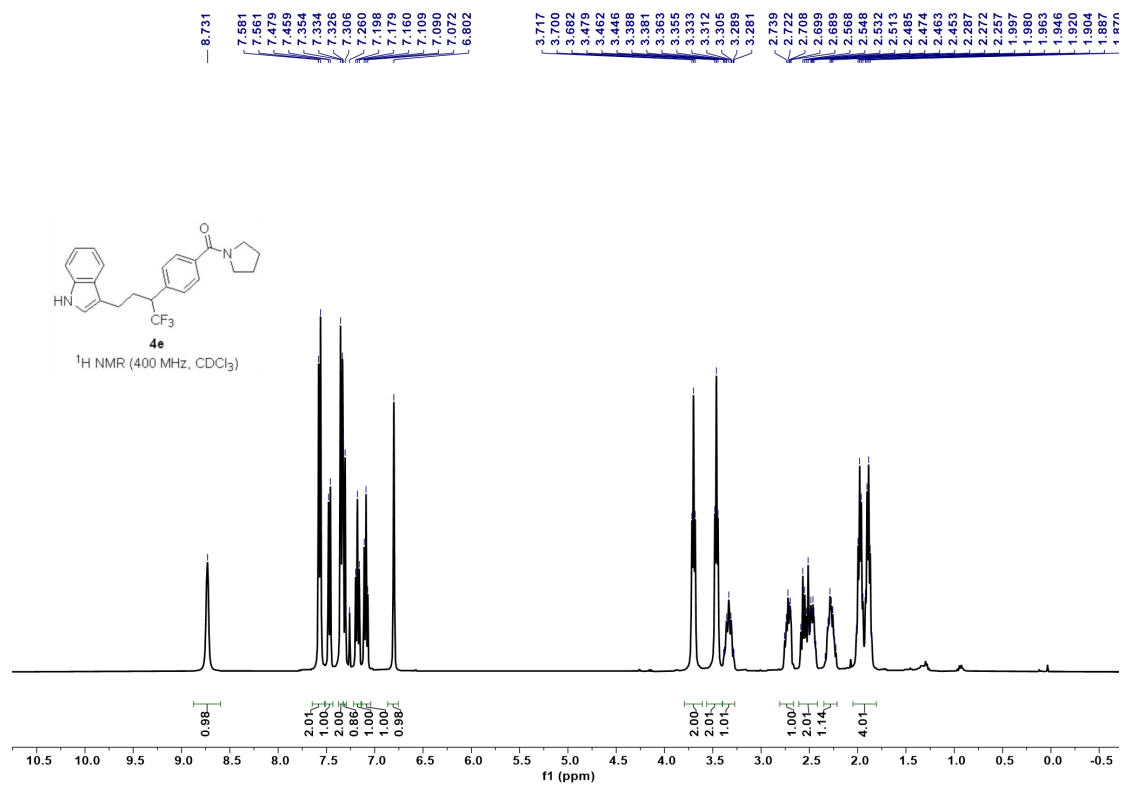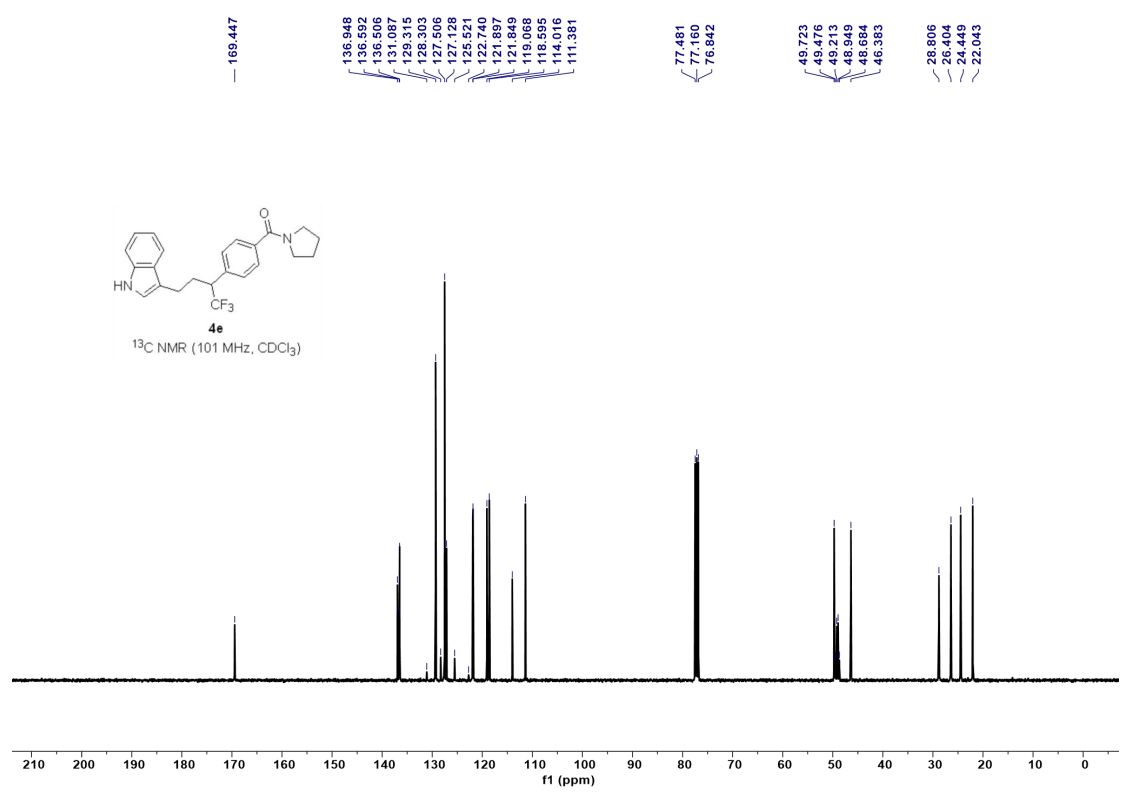

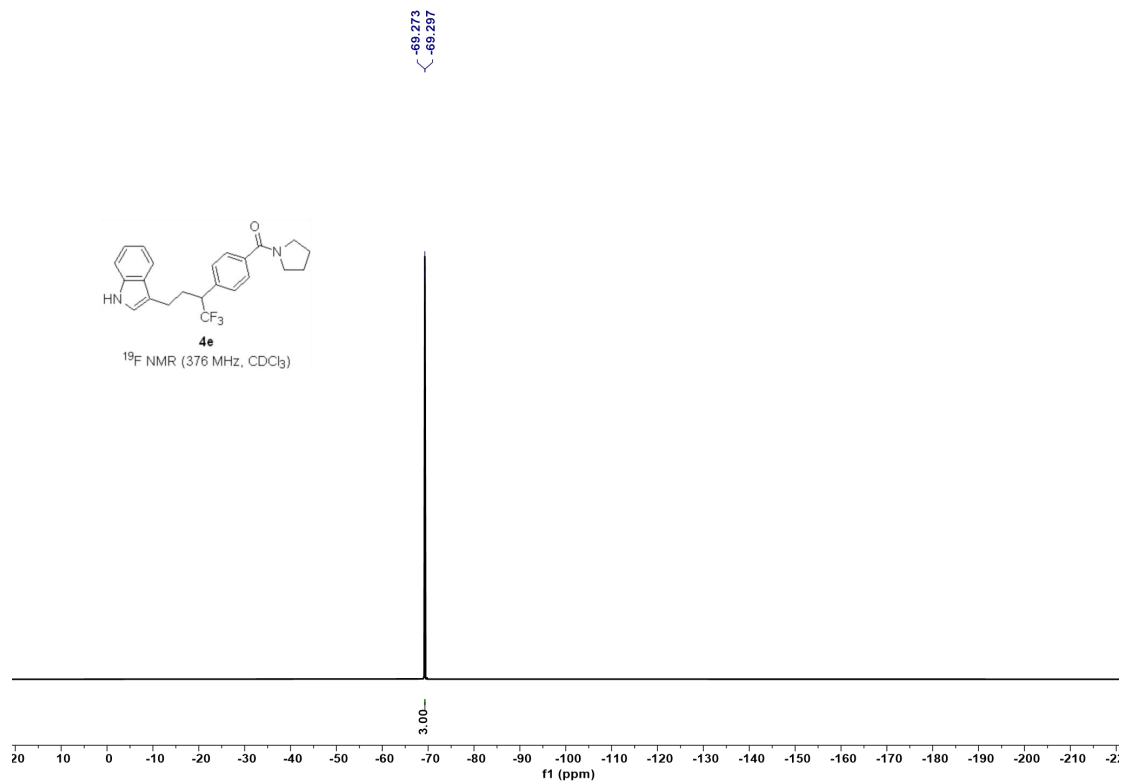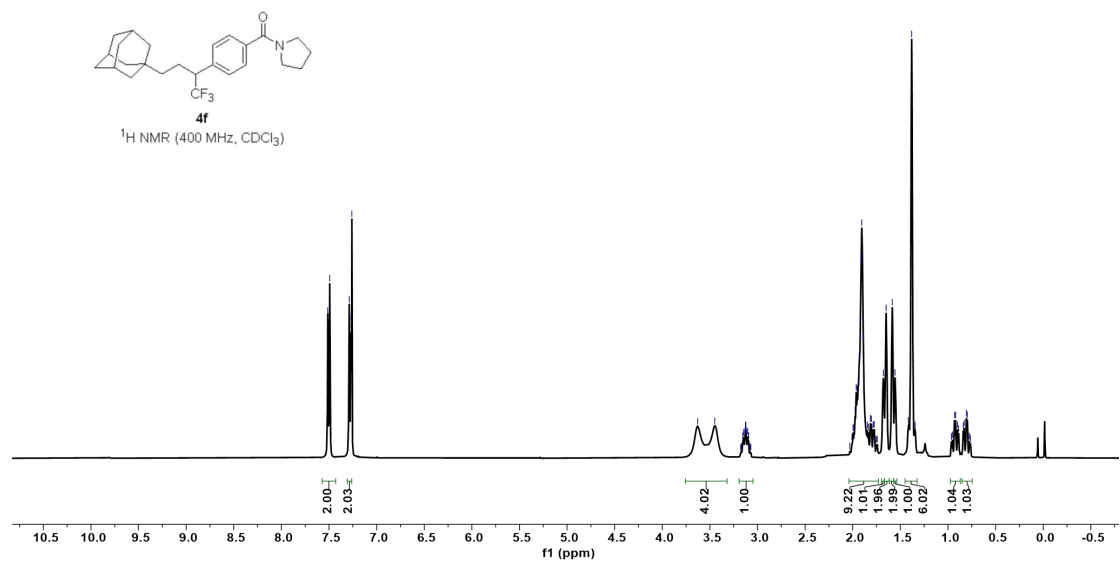

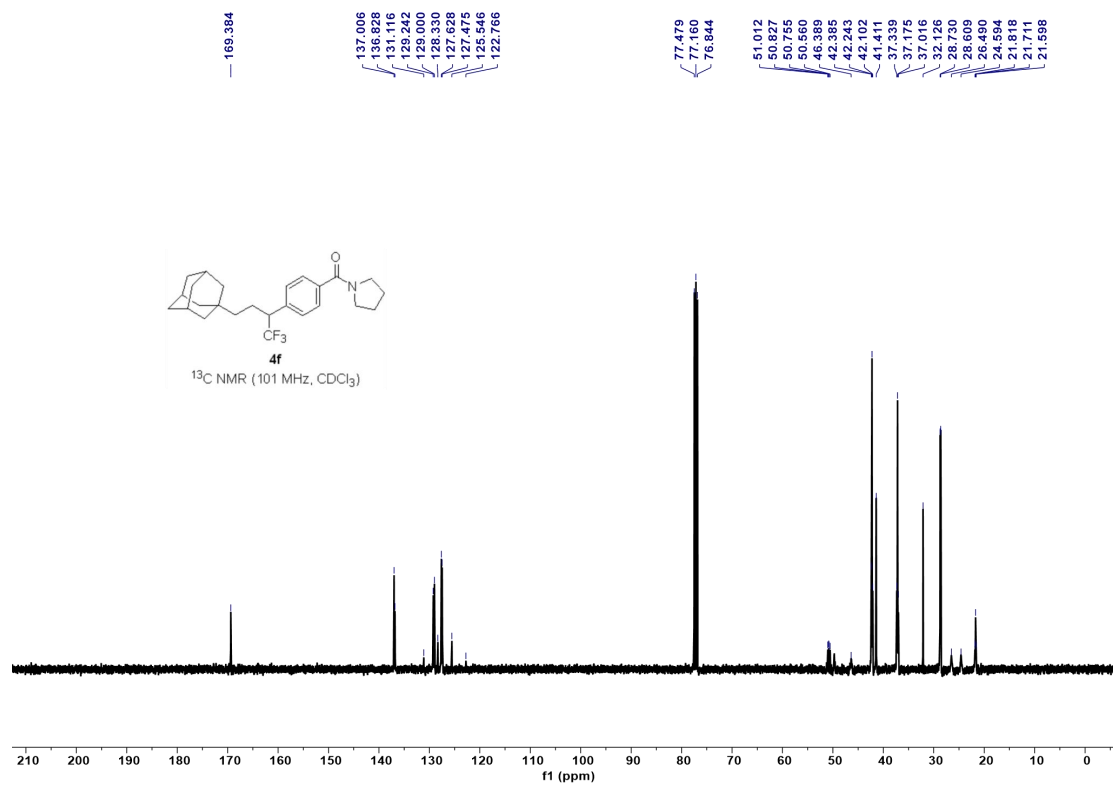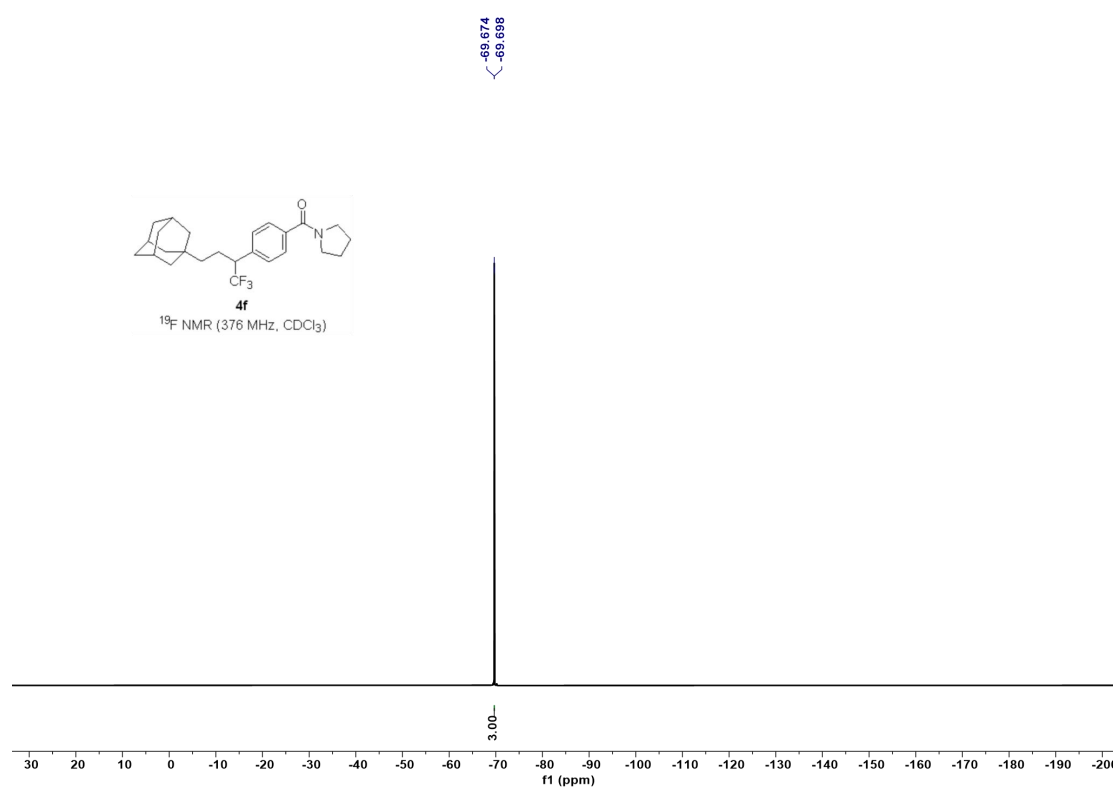

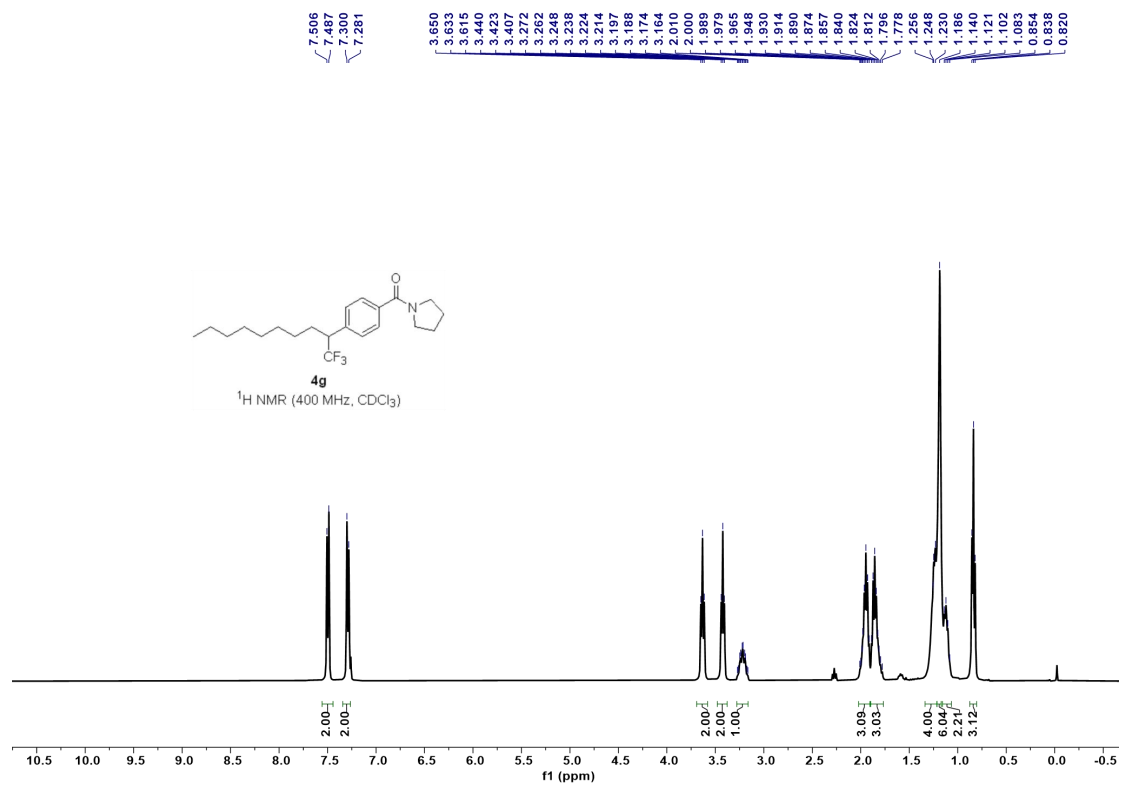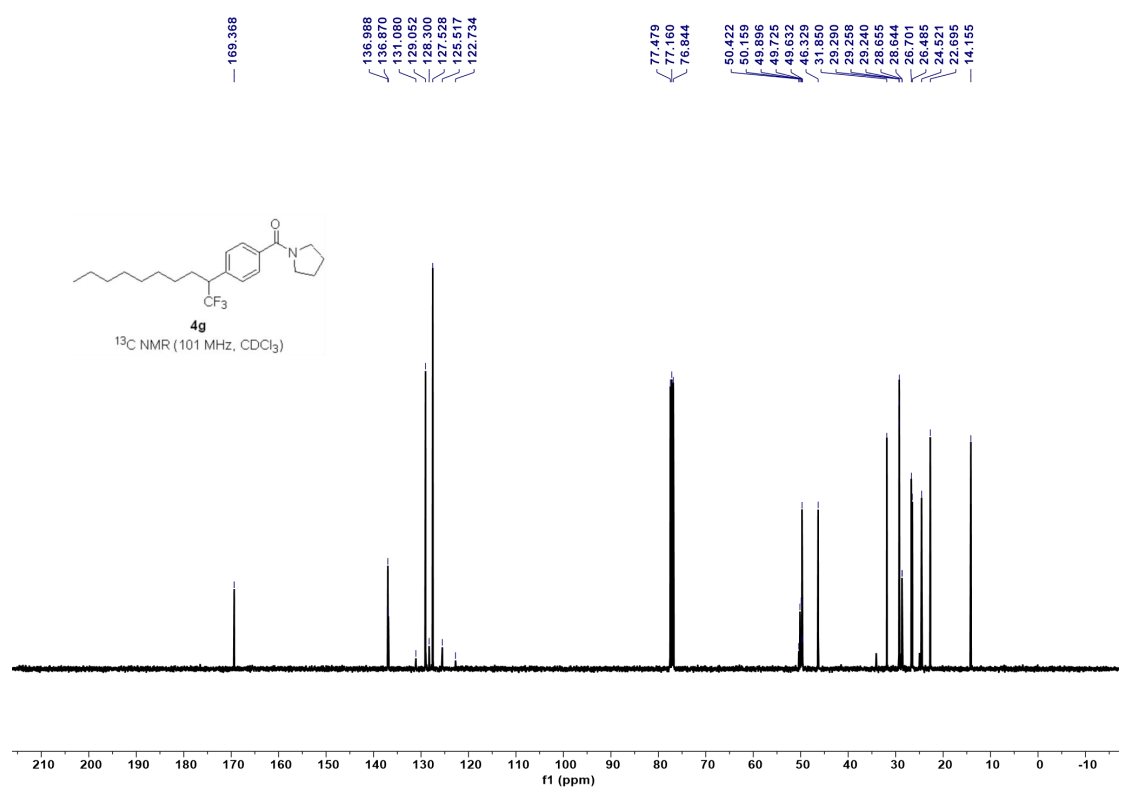

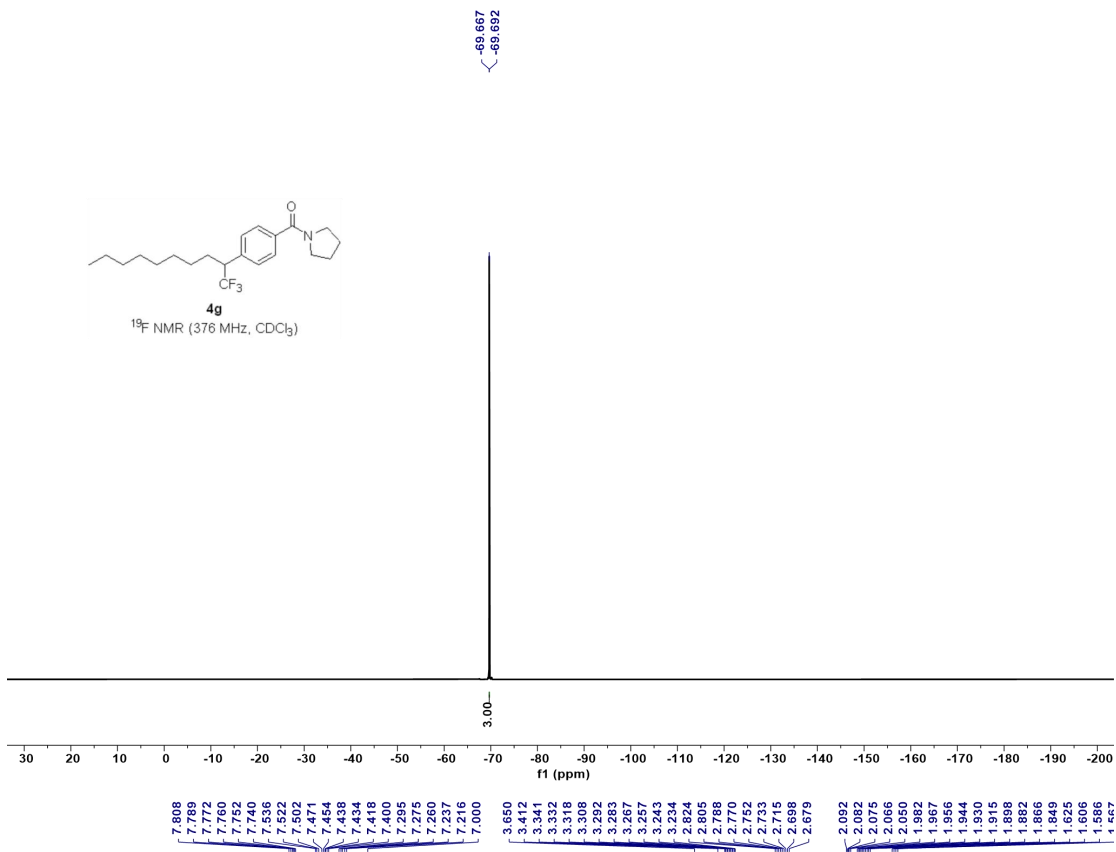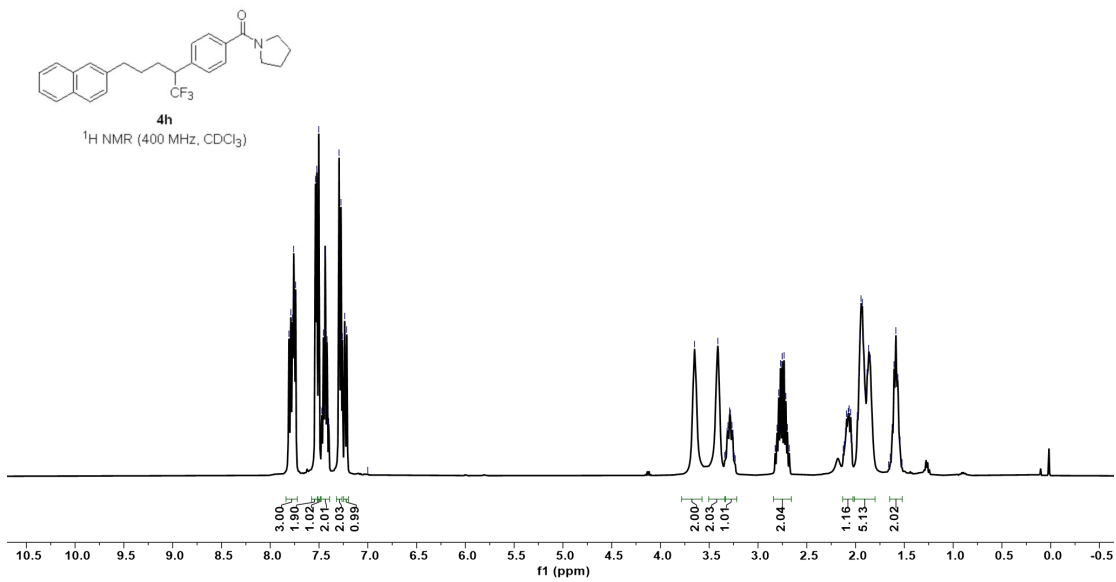

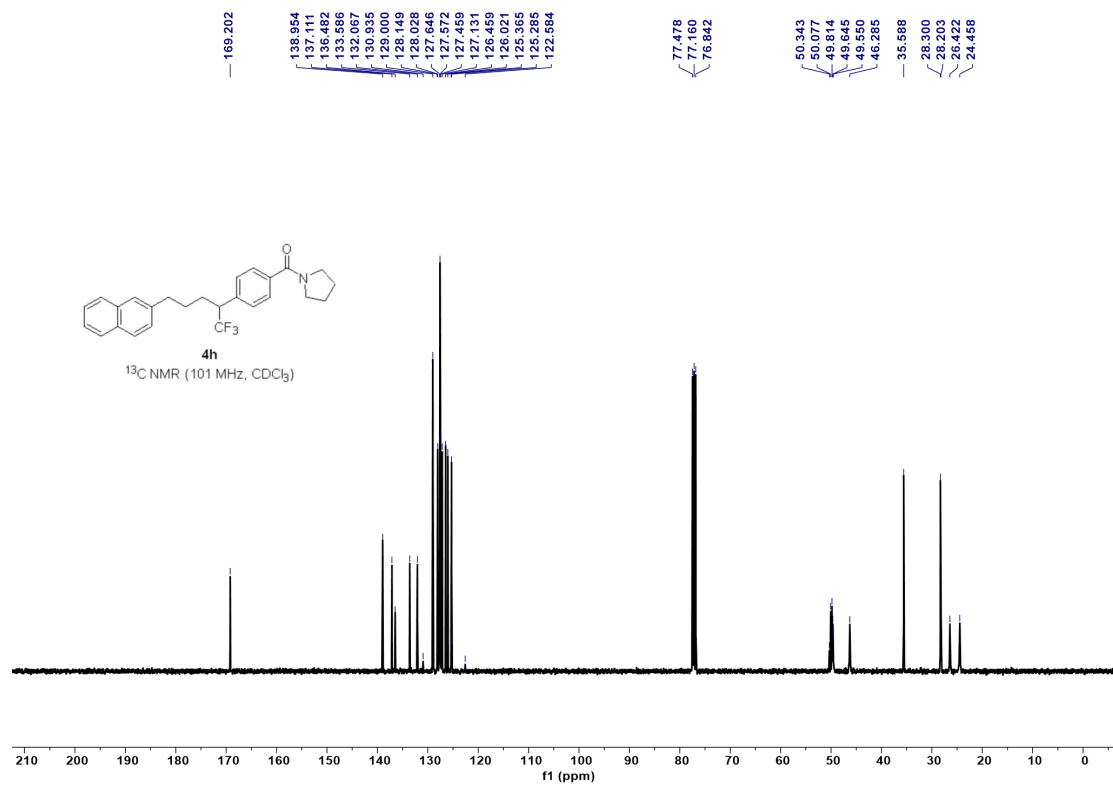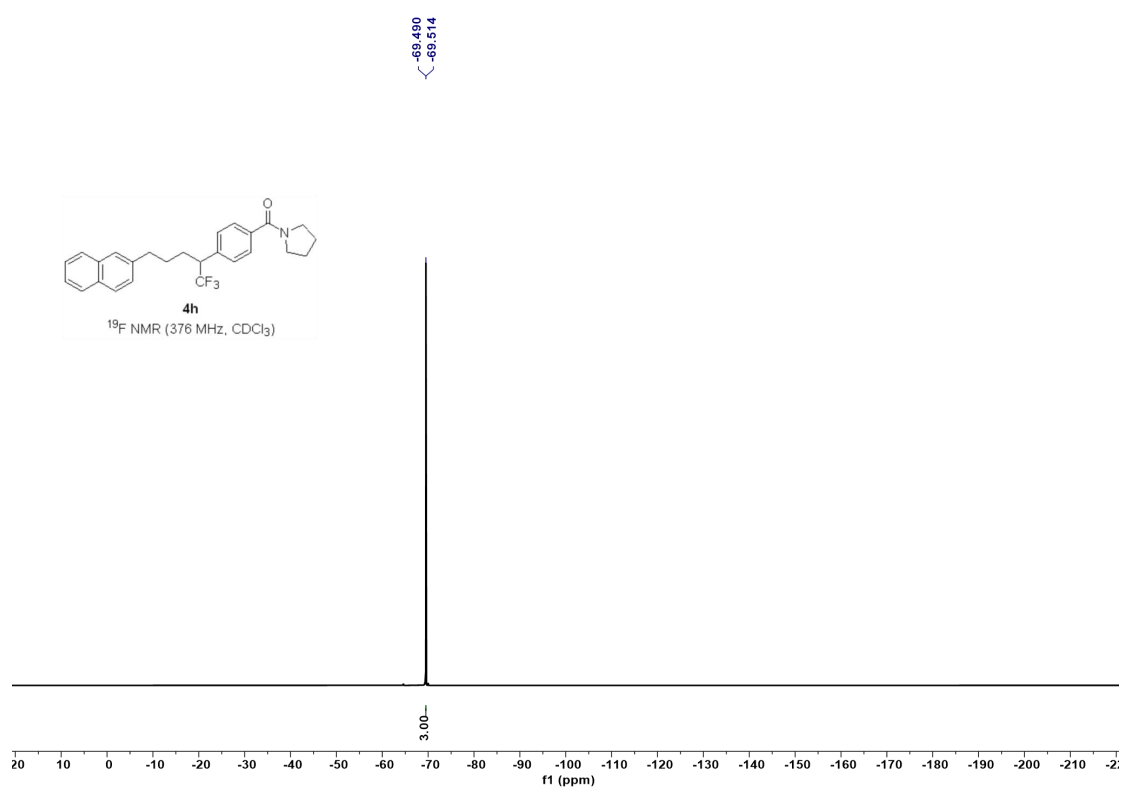

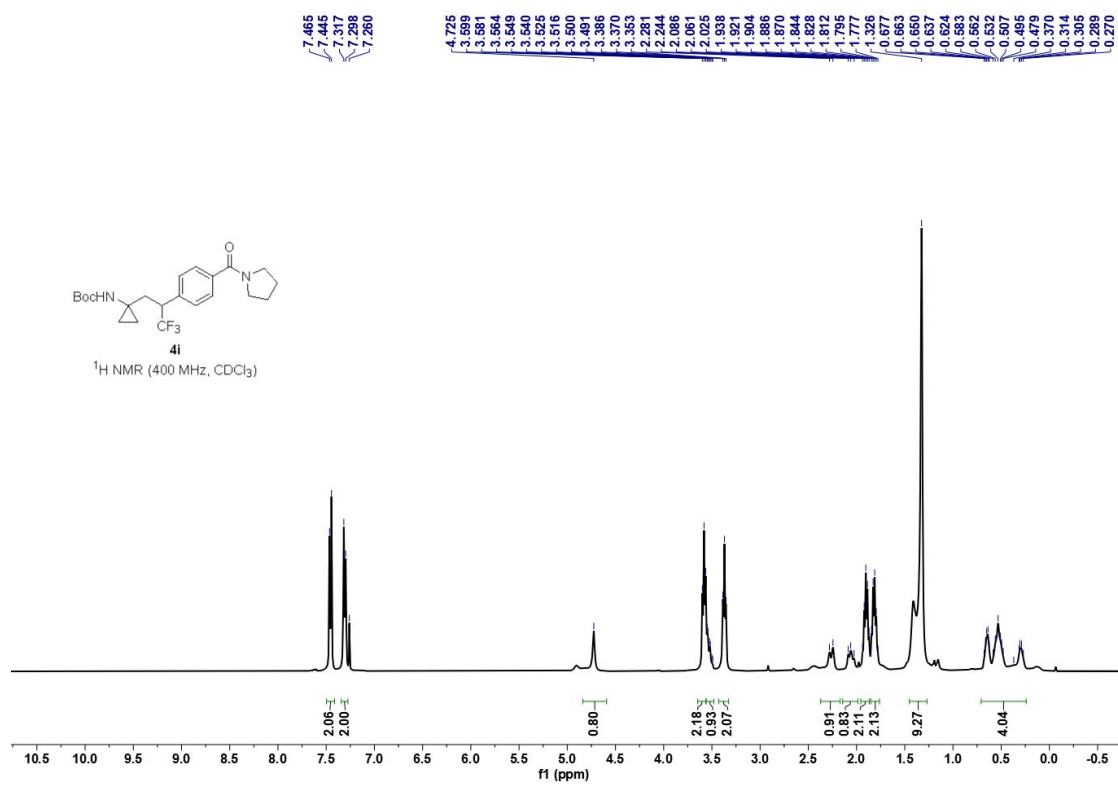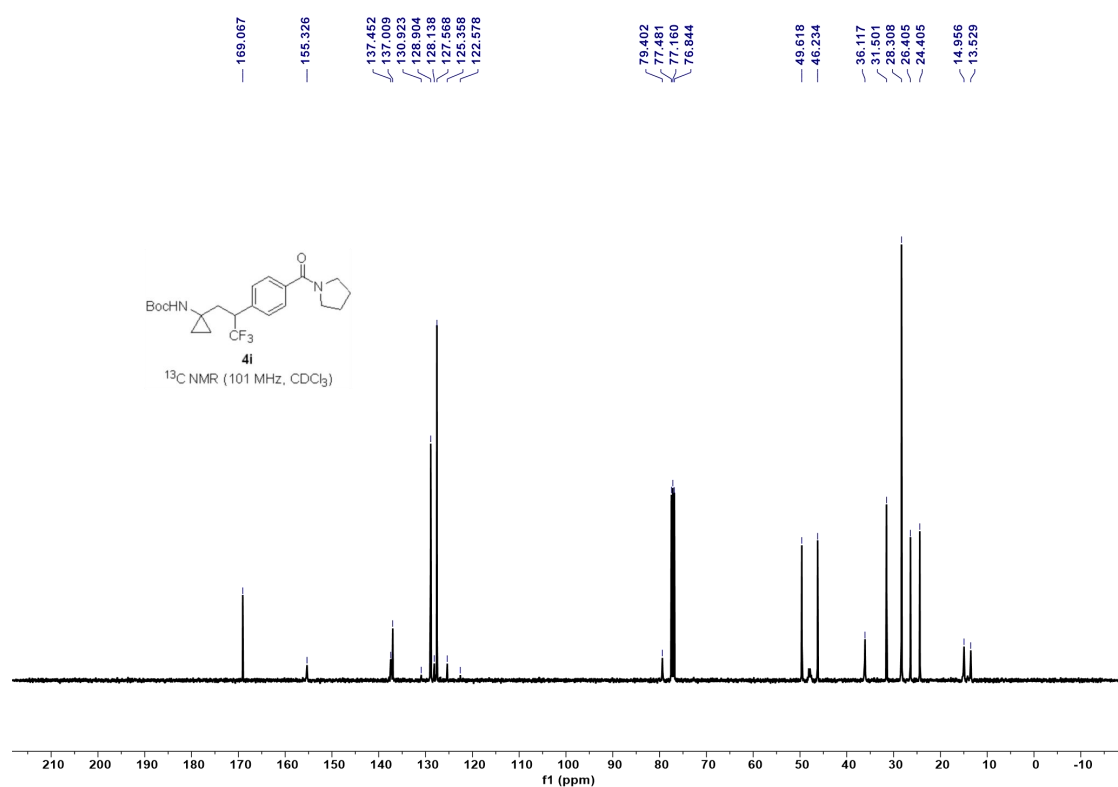



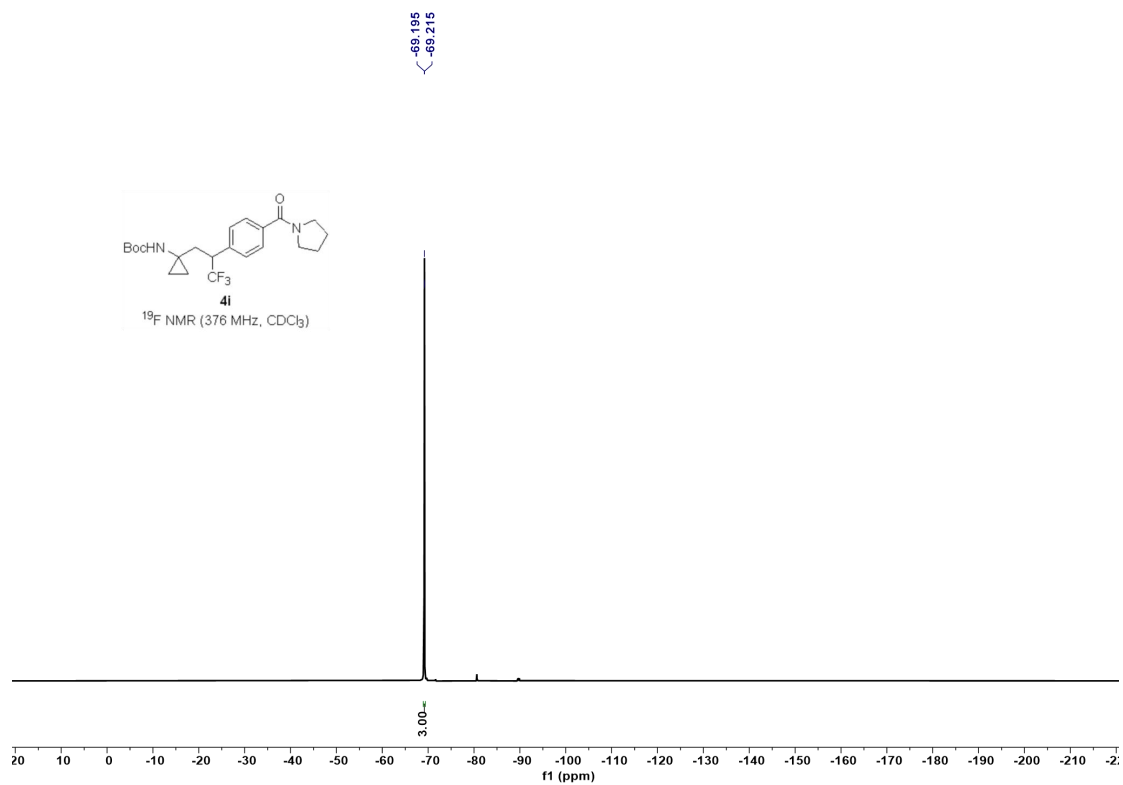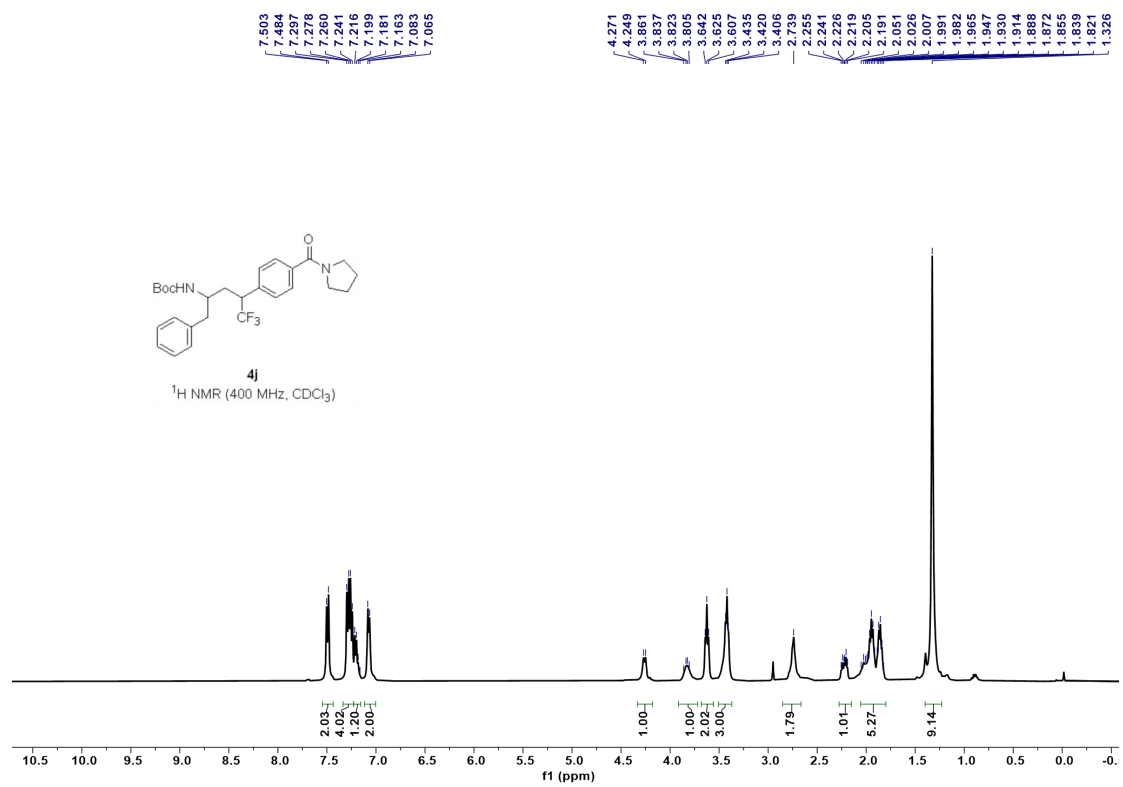

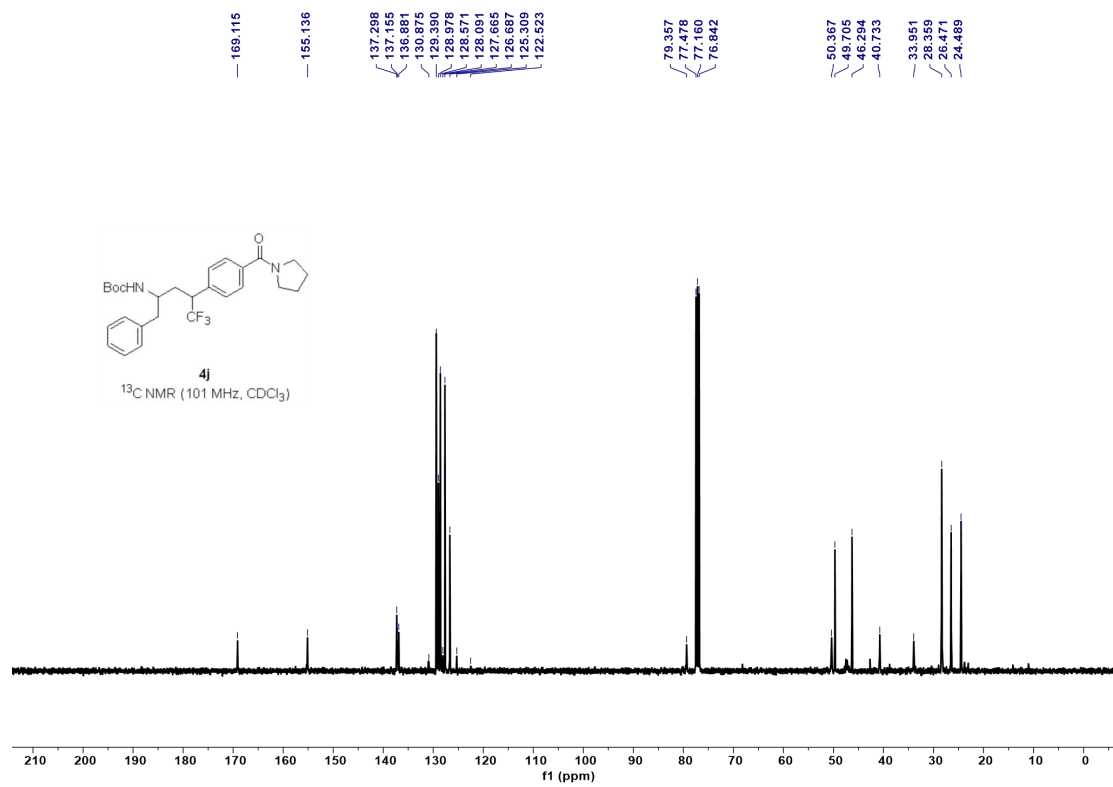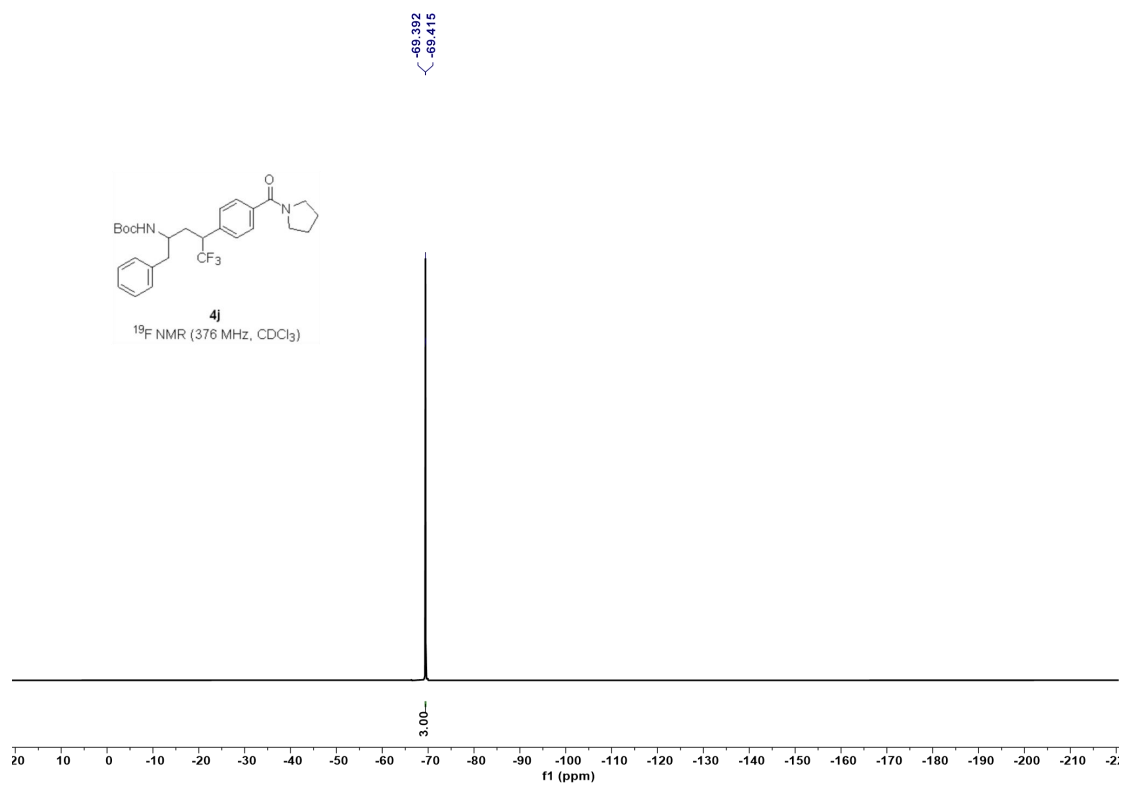

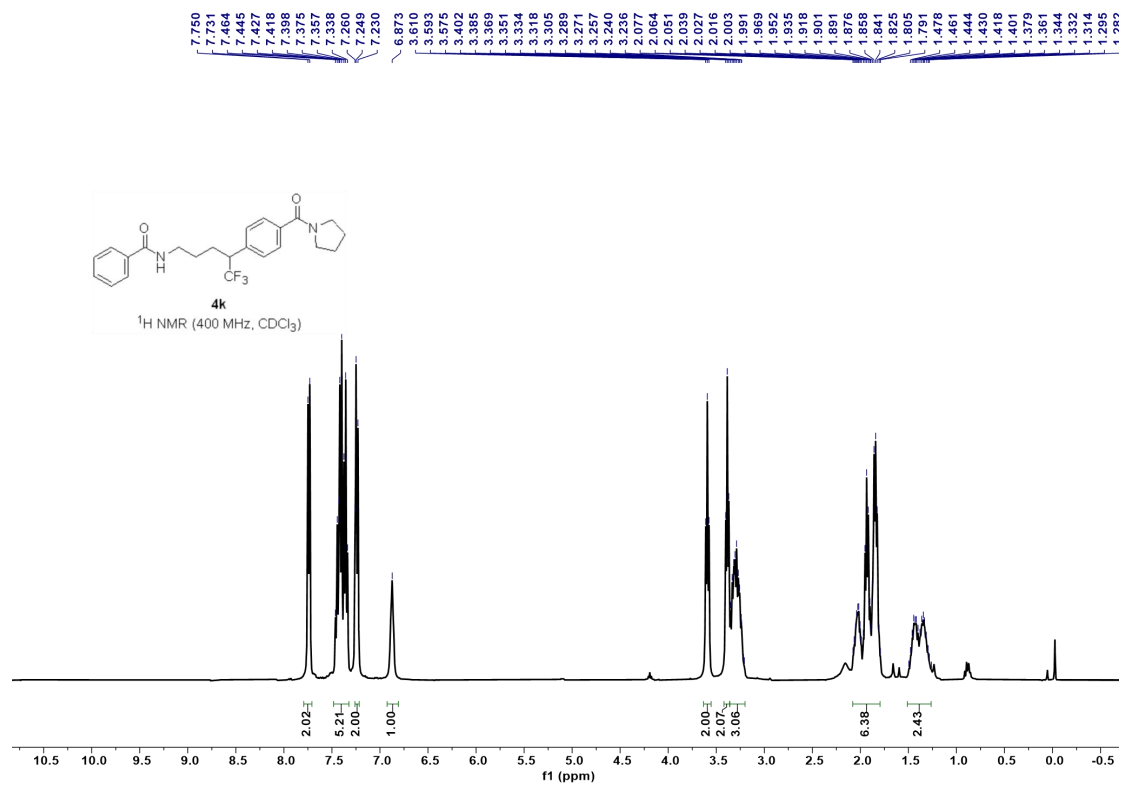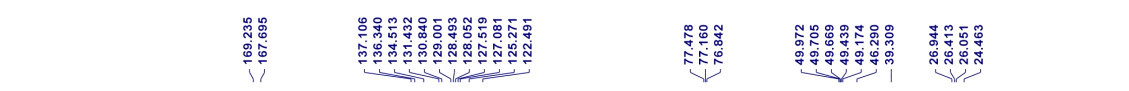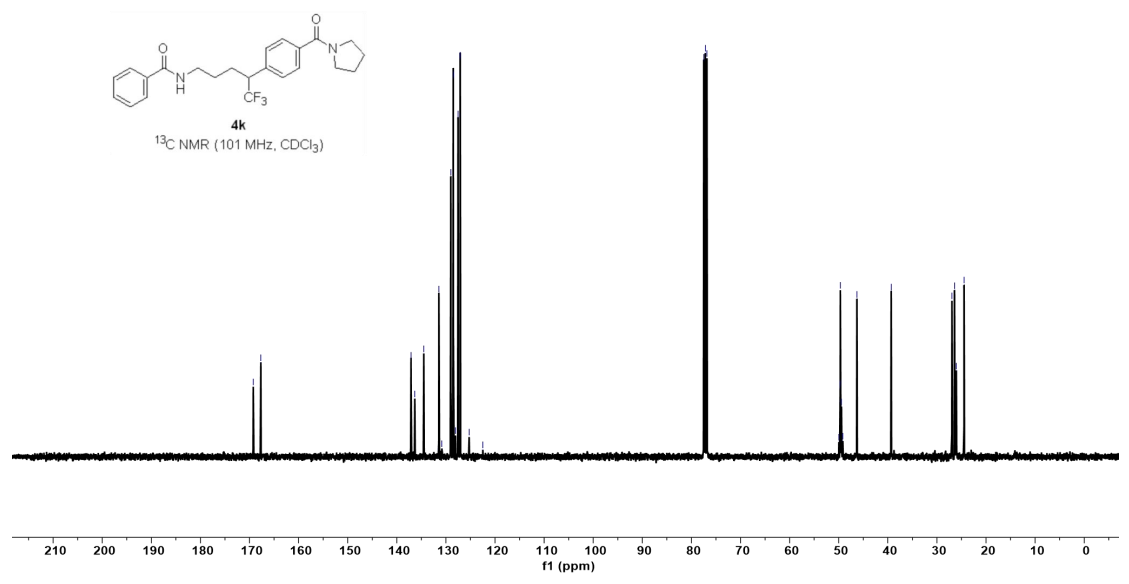

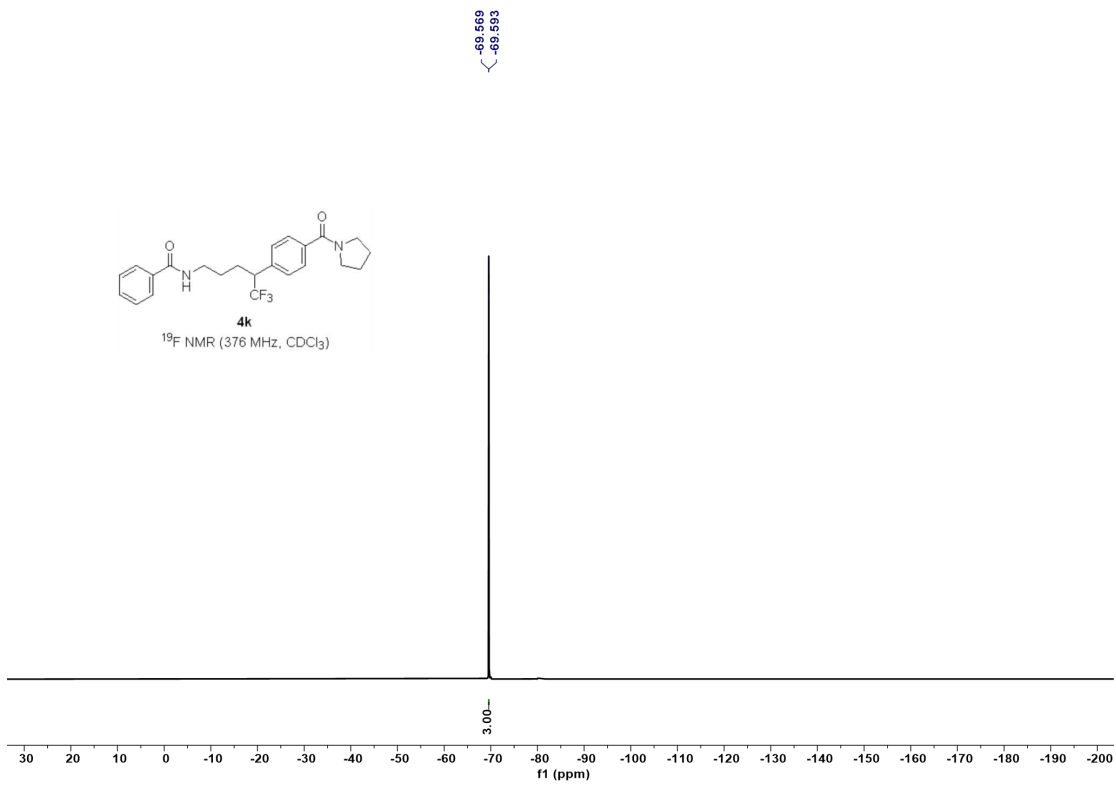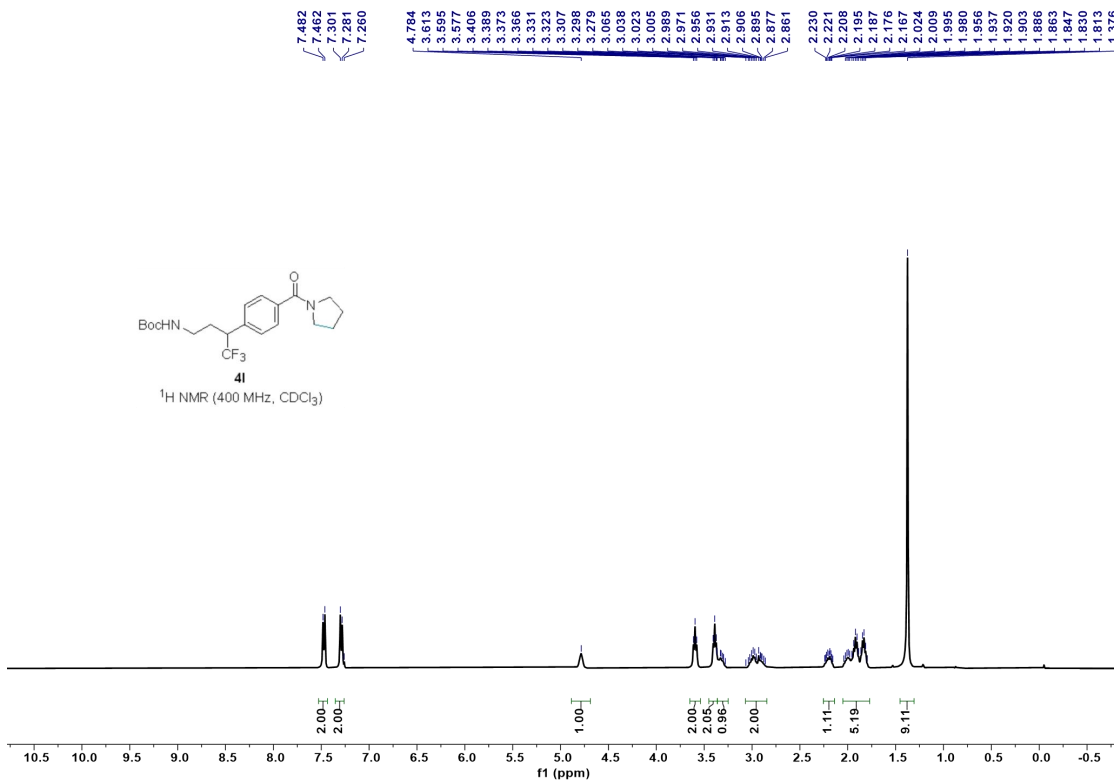

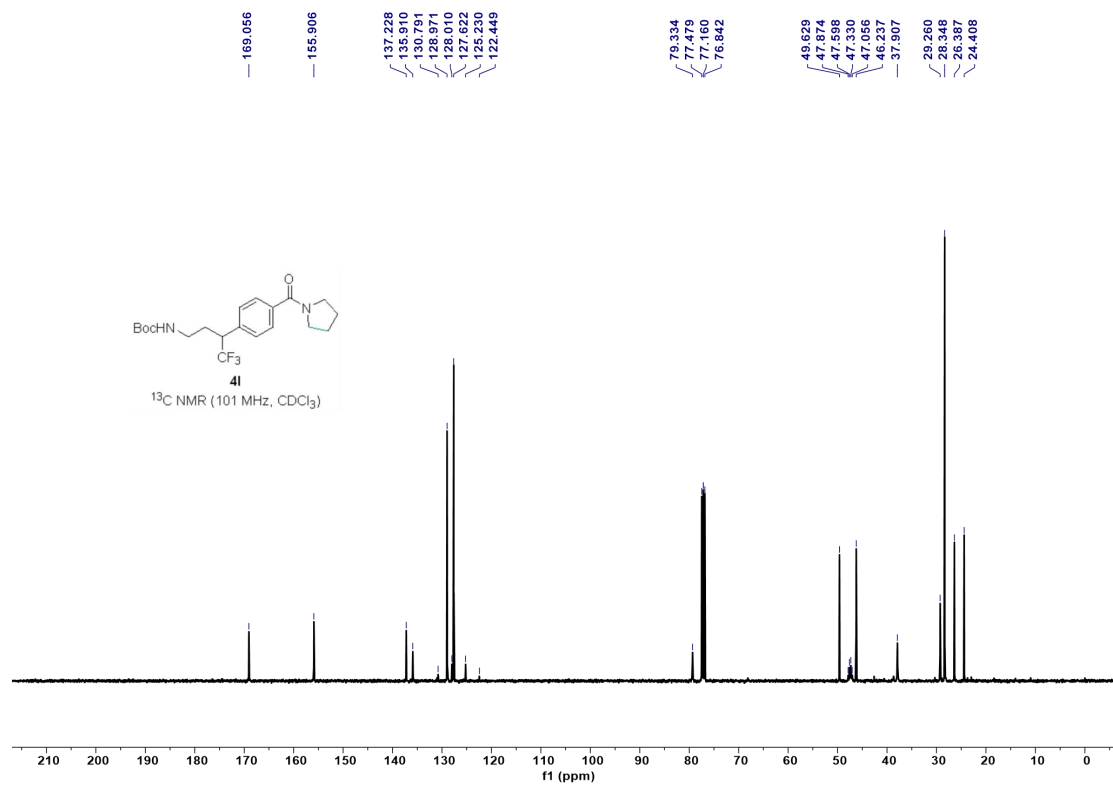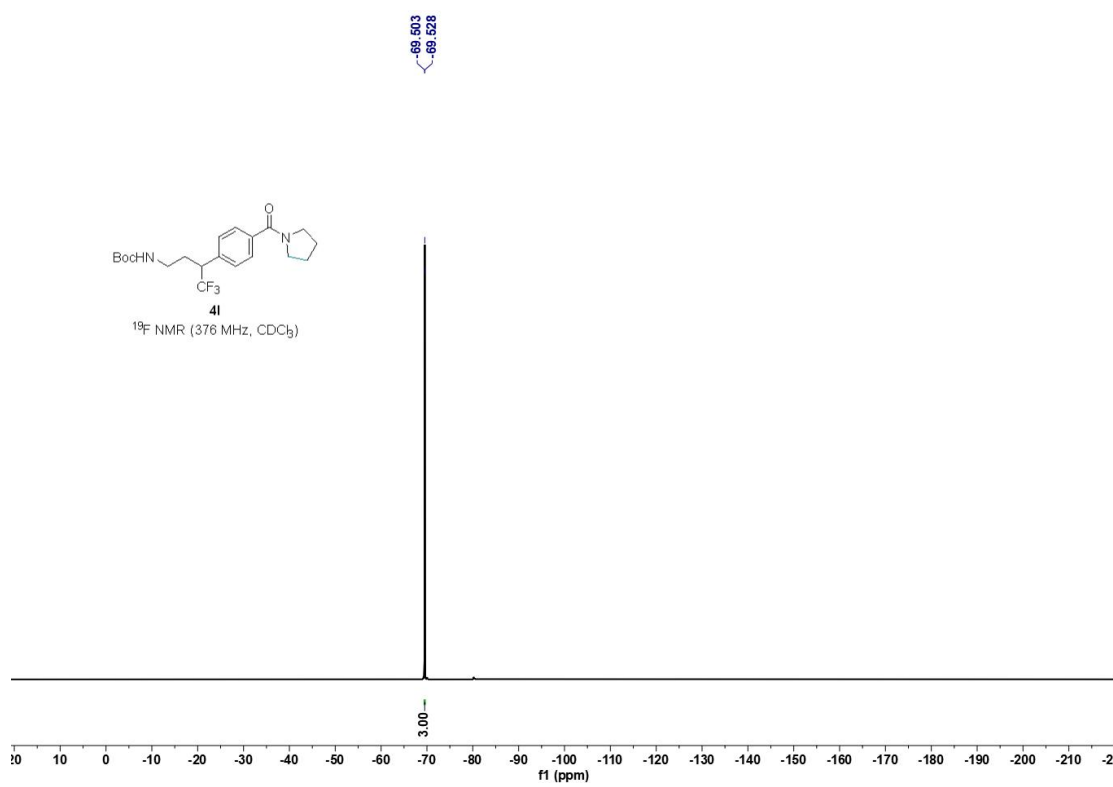

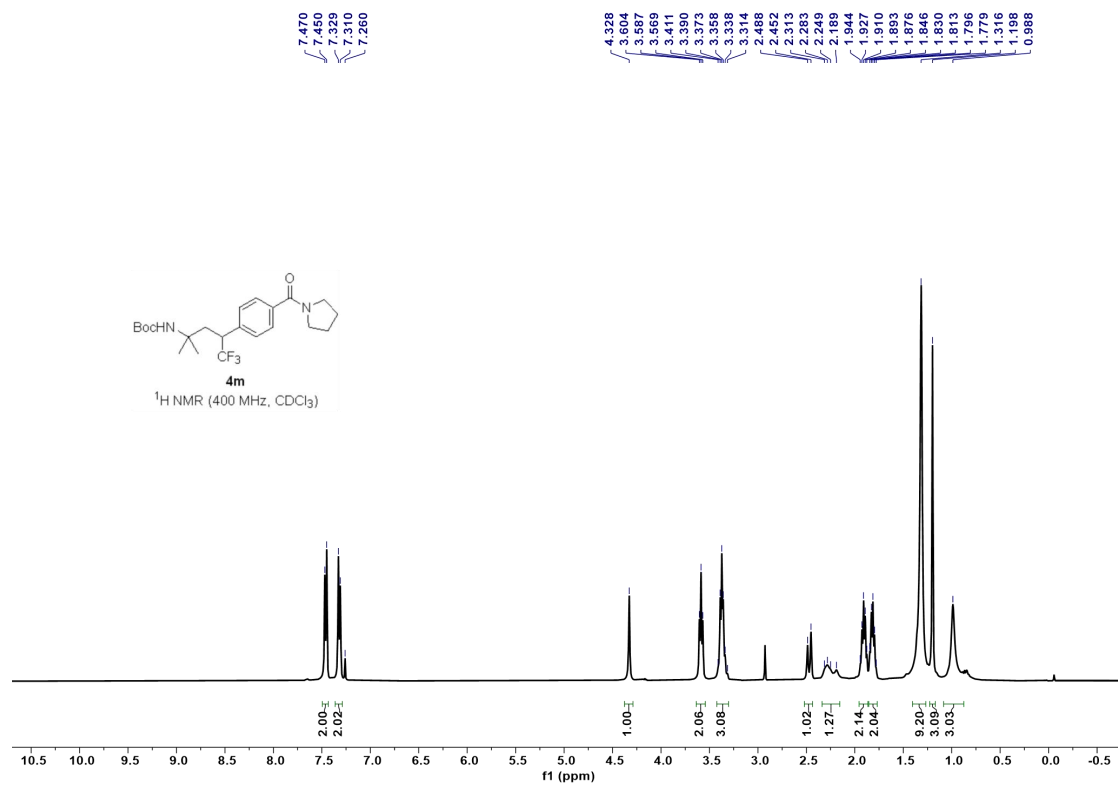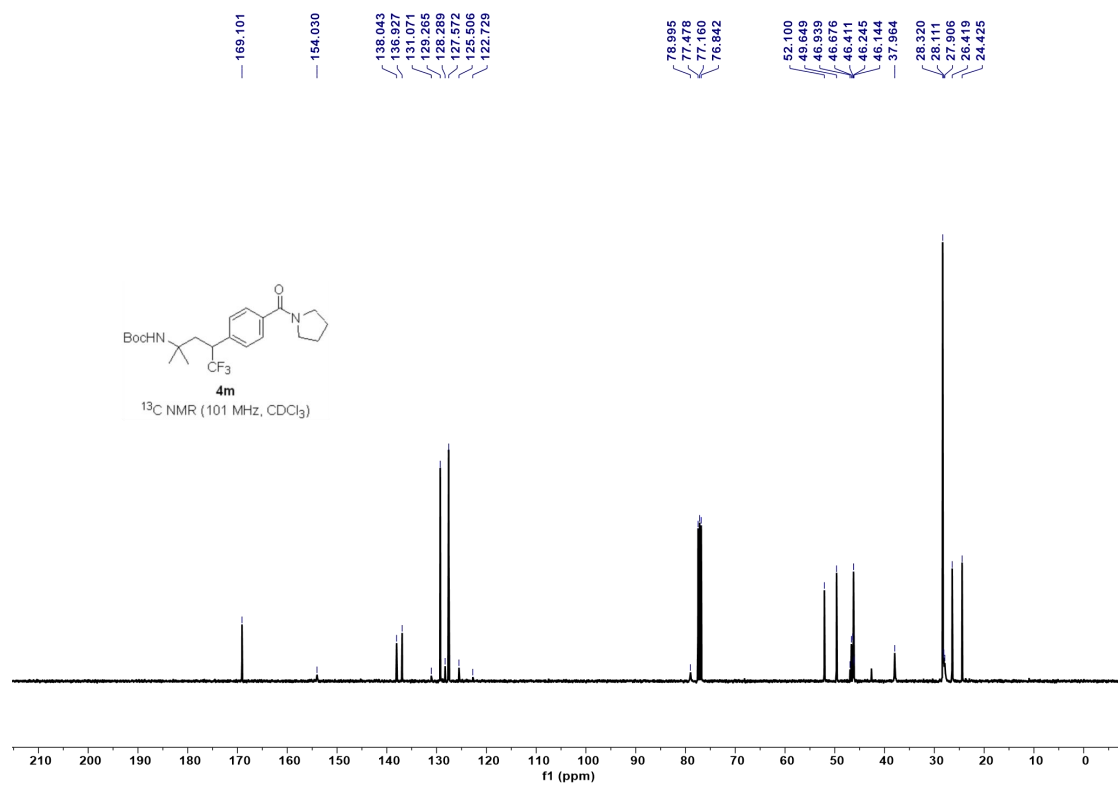

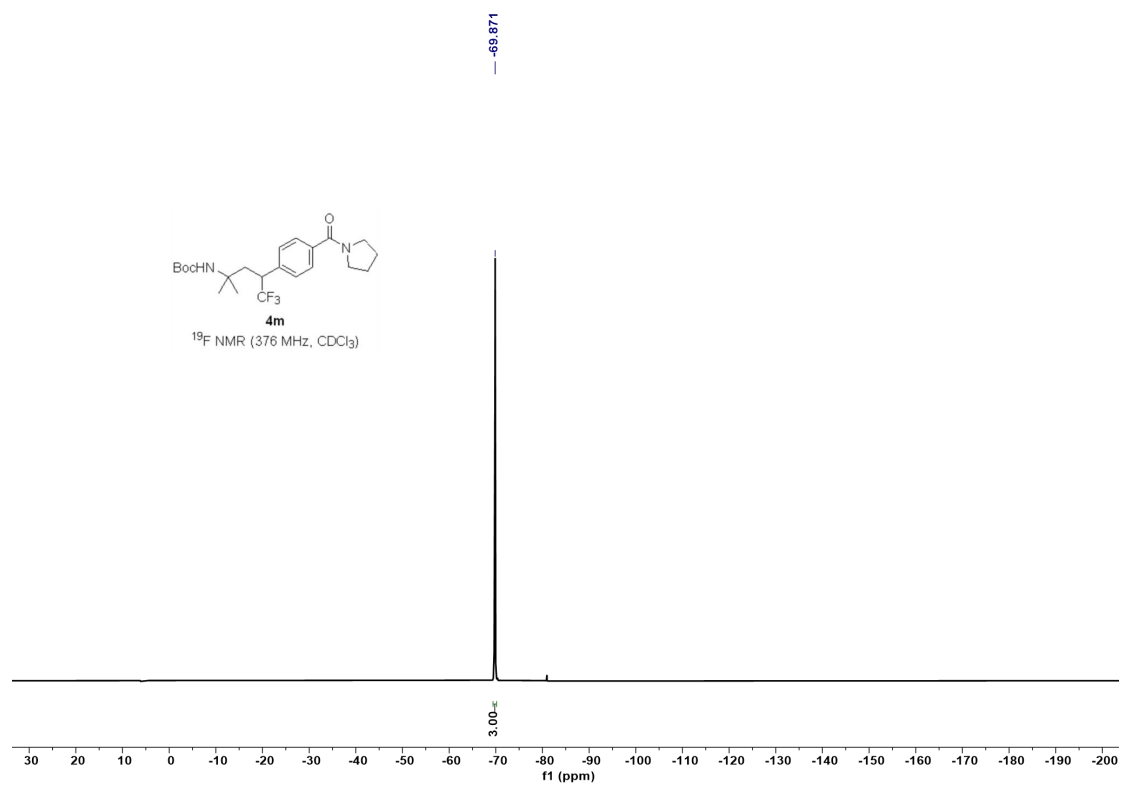

Supplement: d4ob01950d1.pdf [file d4ob01950d1.pdf]
